# Supplementary material for: Education mediating the associations between early life factors and frailty: a cross-sectional study of the UK Biobank
Source: PubMed Central journal article supplement (PMC9990643; doi:10.1136/bmjopen-2021-057511), 2023-03-02
Supplement: bmjopen-2021-057511.draft_revisions.pdf [file bmjopen-2021-057511.draft_revisions.pdf]

# BMJ Open

BMJ Open is committed to open peer review. As part of this commitment we make the peer review history of every article we publish publicly available.

When an article is published we post the peer reviewers' comments and the authors' responses online. We also post the versions of the paper that were used during peer review. These are the versions that the peer review comments apply to.

The versions of the paper that follow are the versions that were submitted during the peer review process. They are not the versions of record or the final published versions. They should not be cited or distributed as the published version of this manuscript.

BMJ Open is an open access journal and the full, final, typeset and author-corrected version of record of the manuscript is available on our site with no access controls, subscription charges or pay-per-view fees (<http://bmjopen.bmj.com>).

If you have any questions on BMJ Open's open peer review process please email [info.bmjopen@bmj.com](mailto:info.bmjopen@bmj.com)

# BMJ Open

## Pathways linking early life factors and frailty among middle-aged and older adults in England: Findings from the UK Biobank

|                               |                                                                                                                                                                                                                                                                                                                                                                                                                                                                                                                                                                                                                                                                                                           |
|-------------------------------|-----------------------------------------------------------------------------------------------------------------------------------------------------------------------------------------------------------------------------------------------------------------------------------------------------------------------------------------------------------------------------------------------------------------------------------------------------------------------------------------------------------------------------------------------------------------------------------------------------------------------------------------------------------------------------------------------------------|
| Journal:                      | <i>BMJ Open</i>                                                                                                                                                                                                                                                                                                                                                                                                                                                                                                                                                                                                                                                                                           |
| Manuscript ID                 | bmjopen-2021-057511                                                                                                                                                                                                                                                                                                                                                                                                                                                                                                                                                                                                                                                                                       |
| Article Type:                 | Original research                                                                                                                                                                                                                                                                                                                                                                                                                                                                                                                                                                                                                                                                                         |
| Date Submitted by the Author: | 19-Sep-2021                                                                                                                                                                                                                                                                                                                                                                                                                                                                                                                                                                                                                                                                                               |
| Complete List of Authors:     | Maharani, Asri; The University of Manchester, Social Work<br>Didikoglu, Altug; The University of Manchester, Division of Neuroscience & Experimental Psychology<br>O'Neill, Terence; University of Manchester, Centre for Epidemiology Versus Arthritis, Division of Musculoskeletal & Dermatological Sciences; Manchester University NHS Foundation Trust, UK & NIHR Biomedical Research Centre<br>Pendleton, Neil; The University of Manchester, Division of Neuroscience & Experimental Psychology<br>Canal, Maria; The University of Manchester, Division of Neuroscience & Experimental Psychology<br>Payton, Antony; The University of Manchester, Division of Informatics, Imaging & Data Sciences |
| Keywords:                     | EPIDEMIOLOGY, GERIATRIC MEDICINE, SOCIAL MEDICINE                                                                                                                                                                                                                                                                                                                                                                                                                                                                                                                                                                                                                                                         |
|                               |                                                                                                                                                                                                                                                                                                                                                                                                                                                                                                                                                                                                                                                                                                           |

SCHOLARONE™  
Manuscripts

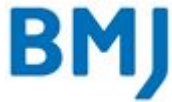

I, the Submitting Author has the right to grant and does grant on behalf of all authors of the Work (as defined in the below author licence), an exclusive licence and/or a non-exclusive licence for contributions from authors who are: i) UK Crown employees; ii) where BMJ has agreed a CC-BY licence shall apply, and/or iii) in accordance with the terms applicable for US Federal Government officers or employees acting as part of their official duties; on a worldwide, perpetual, irrevocable, royalty-free basis to BMJ Publishing Group Ltd ("BMJ") its licensees and where the relevant Journal is co-owned by BMJ to the co-owners of the Journal, to publish the Work in this journal and any other BMJ products and to exploit all rights, as set out in our [licence](#).

The Submitting Author accepts and understands that any supply made under these terms is made by BMJ to the Submitting Author unless you are acting as an employee on behalf of your employer or a postgraduate student of an affiliated institution which is paying any applicable article publishing charge ("APC") for Open Access articles. Where the Submitting Author wishes to make the Work available on an Open Access basis (and intends to pay the relevant APC), the terms of reuse of such Open Access shall be governed by a Creative Commons licence – details of these licences and which [Creative Commons](#) licence will apply to this Work are set out in our licence referred to above.

Other than as permitted in any relevant BMJ Author's Self Archiving Policies, I confirm this Work has not been accepted for publication elsewhere, is not being considered for publication elsewhere and does not duplicate material already published. I confirm all authors consent to publication of this Work and authorise the granting of this licence.

**Title Page****Title:**

Pathways linking early life factors and frailty among middle-aged and older adults in England:

Findings from the UK Biobank

**Running Title:**

Early-life factors and frailty

**Keywords:**

UK Biobank, Early-life factors, frailty

**Authors and author affiliations:**

Asri Maharani, MD, PhD<sup>1\*</sup>, Altug Didikoglu, PhD<sup>2\*</sup>, Terence W O'Neill, MD, PhD<sup>3</sup>, Neil Pendleton, MD, PhD<sup>2</sup>, Maria Mercè Canal, PhD<sup>2</sup>, Antony Payton, PhD<sup>4</sup>

1) Division of Nursing, Midwifery, and Social Work, The University of Manchester, UK

2) Division of Neuroscience & Experimental Psychology, The University of Manchester, UK

3) Centre for Epidemiology Versus Arthritis, Division of Musculoskeletal & Dermatological Sciences, The University of Manchester, UK & NIHR Biomedical Research Centre, Manchester University NHS Foundation Trust, Manchester.

4) Division of Informatics, Imaging & Data Sciences, The University of Manchester, UK

\* These authors contributed equally to this work

**Corresponding author's full address and corresponding author's current email:**

**Name:** Asri Maharani

**Address:** Division of Nursing, Midwifery, and Social Work, The University of Manchester, Jane McFarlane Building, Oxford Road, M13 9PL, Manchester, UK

**Email:** asri.maharani@manchester.ac.uk

**Acknowledgements**

1  
2  
3 Altug Didikoglu was supported by a grant from the Republic of Turkey Ministry of National  
4 Education. This research has been conducted using the UK Biobank Resource under  
5  
6 Application Number 41877.  
7  
8

9  
10 **Conflicts of interest**

11  
12 All authors declare no conflicts of interest.  
13

14  
15 **Main text word counts:** 3296

16  
17 **Number of data elements:** 3  
18  
19  
20  
21  
22  
23  
24  
25  
26  
27  
28  
29  
30  
31  
32  
33  
34  
35  
36  
37  
38  
39  
40  
41  
42  
43  
44  
45  
46  
47  
48  
49  
50  
51  
52  
53  
54  
55  
56  
57  
58  
59  
60

For peer review only

## Abstract

**Objectives** Exposures in utero and during infancy may impact the development of diseases later in life. They may be linked with development of frailty though the mechanism is unclear. This study aims to determine the associations between early life risk factors and development of frailty amongst middle-aged and older adults as well as potential pathways via education and socioeconomic factors, for any observed association.

**Design** A cross-sectional study.

**Settings** This study used data from UK Biobank, a large population based cohort.

**Participants** 502,489 individuals aged 37-73 years were included in the analysis.

**Primary and secondary outcome measures** Early life factors in this study included being breastfed as a baby, maternal smoking, birth weight, the presence of perinatal diseases, birth month, and birth place (in or outside the UK). We developed a frailty index comprising 49 deficits. We used generalised structural equation modelling to examine the associations between early life factors and development of frailty and whether any observed association was mediated via educational attainment and income level.

**Results** A history of breastfeeding and higher birth weight were associated with a lower frailty index while maternal smoking, the occurrence of perinatal diseases and birth month with a longer day length were associated with a higher frailty index. Both educational level and income mediated the relationship between these early life factors and frailty index.

**Conclusions** This study highlights that biological and social risk occurring at different stages of life are related to the variations in frailty index in later life and suggests opportunities for prevention across the life course.

**Keywords** early life factors, frailty, generalised structural equation model, UK Biobank

## Article Summary

### Strengths and limitations of this study

- Using a large cohort of British adults in middle and older age, this study was sufficiently powered to identify associations between early life factors and frailty index.
- The findings provide the first evidence that education and income mediate the association between early life factors and frailty index.
- As the cohort is not nationally representative, the findings cannot be generalised to the general population.
- The questionnaire on early life factors was based on self-report and is therefore subject to recall error.

## Introduction

As the world's population ages, a major goal is the attainment of increased life expectancy accompanied by fewer years spent in poor health and with disability and dependency. The worldwide population of older people (65 years and above) is predicted to double from 0.7 billion (9%) in 2019 to 1.5 billion (16%) in 2050.<sup>1</sup> In addition, there is evidence that the number of disability adjusted life years (DALY) among those aged 60 years and older is increasing (from 434 million in 1990 to 574 million in 2010),<sup>2</sup> which will increase demand for health and care services. As physical disability is an adverse outcome of frailty,<sup>3</sup> more research in geriatrics and gerontology has focused on defining and recognising frailty among older people with the aim of determining preventive and interventional measures.<sup>4</sup>

Frailty can be defined as a state of increased vulnerability resulting from an age-related decline in physiologic and cognitive reserves and function following stressor events.<sup>5</sup> The frailty index approach, developed by Rockwood et al.,<sup>6</sup> measures frailty level as the number of deficits present over the number of deficits considered, including symptoms, diagnosis, disabilities, and functional impairments. Frailty has become more common with the ageing of the population. A systematic review including 240 studies from 62 countries showed that 24% of people aged 50 years and older are frail as calculated using the frailty index approach.<sup>7</sup>

Frailty has been found to be associated with adverse health outcomes including loss of mobility, disability, falls, hospitalisation, need for long-term care, and death.<sup>8-10</sup>

Understanding the factors that are associated with frailty is thus important for developing interventions to prevent frailty and for providing directions for future public health policies.

A growing body of literature acknowledges that the first two decades of human life are critical in determining adult life trajectories. Body size at birth has been found to be associated with adult chronic diseases,<sup>11,12</sup> grip strength<sup>13</sup> and physical activity.<sup>14</sup> Evidence has suggested that cigarette smoke exposure in utero is linked to the development of chronic diseases later in



1  
2  
3 life, including type 2 diabetes, obesity, certain cancers and respiratory disorders.<sup>15</sup> Infants  
4 exclusively breastfed have been found to have a lower risk of obesity, type 2 diabetes and  
5 high blood pressure in adulthood.<sup>16</sup> Studies in the USA<sup>17</sup> and China<sup>18</sup> have discovered a  
6 relationship between birth month and the risk of cardiovascular diseases later in life. In the  
7 USA, women born in spring and summer were shown to have higher cardiovascular specific  
8 mortality rates than those born in the autumn.<sup>17</sup> In a study using patient medical records from  
9 the BioBank of First Affiliated Hospital of Xinxiang Medical University patients born in  
10 winter were found to have a greater risk of coronary artery disease than those born in spring.<sup>18</sup>  
11  
12 New-borns' perinatal complications are related to accelerated ageing at midlife.<sup>19</sup>  
13

14  
15 There is some evidence also of a link between early life factors and occurrence of frailty. In  
16 a recent study in Finland, greater weight, length and BMI at birth were associated with a lower  
17 risk of frailty later in life.<sup>20</sup> However, data from the Netherlands have suggested no significant  
18 association between prenatal undernutrition and frailty among older adults.<sup>14</sup> The present  
19 study thus aims to determine the associations between early life factors, including a history  
20 of being breastfed, maternal smoking, birth weight, the presence of perinatal diseases, birth  
21 in or outside of the UK or outside the UK and birth month, and frailty in UK adults.  
22

23  
24 Furthermore, this study contributes to the literature investigating the determinants of health  
25 in later life by exploring the pathways of early life factors that have a lasting impact on health  
26 in middle and old age. The pathway hypothesis posits that early life conditions are important  
27 not only because they are directly associated with late life but also because they shape later  
28 life experiences,<sup>21,22</sup> including restricted educational attainment and life chances. The most  
29 frequently hypothesised pathway between circumstances in early stages of life and adult  
30 health is adult socioeconomic status. Pakpahan et al. showed that education and income  
31 mediate the link between childhood health and socioeconomic conditions and self-rated health  
32 among older Europeans.<sup>21</sup> Maternal smoking during pregnancy was found to be correlated  
33  
34  
35  
36  
37  
38  
39  
40  
41  
42  
43  
44  
45  
46  
47  
48  
49  
50  
51  
52  
53  
54  
55  
56  
57  
58  
59  
60

1  
2  
3 with the children's cognitive function,<sup>23</sup> while a longitudinal study in the US documented the  
4 relationship between low birth weight and lower educational attainment.<sup>24</sup> Education and  
5 income are among the predictors of frailty.<sup>25,26</sup> Because interventions that target common  
6 pathways have the potential to reduce frailty, the identification of the pathways of early life  
7 factors leading to frailty later in life has substantial public health relevance for the translation  
8 of life course epidemiology into practice. The present study considers whether any observed  
9 association between early life factors and frailty could be attributed to differences in education  
10 attainment and adult socioeconomic status (Figure 1).  
11  
12  
13  
14  
15  
16  
17  
18  
19  
20

## 21 **Methods**

### 22 **Source and Sample**

23  
24 Data were drawn from the UK Biobank, a prospective cohort study of the genetic,  
25 environmental and lifestyle causes of diseases among adults in the UK.<sup>27</sup> The study involved  
26 the collection of extensive questionnaire data and biological samples from, and the  
27 performance of, physical examinations of more than 500,000 respondents enrolled at 22  
28 assessment sites in England, Scotland, and Wales between 2006 and 2010. Subjects who took  
29 part provided written informed consent for data collection, analysis and linkage; they also  
30 completed a touchscreen questionnaire, a nurse-led interview, and had their physical  
31 measurements taken. The UK Biobank invited adults who were registered with a general  
32 practitioner and who lived within reasonable traveling distance of the assessment centre. The  
33 current study includes 502,489 individuals aged 37-73 years who had study-specific available  
34 data and were not withdrawn from the study. This study was conducted as part of UK Biobank  
35 Project Number 41877 and is covered by the generic ethics approval for UK Biobank studies  
36 from the NHS National Research Ethics Service (16/NW/0274).  
37  
38  
39  
40  
41  
42  
43  
44  
45  
46  
47  
48  
49  
50  
51  
52  
53  
54  
55

### 56 **Measures**

#### 57 *Early life factors*

58  
59  
60

1  
2  
3 Information by questionnaire was obtained on: maternal smoking in the pre- and post-natal  
4 period, history of being breastfed as a baby, birth month, birthweight, the presence of perinatal  
5 diseases, and place of birth. We defined maternal smoking based on the question ‘Did your  
6 mother smoke regularly around the time when you were born?’ (Data-Field 1787).  
7  
8 Respondents were categorised as having been breastfed as babies if they answered ‘yes’ to  
9 the question: ‘Were you breastfed when you were a baby?’ (Data-Field 1677). We retrieved  
10 information on birth month from the birth date (Data-Field 52) and treated it as the cosine of  
11 the values, representing the rhythmic seasonal length of day and night. We considered this  
12 might represent daylight time better than treating it as a categorical variable. This is an  
13 approach which we have used in a previous study.<sup>28</sup> Birth months of participants born in the  
14 UK and other countries in the southern hemisphere were converted to their antiphase.  
15 Information on birthweight was gathered by means of self-reported birthweight in kilograms  
16 (Data-Field 20022). We used the same measure in our prior study.<sup>28</sup> The presence of perinatal  
17 diseases (‘ICD10 Chapter XVI: Certain conditions originating in the perinatal period’) was  
18 coded as one based on self-reported medical history (Category 2416). We categorised the  
19 place birth of the respondents as born in the UK or outside the UK (Data-Field 1647). Answers  
20 of ‘Do not know’ or ‘Prefer not to answer’ were accepted as missing for all questions.  
21  
22  
23  
24  
25  
26  
27  
28  
29  
30  
31  
32  
33  
34  
35  
36  
37  
38  
39  
40  
41

#### 42 *Education*

43  
44 The education variable represents the highest educational level completed by the respondents.  
45 Qualifications were categorised as high school or less (reference) and college or university  
46 degree (Data-Field 6138).  
47  
48  
49  
50

#### 51 *Income*

52  
53 Income (at the time of the assessment) was determined according to average total household  
54 income before tax (Data-Field 738). Income was classified into five ordinal groups: less than  
55  
56  
57  
58  
59  
60

1  
2  
3 £18,000; £18,000 to £30,999; £31,000 to £51,999; £52,000 to £100,000; and greater than  
4  
5 £100,000.  
6

### 7 *Frailty index*

8  
9  
10 Following William et al.,<sup>29</sup> we derived the frailty index using 49 functional, psychological,  
11  
12 and social deficits within the range of data variables in the UK Biobank (see Supplementary  
13  
14 Table 1). We coded the binary variables as 0 or 1, and for ordinal and continuous variables,  
15  
16 coding was based on distribution. The total number of deficits was summed and divided by  
17  
18 total possible deficits to create a frailty index between 0 and 1, where higher scores indicated  
19  
20 greater frailty.  
21  
22

### 23 *Covariates*

24  
25 We included demographic and health behaviour as covariates. Demographic information  
26  
27 included age (in years; Data-Field 21003), gender (with male as the reference; Data-Field 31),  
28  
29 and ethnicity (other than Caucasian as the reference or Caucasian; Data-Field 21000). Health  
30  
31 behaviours included physical activity, alcohol intake and smoking status. Physical activity  
32  
33 was measured as the number of days per week respondents engaged in at least 10 minutes of  
34  
35 moderate or vigorous physical activity (Data-Field 884, Data-Field 904). Respondents were  
36  
37 classified as non-current smokers (reference) or current smokers (Data-Field 20116). Alcohol  
38  
39 intake status was classified as non-current (reference) or current alcohol drinking (Data-Field  
40  
41 20117).  
42  
43  
44  
45

### 46 **Statistical Analyses**

47  
48  
49 Descriptive statistics were used to summarise subject characteristics including means and  
50  
51 standard deviation for continuous variables and frequencies and percentages for categorical  
52  
53 variables. We looked at the associations between frailty index and both early life factors and  
54  
55 other covariates using unpaired t-tests (dichotomous variables), ANOVA (categorical  
56  
57 variables), and Pearson's correlation (continuous variables).  
58  
59  
60

1  
2  
3 The structural equation model (SEM) has been widely used to investigate complex  
4 relationships between variables in epidemiological studies.<sup>30</sup> SEM can be used to resolve the  
5 endogeneity problem between variables and to explore direct, indirect, and total effects  
6 between exogenous and endogenous variables. It can jointly test a variety of hypotheses that  
7 involve different types of complicated cause-effect relationships. However, all responses are  
8 assumed to be continuous, even when a variable is binary or categorical. In our analysis we  
9 include binary (education) and ordinal outcome variables (income). To address this, we used  
10 a generalised structural equation model (GSEM) to identify the link between early life factors  
11 and frailty index and the mediating effect of education and income on that relationship. A  
12 GSEM combines generalised linear model (GLM) estimation and SEM modelling estimation;  
13 it can accommodate binary, ordinal, counted and categorical data.<sup>31</sup> Using maximum  
14 likelihood estimators, GLM estimators are based on a density function, allowing the direct  
15 use of all types of data.<sup>32</sup> The analyses were performed using the 'gsem' command (STATA  
16 Version 17).

17 We examined two models. In Model 1, we considered early life factors and frailty index. We  
18 then added education and income as mediators of the relationship in Model 2. All models  
19 were controlled for age, gender and health behaviours. Modification indices and model fit  
20 estimates are not facilitated in the 'gsem' command in STATA. The binary endogenous  
21 variable and paths are thus interpreted by their level of significance.

22 We performed two sensitivity analyses. We first performed regression models including early  
23 life factors, education, income, and covariates. We further handled missing data using  
24 multivariate imputation by chained equations (MICE)<sup>33</sup> (using Stata's mi program).<sup>34</sup> Twenty  
25 imputations were used. In the second supplementary analysis, we performed the same GSEM  
26 models using participants aged 60 years and over.

### 27 **Patient and public involvement**

1  
2  
3 Patients and/or the public were not involved in this study.  
4

## 5 **Results**

### 6 *Subjects*

7  
8  
9  
10 The study sample consisted of 502,489 respondents with an average age of 56.53 years  
11 (standard deviation [SD]=8.10 years) (Table 1). Just under half (45%) of the respondents were  
12 male, and most were Caucasian (94.59%). Around one-third of the respondents had graduated  
13 from college or university. The proportion of respondents whose mothers smoked regularly  
14 around the time of their birth was 29%. More than 72% of respondents were breastfed as  
15 babies, and 0.18% had perinatal diseases. The average birth weight was 3.32 kg (SD=0.67  
16 kg). 91% of the respondents were born in the UK. Just over two-thirds of subjects reported  
17 engaging in at least 10 minutes of moderate or vigorous physical activity at least three days  
18 per week; 91% consumed alcohol and 10% were current smokers.  
19  
20  
21  
22  
23  
24  
25  
26  
27  
28  
29

### 30 *Early life factors, covariates and frailty index*

31  
32  
33 In bivariate analyses, compared to those whose mothers did not smoke around birth, maternal  
34 pre and post-natal smoking was associated with a significantly higher frailty index (0.146 vs  
35 0.133) as was the presence of perinatal diseases (0.149 vs 0.138) and being born in the UK  
36 (0.138 vs 0.137). A history of breast feeding was associated with a lower frailty index (0.134  
37 vs 0.137). Higher birth weight ( $r=-0.05$ ) and shorter daylight hours at birth ( $r=-0.01$ ) were  
38 both associated with lower frailty indices. As expected, the frailty index was higher among  
39 women than among men and in those with lower educational attainment and lower income.  
40  
41  
42  
43  
44  
45  
46  
47  
48  
49  
50  
51  
52  
53  
54  
55  
56  
57  
58  
59  
60  
61  
62  
63  
64  
65  
66  
67  
68  
69  
70  
71  
72  
73  
74  
75  
76  
77  
78  
79  
80  
81  
82  
83  
84  
85  
86  
87  
88  
89  
90  
91  
92  
93  
94  
95  
96  
97  
98  
99  
100  
101  
102  
103  
104  
105  
106  
107  
108  
109  
110  
111  
112  
113  
114  
115  
116  
117  
118  
119  
120  
121  
122  
123  
124  
125  
126  
127  
128  
129  
130  
131  
132  
133  
134  
135  
136  
137  
138  
139  
140  
141  
142  
143  
144  
145  
146  
147  
148  
149  
150  
151  
152  
153  
154  
155  
156  
157  
158  
159  
160  
161  
162  
163  
164  
165  
166  
167  
168  
169  
170  
171  
172  
173  
174  
175  
176  
177  
178  
179  
180  
181  
182  
183  
184  
185  
186  
187  
188  
189  
190  
191  
192  
193  
194  
195  
196  
197  
198  
199  
200  
201  
202  
203  
204  
205  
206  
207  
208  
209  
210  
211  
212  
213  
214  
215  
216  
217  
218  
219  
220  
221  
222  
223  
224  
225  
226  
227  
228  
229  
230  
231  
232  
233  
234  
235  
236  
237  
238  
239  
240  
241  
242  
243  
244  
245  
246  
247  
248  
249  
250  
251  
252  
253  
254  
255  
256  
257  
258  
259  
260  
261  
262  
263  
264  
265  
266  
267  
268  
269  
270  
271  
272  
273  
274  
275  
276  
277  
278  
279  
280  
281  
282  
283  
284  
285  
286  
287  
288  
289  
290  
291  
292  
293  
294  
295  
296  
297  
298  
299  
300  
301  
302  
303  
304  
305  
306  
307  
308  
309  
310  
311  
312  
313  
314  
315  
316  
317  
318  
319  
320  
321  
322  
323  
324  
325  
326  
327  
328  
329  
330  
331  
332  
333  
334  
335  
336  
337  
338  
339  
340  
341  
342  
343  
344  
345  
346  
347  
348  
349  
350  
351  
352  
353  
354  
355  
356  
357  
358  
359  
360  
361  
362  
363  
364  
365  
366  
367  
368  
369  
370  
371  
372  
373  
374  
375  
376  
377  
378  
379  
380  
381  
382  
383  
384  
385  
386  
387  
388  
389  
390  
391  
392  
393  
394  
395  
396  
397  
398  
399  
400  
401  
402  
403  
404  
405  
406  
407  
408  
409  
410  
411  
412  
413  
414  
415  
416  
417  
418  
419  
420  
421  
422  
423  
424  
425  
426  
427  
428  
429  
430  
431  
432  
433  
434  
435  
436  
437  
438  
439  
440  
441  
442  
443  
444  
445  
446  
447  
448  
449  
450  
451  
452  
453  
454  
455  
456  
457  
458  
459  
460  
461  
462  
463  
464  
465  
466  
467  
468  
469  
470  
471  
472  
473  
474  
475  
476  
477  
478  
479  
480  
481  
482  
483  
484  
485  
486  
487  
488  
489  
490  
491  
492  
493  
494  
495  
496  
497  
498  
499  
500  
501  
502  
503  
504  
505  
506  
507  
508  
509  
510  
511  
512  
513  
514  
515  
516  
517  
518  
519  
520  
521  
522  
523  
524  
525  
526  
527  
528  
529  
530  
531  
532  
533  
534  
535  
536  
537  
538  
539  
540  
541  
542  
543  
544  
545  
546  
547  
548  
549  
550  
551  
552  
553  
554  
555  
556  
557  
558  
559  
560  
561  
562  
563  
564  
565  
566  
567  
568  
569  
570  
571  
572  
573  
574  
575  
576  
577  
578  
579  
580  
581  
582  
583  
584  
585  
586  
587  
588  
589  
590  
591  
592  
593  
594  
595  
596  
597  
598  
599  
600  
601  
602  
603  
604  
605  
606  
607  
608  
609  
610  
611  
612  
613  
614  
615  
616  
617  
618  
619  
620  
621  
622  
623  
624  
625  
626  
627  
628  
629  
630  
631  
632  
633  
634  
635  
636  
637  
638  
639  
640  
641  
642  
643  
644  
645  
646  
647  
648  
649  
650  
651  
652  
653  
654  
655  
656  
657  
658  
659  
660  
661  
662  
663  
664  
665  
666  
667  
668  
669  
670  
671  
672  
673  
674  
675  
676  
677  
678  
679  
680  
681  
682  
683  
684  
685  
686  
687  
688  
689  
690  
691  
692  
693  
694  
695  
696  
697  
698  
699  
700  
701  
702  
703  
704  
705  
706  
707  
708  
709  
710  
711  
712  
713  
714  
715  
716  
717  
718  
719  
720  
721  
722  
723  
724  
725  
726  
727  
728  
729  
730  
731  
732  
733  
734  
735  
736  
737  
738  
739  
740  
741  
742  
743  
744  
745  
746  
747  
748  
749  
750  
751  
752  
753  
754  
755  
756  
757  
758  
759  
760  
761  
762  
763  
764  
765  
766  
767  
768  
769  
770  
771  
772  
773  
774  
775  
776  
777  
778  
779  
780  
781  
782  
783  
784  
785  
786  
787  
788  
789  
790  
791  
792  
793  
794  
795  
796  
797  
798  
799  
800  
801  
802  
803  
804  
805  
806  
807  
808  
809  
810  
811  
812  
813  
814  
815  
816  
817  
818  
819  
820  
821  
822  
823  
824  
825  
826  
827  
828  
829  
830  
831  
832  
833  
834  
835  
836  
837  
838  
839  
840  
841  
842  
843  
844  
845  
846  
847  
848  
849  
850  
851  
852  
853  
854  
855  
856  
857  
858  
859  
860  
861  
862  
863  
864  
865  
866  
867  
868  
869  
870  
871  
872  
873  
874  
875  
876  
877  
878  
879  
880  
881  
882  
883  
884  
885  
886  
887  
888  
889  
890  
891  
892  
893  
894  
895  
896  
897  
898  
899  
900  
901  
902  
903  
904  
905  
906  
907  
908  
909  
910  
911  
912  
913  
914  
915  
916  
917  
918  
919  
920  
921  
922  
923  
924  
925  
926  
927  
928  
929  
930  
931  
932  
933  
934  
935  
936  
937  
938  
939  
940  
941  
942  
943  
944  
945  
946  
947  
948  
949  
950  
951  
952  
953  
954  
955  
956  
957  
958  
959  
960  
961  
962  
963  
964  
965  
966  
967  
968  
969  
970  
971  
972  
973  
974  
975  
976  
977  
978  
979  
980  
981  
982  
983  
984  
985  
986  
987  
988  
989  
990  
991  
992  
993  
994  
995  
996  
997  
998  
999  
1000

1  
2  
3 with a significantly lower frailty index, while maternal smoking, perinatal diseases and born  
4 in the UK had positive and significant associations with frailty index (see Figure 2A).  
5  
6

### 7 *Mediation analysis*

8  
9  
10 In the second model, education and income mediated the association between early life factors  
11 and frailty index among middle-aged and older adults, supporting the pathway hypothesis  
12 (Figure 2B). The direct effects of early life factors were diminished in comparison to the  
13 previous model. Still, the associations between being breastfed as a baby (coef.=-0.0034, z=-  
14 9.49), maternal smoking (coef.=0.0116, z=33.02), birthweight (coef.=-0.0023, z=-9.32) and  
15 frailty index remained significant after introducing adulthood characteristics. The presence of  
16 perinatal diseases (coef.=0.0132, z=3.69) and birth months with long daylight hours (coef.=-  
17 0.0007, z=-3.07) had a relatively small though significant effect on frailty (see Supplementary  
18 Table 2).  
19  
20  
21  
22  
23  
24  
25  
26  
27  
28  
29

30 Education and income mediated the links between early life factors and frailty index.  
31 Participants born in the UK had a lower probability of completing higher education (coef.=-  
32 0.7993, z=-46.07). Having been breastfed as a baby (coef.=0.1686, z=16.86) and higher birth  
33 weight (coef.=0.0779, z=11.11) were associated with higher educational attainment, while  
34 maternal smoking was associated with lower educational attainment (coef.=-0.3228, z=-  
35 31.43). Higher education was the determinant of income (coef.=1.2703, z=143.32). However,  
36 maternal smoking showed no direct relationship with income. Higher birthweight was directly  
37 associated with higher income (coef.=0.1312, z=20.46), while having been breastfed as a baby  
38 was interestingly associated with lower income (coef.=-0.1086, z=-12.16). Higher average  
39 income was significantly associated with a lower frailty index (coef.=-0.0127, z=-84.98).  
40 Higher education was also associated with a lower frailty index (coef.=-0.0051, z=-14.64).  
41  
42  
43  
44  
45  
46  
47  
48  
49  
50  
51  
52  
53  
54  
55  
56  
57  
58  
59  
60

1  
2  
3 activity levels (coef.=-0.0067, z=-42.98) and smoking (coef.=0.0192, z=35.63) were  
4 associated with a higher frailty index.  
5  
6

7  
8 In sensitivity analyses the effects of early life factors and covariates on the frailty index  
9 appeared similar in terms of both magnitude and direction when using both non-imputed and  
10 imputed data (see Supplementary Table 3). In a further analysis we included participants who  
11 were 60 years and older and found that the results were broadly similar (see Supplementary  
12 Table 4).  
13  
14  
15  
16  
17  
18

## 19 **Discussions**

20  
21 Using data from UK Biobank we found that a history of breastfeeding and higher birth weight  
22 were associated with a lower frailty index, while maternal smoking, perinatal diseases and  
23 birth month with longer day length were associated with a higher frailty index. This study  
24 provides the first evidence that educational attainment level and income may mediate the  
25 association between early life factors and frailty index.  
26  
27  
28  
29  
30  
31  
32

33 Our findings are in keeping with findings from a previous study linking birth weight and  
34 frailty index.<sup>20</sup> Our study suggests also an association between other life factors, including  
35 maternal smoking, perinatal diseases, and birth month, and frailty index in middle-aged and  
36 older adults. Early life factors have previously been linked with higher chronic disease risk  
37 later in life.<sup>35</sup> Our findings highlight the importance of early life factors in determining frailty  
38 in middle age and older men.  
39  
40  
41  
42  
43  
44  
45  
46

47 The addition of education and income as mediating variables in this study did not annul the  
48 direct effect between early life factors and frailty index. The effects of early life factors on the  
49 frailty index persist notwithstanding demographic and health behaviours. In line with our  
50 findings, Bleker and colleagues found that prenatal undernutrition is associated with poorer  
51 health in old age, including slower gait speed and lower physical functioning and the findings  
52  
53  
54  
55  
56  
57  
58  
59  
60



1  
2  
3 remained significant after inclusion of an extensive set of control variables including adult  
4 socioeconomic status.<sup>14</sup>  
5

6  
7  
8 In our analysis we observed that education levels mediate the link between early life factors  
9 and the frailty index. Early life factors have a significant relationship with educational  
10 attainment, and higher education attainment is linked to lower frailty index. This result is  
11 broadly in keeping with a prior study in Sweden which found that the associations between  
12 childhood conditions and various old age health indicators (musculoskeletal disorders,  
13 cardiovascular disease, self-rated health and impaired mobility) are mediated by education.<sup>36</sup>  
14  
15 We found that education has also a partly direct and partly indirect association with frailty  
16 index through income. This result is consistent with prior research on the biological and  
17 psychological pathways that link childhood health and socioeconomic conditions to self-  
18 reported health status among older adults in 15 European countries.<sup>21</sup> Early life health is  
19 marked by developmental plasticity; life-course trajectories of socioeconomic attainment  
20 could be altered by physical and social conditions<sup>37</sup> and set cascading physiological processes  
21 in motion, impacting health decades later.<sup>38</sup>  
22  
23

24  
25  
26 Our findings have potential implications for policies aiming at preventing frailty among older  
27 adults. Subsequent circumstances mediate the impact of early life factors on frailty later in  
28 life, and our study suggests that interventions such as improving education in midlife may  
29 mitigate early life disadvantages.  
30  
31

32  
33  
34 To our knowledge, this is the first study to examine mechanisms of the relationships between  
35 early life factors, i.e. maternal smoking, having been breastfed as a baby, low birth weight,  
36 perinatal diseases, and birth month, and the occurrence of frailty. Our findings are based on a  
37 large and well characterised cohort. There are, however, a number of limitations to be consider  
38 in interpreting the results. In this study, information concerning early life factors was based  
39 on self-report and is therefore subject to recall error. The likely effect of such error would be  
40  
41  
42  
43  
44  
45  
46  
47  
48  
49  
50  
51  
52  
53  
54  
55  
56  
57  
58  
59  
60

1  
2  
3 to underestimate the relationship between these factors and the frailty index. Data on income  
4 level was based on current income and may not necessarily represent income over the  
5  
6  
7  
8  
9  
10  
11  
12  
13  
14  
15  
16  
17  
18  
19  
20  
21  
22  
23  
24  
25  
26  
27  
28  
29  
30  
31  
32  
33  
34  
35  
36  
37  
38  
39  
40  
41  
42  
43  
44  
45  
46  
47  
48  
49  
50  
51  
52  
53  
54  
55  
56  
57  
58  
59  
60

lifecourse; furthermore, it is possible that the presence of ill health reflected in a higher frailty index may have *resulted* in reduced income rather than being a cause of it. Another limitation is that we have limited access to the health conditions of the parents. A broad range of conditions which are comprised in the frailty index bear a hereditary risk, thus taking in account for the health conditions of the parents is important in assessing the independent associations with frailty. Future studies may include the health conditions of the parents as the covariates. Finally, the data were based on a sample of predominantly Caucasian men and women and should be extrapolated beyond this group with caution.<sup>39</sup>

In conclusion, this study indicates an association between early life factors and frailty later in life. Early life conditions are important as the start of a mediated, incremental process during the life course. A comprehensive understanding of the determinants of frailty among middle-aged and older adults requires attention to exposures throughout the entire life course, with a special focus on the in utero and infancy stages and the chains of associated socioeconomic conditions that that connect over the life course. Applying a life course perspective on health in adulthood and old age should have implications for public health interventions, social policy, and further research. Early life is not the only period for any potential successful intervention; as our findings show, early life disadvantages may be offset by education and material wealth. Interventions throughout the life course, and especially during early life, could substantially reduce the health burden later in life.

### **Contributorship statement**

A.D and A.M performed the data analysis. A.D and A.M drafted the manuscript. N.P, T.W.O, M.M.C., A.P. and were involved in planning and supervised the work. All authors discussed the results and commented on the manuscript.

### **Competing interest**

All authors declare no conflicts of interest.

### **Funding**

Altug Didikoglu was supported by a grant from the Republic of Turkey Ministry of National Education. This research has been conducted using the UK Biobank Resource under Application Number 41877.

### **Data sharing statement**

Data are available in a public, open access repository. Other researchers can apply for UK Biobank data to answer specific research questions.

## References

1. United Nations. *World Population Prospects 2019: Highlights*. New York: Department of Economic and Social Affairs; 2019. Contract No.: (ST/ESA/SER.A/423).
2. Prince MJ, Wu F, Guo Y, et al. The burden of disease in older people and implications for health policy and practice. *Lancet*. 2015;385:549-562.
3. Sternberg SA, Schwartz AW, Karunananthan S, Bergman H, Clarfield MA. The identification of frailty: a systematic literature review. *J Am Geriatr Soc*. 2011;59:2129-2138.
4. Daniels R, van Rossum E, de Witte L, Kempen GI, van den Heuvel W. Interventions to prevent disability in frail community-dwelling elderly: a systematic review. *BMC Health Serv Res*. 2008;8:278.
5. Hogan DB. Models, definitions, and criteria for frailty. *Conn's Handbook of Models for Human Aging*. 2018:35-44.
6. Rockwood K, Mitnitski A. Frailty defined by deficit accumulation and geriatric medicine defined by frailty. *Clin Geriatr Med*. 2011;27:17-26.
7. O’Caoimh R, Sezgin D, O’Donovan MR, et al. Prevalence of frailty in 62 countries across the world: a systematic review and meta-analysis of population-level studies. *Age and Ageing*. 2021;50:96-104.
8. Hanlon P, Nicholl BI, Jani BD, Lee D, McQueenie R, Mair FS. Frailty and pre-frailty in middle-aged and older adults and its association with multimorbidity and mortality: a prospective analysis of 493 737 UK Biobank participants. *Lancet Public Health*. 2018;3:e323-e332.
9. Cegri F, Orfila F, Abellana RM, Pastor-Valero M. The Impact of Frailty on Admission to Home Care Services And Nursing Homes: Eight-Year Follow-Up

- 1  
2  
3 Of A Community-Dwelling, Older Adult, Spanish Cohort. *BMC Geriatrics*.  
4  
5 2020;20:1-13.  
6  
7  
8 10. Ensrud KE, Ewing SK, Taylor BC, et al. Frailty and risk of falls, fracture, and  
9  
10 mortality in older women: the study of osteoporotic fractures. *J Gerontol A Biol*  
11  
12 *Sci Med Sci*. 2007;62:744-51.  
13  
14 11. Barker DJ. Fetal origins of coronary heart disease. *BMJ*. 1995;311:171-4.  
15  
16 12. Eriksson JG. Developmental origins of health and disease—from a small body  
17  
18 size at birth to epigenetics. *Ann Med*. 2016;48:456-467.  
19  
20 13. Kuh D, Hardy R, Butterworth S, et al. Developmental origins of midlife grip  
21  
22 strength: findings from a birth cohort study. *J Gerontol A Biol Sci Med Sci*.  
23  
24 2006;61:702-6.  
25  
26 14. Bleker LS, de Rooij SR, Painter RC, van der Velde N, Roseboom TJ. Prenatal  
27  
28 undernutrition and physical function and frailty at the age of 68 years: the Dutch  
29  
30 Famine Birth Cohort Study. *J Gerontol A Biol Sci Med Sci*. 2016;71:1306-14.  
31  
32 15. Doherty S, Grabowski J, Hoffman C, Ng S, Zelikoff J. Early life insult from  
33  
34 cigarette smoke may be predictive of chronic diseases later in life. *Biomarkers*.  
35  
36 2009;14 Suppl 1:97-101.  
37  
38 16. Horta BL, Loret de Mola C, Victora CG. Long-term consequences of  
39  
40 breastfeeding on cholesterol, obesity, systolic blood pressure and type 2 diabetes:  
41  
42 a systematic review and meta-analysis. *Acta Paediatr*. 2015;104:30-7.  
43  
44 17. Zhang Y, Devore EE, Strohmaier S, Grodstein F, Schernhammer ES. Birth  
45  
46 month, birth season, and overall and cardiovascular disease mortality in US  
47  
48 women: prospective cohort study. *BMJ*. 2019;367.  
49  
50  
51  
52  
53  
54  
55  
56  
57  
58  
59  
60

- 1  
2  
3 18. Zhang B-B, Zhao G-A, Yang M, et al. Birth month associates with risk of  
4 coronary artery disease and its complications: A propensity score matched  
5 analysis. *Med Clin (Barc)*. 2019;153:454-459.  
6  
7
- 8  
9  
10 19. Shalev I, Caspi A, Ambler A, et al. Perinatal complications and aging indicators  
11 by midlife. *Pediatrics*. 2014;134:e1315-e23.  
12  
13
- 14 20. Haapanen M, Perälä M, Salonen M, et al. Early life determinants of frailty in old  
15 age: the Helsinki Birth Cohort Study. *Age and Ageing*. 2018;47:569-75.  
16  
17
- 18 21. Pakpahan E, Hoffmann R, Kröger H. The long arm of childhood circumstances  
19 on health in old age: Evidence from SHARELIFE. *Advances in Life Course*  
20 *Research*. 2017;31:1-10.  
21  
22
- 23 22. Power C, Hertzman C. Social and biological pathways linking early life and  
24 adult disease. *Br Med Bull*. 1997;53(1):210-21.  
25  
26
- 27 23. Julvez J, Ribas-Fitó N, Torrent M, Forns M, Garcia-Esteban R, Sunyer J.  
28 Maternal smoking habits and cognitive development of children at age 4 years in  
29 a population-based birth cohort. *Int J Epidemiol*. 2007;36(4):825-32.  
30  
31
- 32 24. Conley D, Bennett NG. Is biology destiny? Birth weight and life chances.  
33 *American Sociological Review*. 2000:458-67.  
34  
35
- 36 25. Lang IA, Hubbard RE, Andrew MK, Llewellyn DJ, Melzer D, Rockwood K.  
37 Neighborhood deprivation, individual socioeconomic status, and frailty in older  
38 adults. *J Am Geriatr Soc*. 2009;57:1776-80.  
39  
40
- 41 26. Etman A, Burdorf A, Van der Cammen TJ, Mackenbach JP, Van Lenthe FJ.  
42 Socio-demographic determinants of worsening in frailty among community-  
43 dwelling older people in 11 European countries. *J Epidemiol Community Health*.  
44  
45  
46  
47  
48  
49  
50  
51  
52  
53  
54  
55  
56  
57  
58  
59  
60

- 1
- 2
- 3 27. Sudlow C, Gallacher J, Allen N, et al. UK biobank: an open access resource for
- 4
- 5 identifying the causes of a wide range of complex diseases of middle and old
- 6
- 7 age. *PLoS Medicine*. 2015;12:e1001779.
- 8
- 9
- 10 28. Didikoglu A, Maharani A, Pendleton N, Canal MM, Payton A. Early life factors
- 11
- 12 and COVID-19 infection in England: A prospective analysis of UK Biobank
- 13
- 14 participants. *Early Human Development*. 2021;155:105326.
- 15
- 16
- 17 29. Williams DM, Jylhävä J, Pedersen NL, Hägg S. A frailty index for UK Biobank
- 18
- 19 participants. *J Gerontol A Biol Sci Med Sci*. 2019;74:582-587.
- 20
- 21
- 22 30. Amorim LDAF, Fiaccone RL, Santos CAS, et al. Structural equation modeling
- 23
- 24 in epidemiology. *Cad Saude Publica*. 2010;26:2251-2262.
- 25
- 26
- 27 31. Zhang L, Zhang J. Perception of small tourism enterprises in Lao PDR regarding
- 28
- 29 social sustainability under the influence of social network. *Tourism*
- 30
- 31 *Management*. 2018;69:109-120.
- 32
- 33
- 34 32. McCullagh P. *Generalized linear models*: Routledge; 2019.
- 35
- 36 33. Azur MJ, Stuart EA, Frangakis C, Leaf PJ. Multiple imputation by chained
- 37
- 38 equations: what is it and how does it work? *Int J Methods Psychiatr Res*.
- 39
- 40 2011;20:40–49.
- 41
- 42
- 43 34. StataCorp. *Stata Multiple-Imputation Reference Manual Release 15*. College
- 44
- 45 Station, TX2017.
- 46
- 47 35. Michels KB. Early life predictors of chronic disease. *J Womens Health*
- 48
- 49 *(Larchmt)*. 2003;12:157-61.
- 50
- 51
- 52 36. Berndt H, Fors S. Childhood living conditions, education and health among the
- 53
- 54 oldest old in Sweden. *Ageing and Society*. 2016;36:631.
- 55
- 56
- 57 37. Haas SA, Glymour MM, Berkman LF. Childhood health and labor market
- 58
- 59 inequality over the life course. *J Health Soc Behav*. 2011;52:298-313.
- 60

- 1  
2  
3 38. Montez JK, Hayward MD. Early life conditions and later life mortality.  
4  
5 International Handbook of Adult Mortality: Springer; 2011. p. 187-206.  
6  
7  
8 39. Fry A, Littlejohns TJ, Sudlow C, et al. Comparison of sociodemographic and  
9  
10 health-related characteristics of UK Biobank participants with those of the  
11  
12 general population. *Am J Epidemiol.* 2017;186:1026-1034.  
13  
14  
15  
16  
17  
18  
19  
20  
21  
22  
23  
24  
25  
26  
27  
28  
29  
30  
31  
32  
33  
34  
35  
36  
37  
38  
39  
40  
41  
42  
43  
44  
45  
46  
47  
48  
49  
50  
51  
52  
53  
54  
55  
56  
57  
58  
59  
60

For peer review only



1  
2  
3 **List of the figures**  
4

5 **Figure 1** The pathways of early life factors and impact on frailty among adults  
6

7 **Figure 2** Generalised structural equation models to identify (A) the association between  
8 early life factors and frailty index and (B) education and income as mediators of the  
9 relationship between early life factors and frailty index. Note: \*Significant at 0.05; †  
10 Significant at 0.0001  
11  
12  
13  
14  
15  
16  
17  
18  
19  
20  
21  
22  
23  
24  
25  
26  
27  
28  
29  
30  
31  
32  
33  
34  
35  
36  
37  
38  
39  
40  
41  
42  
43  
44  
45  
46  
47  
48  
49  
50  
51  
52  
53  
54  
55  
56  
57  
58  
59  
60

For peer review only

**Table 1.** Subject characteristics (n=502,489)

| Variable                         | Percentage<br>or mean<br>(SD)* | Mean (SD) of<br>frailty index** | Bivariate<br>association with<br>frailty index*** |
|----------------------------------|--------------------------------|---------------------------------|---------------------------------------------------|
| Frailty index, mean (SD)         | 0.14(0.08)                     |                                 |                                                   |
| <i>Early-life factors</i>        |                                |                                 |                                                   |
| Maternal smoking around birth, % |                                |                                 | p<0.0001                                          |
| No                               | 70.75%                         | 0.133(0.073)                    |                                                   |
| Yes                              | 29.25%                         | 0.146(0.078)                    |                                                   |
| Breastfed as a baby, %           |                                |                                 | p<0.0001                                          |
| No                               | 27.65%                         | 0.137(0.076)                    |                                                   |
| Yes                              | 72.35%                         | 0.134(0.074)                    |                                                   |
| Birthweight (kg), mean (SD)      | 3.32(0.67)                     |                                 | R=-0.05, p<0.0001                                 |
| Birth month, %                   |                                |                                 | p=0.0002                                          |
| January                          | 8.44%                          | 0.138(0.076)                    |                                                   |
| February                         | 7.96%                          | 0.137(0.075)                    |                                                   |
| March                            | 8.98%                          | 0.138(0.075)                    |                                                   |
| April                            | 8.59%                          | 0.139(0.076)                    |                                                   |
| May                              | 8.98%                          | 0.138(0.076)                    |                                                   |
| June                             | 8.45%                          | 0.139(0.076)                    |                                                   |
| July                             | 8.48%                          | 0.139(0.076)                    |                                                   |
| August                           | 8.24%                          | 0.138(0.076)                    |                                                   |
| September                        | 8.14%                          | 0.138(0.075)                    |                                                   |
| October                          | 8.06%                          | 0.137(0.076)                    |                                                   |
| November                         | 7.63%                          | 0.137(0.075)                    |                                                   |
| December                         | 8.03%                          | 0.138(0.076)                    |                                                   |
| Perinatal diseases, %            |                                |                                 | p<0.0001                                          |
| No                               | 99.82%                         | 0.138(0.075)                    |                                                   |
| Yes                              | 0.18%                          | 0.149(0.084)                    |                                                   |
| Born in the UK, %                |                                |                                 | p=0.0381                                          |
| No                               | 8.96%                          | 0.137(0.076)                    |                                                   |
| Yes                              | 91.04%                         | 0.138(0.075)                    |                                                   |
| <i>Sociodemographics</i>         |                                |                                 |                                                   |

|                                              |             |               |                  |
|----------------------------------------------|-------------|---------------|------------------|
| Age (years), mean (SD)                       | 56.53(8.10) |               | R=0.16, p<0.0001 |
| Gender, %                                    |             |               | p<0.0001         |
| Female                                       | 54.40%      | 0.141(0.075)  |                  |
| Male                                         | 45.60%      | 0.134(0.075)  |                  |
| Ethnicity, %                                 |             |               | p<0.0001         |
| Other                                        | 5.41%       | 0.140(0.078)  |                  |
| Caucasian                                    | 94.59%      | 0.137(0.075)  |                  |
| Education, %                                 |             |               | p<0.0001         |
| Less than college                            | 67.27%      | 0.145(0.077)  |                  |
| College or university degree                 | 32.73%      | 0.122 (0.068) |                  |
| Average total household income before tax, % |             |               | p<0.0001         |
| Less than £18,000                            | 22.85%      | 0.171(0.083)  |                  |
| £18,000 to £30,999                           | 25.43%      | 0.140(0.072)  |                  |
| £31,000 to £51,999                           | 26.04%      | 0.125(0.067)  |                  |
| £52,000 to £100,000                          | 20.28%      | 0.113(0.062)  |                  |
| Greater than £100,000                        | 5.39%       | 0.102(0.059)  |                  |
| <i>Health behaviours</i>                     |             |               |                  |
| Moderate or vigorous physical activity, %    |             |               | p<0.0001         |
| None                                         | 10.75%      | 0.160(0.084)  |                  |
| 1 day                                        | 7.11%       | 0.133(0.072)  |                  |
| 2 days                                       | 13.40%      | 0.132(0.072)  |                  |
| 3 days or more                               | 68.75%      | 0.134(0.073)  |                  |
| Current alcohol consumption, %               |             |               | p<0.0001         |
| No                                           | 8.08%       | 0.166(0.087)  |                  |
| Yes                                          | 91.92%      | 0.135(0.073)  |                  |
| Current smoking, %                           |             |               | p<0.0001         |
| No                                           | 89.39%      | 0.135(0.074)  |                  |
| Yes                                          | 10.61%      | 0.159(0.083)  |                  |

**Note:** \* Presented are means (standard deviation) for continuous variables and percentages for categorical variables. The maternal smoking variable includes 13.86% missing data, the breastfed as a baby variable includes 23.64% missing data, the birthweight variable includes

1  
2  
3 44.88% missing data, the education variable includes 2.02% missing data, the average total  
4 household income before tax variable includes 15.36% missing data, and the moderate or  
5 vigorous physical activity variable includes 2.43% missing data. \*\* Presented are the means  
6 (standard deviation) of the frailty index per group. \*\*\* Bivariate analyses are unpaired t-  
7 tests for binary variables, ANOVA for ordinal variables, and Pearson's correlation for  
8 continuous variables.  
9  
10  
11  
12  
13  
14  
15  
16  
17  
18  
19  
20  
21  
22  
23  
24  
25  
26  
27  
28  
29  
30  
31  
32  
33  
34  
35  
36  
37  
38  
39  
40  
41  
42  
43  
44  
45  
46  
47  
48  
49  
50  
51  
52  
53  
54  
55  
56  
57  
58  
59  
60

For peer review only

1  
2  
3  
4  
5  
6  
7  
8  
9  
10  
11  
12  
13  
14  
15  
16  
17  
18  
19  
20  
21  
22  
23  
24  
25  
26  
27  
28  
29  
30  
31  
32  
33  
34  
35  
36  
37  
38  
39  
40  
41  
42  
43  
44  
45  
46  
47  
48  
49  
50  
51  
52  
53  
54  
55  
56  
57  
58  
59  
60

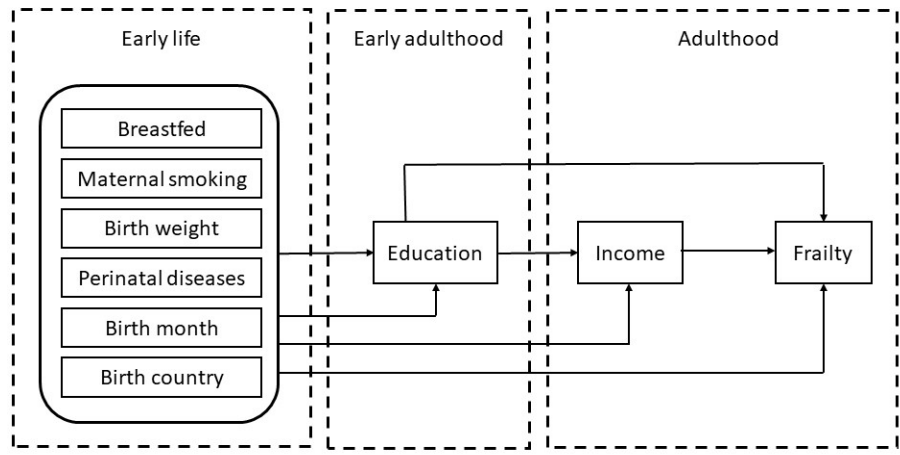

Figure 1 The pathways of early life factors and impact on frailty among adults  
275x190mm (96 x 96 DPI)

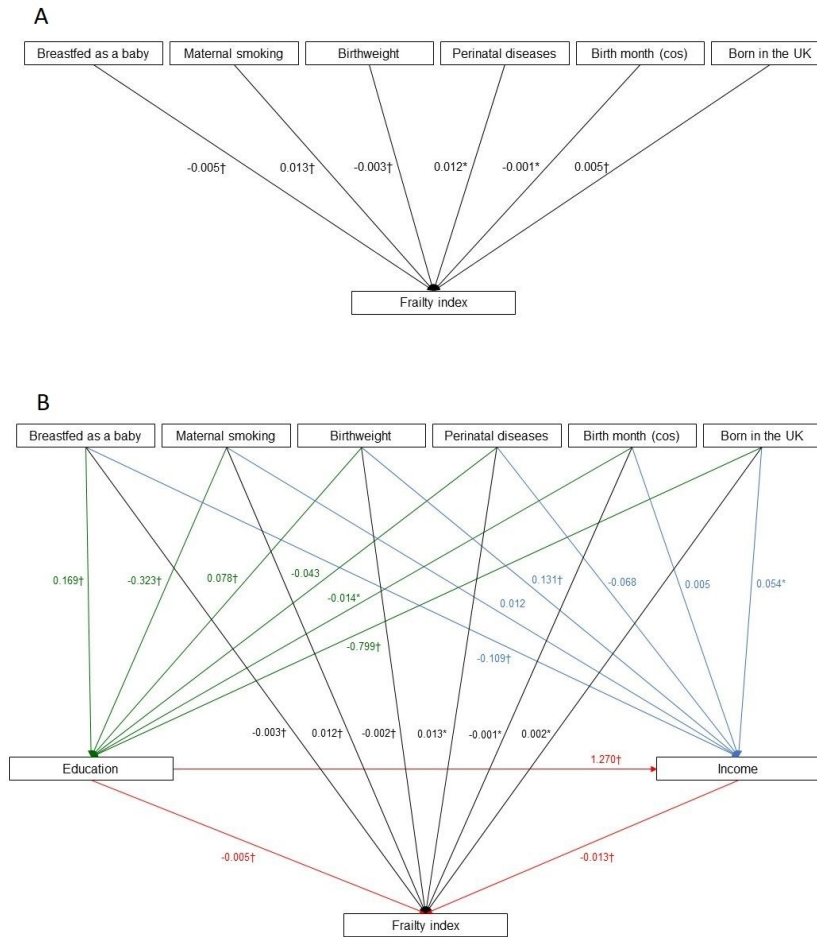

Figure 2 Generalised structural equation models to identify (A) the association between early life factors and frailty index and (B) education and income as mediators of the relationship between early life factors and frailty index. Note: \*Significant at 0.05; † Significant at 0.0001

279x399mm (96 x 96 DPI)

## Supplementary Material: Pathways linking early life factors and frailty among middle-aged and older adults in England: Findings from UK Biobank

**Supplementary Table 1.** Variables included in the UK Biobank frailty indices

| Item | Variable                                  | Definition                                                                                                                      | Coding                                                                  |
|------|-------------------------------------------|---------------------------------------------------------------------------------------------------------------------------------|-------------------------------------------------------------------------|
|      | Sensory                                   |                                                                                                                                 |                                                                         |
| 1    | Glaucoma                                  | Self-report of physician-diagnosed glaucoma                                                                                     | 0=no; 1=yes                                                             |
| 2    | Cataracts                                 | Self-report of physician-diagnosed glaucoma                                                                                     | 0=no; 1=yes                                                             |
| 3    | Hearing difficulty                        | Self-report experiencing hearing difficulty                                                                                     | 0=no; 1=yes/completely deaf                                             |
|      | Cranial                                   |                                                                                                                                 |                                                                         |
| 4    | Migraine                                  | Self-report of physician-diagnosed migraine                                                                                     | 0=no; 1=yes                                                             |
| 5    | Dental problems                           | Self-report of physician-diagnosed dental problems, i.e., ulcers, painful gums, bleeding gums, loose teeth, toothache, dentures | 0=none; 1=any                                                           |
|      | Mental well-being                         |                                                                                                                                 |                                                                         |
| 6    | Self-rated health                         | Self-rated health in 4 Likert scale                                                                                             | 0=excellent; 0.25=good; 0.5=fair; 1=poor                                |
| 7    | Fatigue                                   | Self-report of frequency of tiredness / lethargy in last two weeks                                                              | 0=not at all; 0.25=several days; 0.5=more than half; 1=nearly every day |
| 8    | Sleep                                     | Self-report experiencing of sleeplessness/ insomnia                                                                             | 0=never/rarely; 0.5=sometimes; 1=usually                                |
| 9    | Depressed feelings                        | Self-report of frequency having depressed feeling in last two weeks                                                             | 0=not at all; 0.5=several days; 0.75=more than half; 1=nearly every day |
| 10   | Self-described nervous personality        | Self-report of having nervous personality                                                                                       | 0=no; 1=yes                                                             |
| 11   | Severe anxiety/ panic attacks             | Self-report of physician-diagnosed severe anxiety/panic attacks                                                                 | 0=no; 1=yes                                                             |
| 12   | Common to feel loneliness                 | Self-report of feeling lonely commonly                                                                                          | 0=no; 1=yes                                                             |
| 13   | Sense of misery (ever/never)              | Self-report of ever having sense of misery                                                                                      | 0=no; 1=yes                                                             |
|      | Infirmity                                 |                                                                                                                                 |                                                                         |
| 14   | Infirmity                                 | Self-report of having long-standing illness or disability                                                                       | 0=no; 1=yes                                                             |
| 15   | Falls in last year                        | Self-report of experiencing falls last year                                                                                     | 0=no falls; 0.5=one fall; 1=more than one fall                          |
| 16   | Fractures/broken bones in last five years | Self-report of experiencing fractures/broken bones in last five years                                                           | 0=no; 1=yes                                                             |
|      | Cardiometabolic                           |                                                                                                                                 |                                                                         |
| 17   | Diabetes                                  | Self-report of physician-diagnosed diabetes                                                                                     | 0=no; 1=yes                                                             |
| 18   | Myocardial infarction                     | Self-report of physician-diagnosed myocardial infarction                                                                        | 0=no; 1=yes                                                             |
| 19   | Angina                                    | Self-report of physician-diagnosed angina                                                                                       | 0=no; 1=yes                                                             |
| 20   | Stroke                                    | Self-report of physician-diagnosed stroke                                                                                       | 0=no; 1=yes                                                             |
| 21   | High blood pressure                       | Self-report of physician-diagnosed high blood pressure                                                                          | 0=no; 1=yes                                                             |
| 22   | Hypothyroidism                            | Self-report of physician-diagnosed hypothyroidism                                                                               | 0=no; 1=yes                                                             |
| 23   | Deep-vein thrombosis                      | Self-report of physician-diagnosed deep-vein thrombosis                                                                         | 0=no; 1=yes                                                             |
| 24   | High cholesterol                          | Self-report of physician-diagnosed high cholesterol                                                                             | 0=no; 1=yes                                                             |

|    |                                              |                                                                           |                                                 |
|----|----------------------------------------------|---------------------------------------------------------------------------|-------------------------------------------------|
|    | Respiratory                                  |                                                                           |                                                 |
| 25 | Breathing                                    | Self-report of having wheeze in last year                                 | 0=no; 1=yes                                     |
| 26 | Pneumonia                                    | Self-report of physician-diagnosed pneumonia                              | 0=no; 1=yes                                     |
| 27 | Chronic bronchitis/emphysema                 | Self-report of physician-diagnosed chronic bronchitis/emphysema           | 0=no; 1=yes                                     |
| 28 | Asthma                                       | Self-report of physician-diagnosed asthma                                 | 0=no; 1=yes                                     |
|    | Musculoskeletal                              |                                                                           |                                                 |
| 29 | Rheumatoid arthritis                         | Self-report of physician-diagnosed rheumatoid arthritis                   | 0=no; 1=yes                                     |
| 30 | Osteoarthritis                               | Self-report of physician-diagnosed osteoarthritis                         | 0=no; 1=yes                                     |
| 31 | Gout                                         | Self-report of physician-diagnosed gout                                   | 0=no; 1=yes                                     |
| 32 | Osteoporosis                                 | Self-report of physician-diagnosed osteoporosis                           | 0=no; 1=yes                                     |
|    | Immunological                                |                                                                           |                                                 |
| 33 | Hay fever, allergic rhinitis or eczema       | Self-report of physician-diagnosed hay fever, allergic rhinitis or eczema | 0=no; 1=yes                                     |
| 34 | Psoriasis                                    | Self-report of physician-diagnosed psoriasis                              | 0=no; 1=yes                                     |
|    | Cancer                                       |                                                                           |                                                 |
| 35 | Any cancer diagnosis                         | Self-report of physician-diagnosed any cancer                             | 0=no; 1=yes                                     |
| 36 | Multiple cancers diagnosed (number reported) | Self-report of physician-diagnosed multiple cancer                        | 0=no cancer or single cancer; 1=multiple cancer |
|    | Pain                                         |                                                                           |                                                 |
| 37 | Chest pain                                   | Self-report of ever experiencing chest pain                               | 0=no; 1=yes                                     |
| 38 | Head and/or neck pain                        | Self-report of ever experiencing head and/or neck pain                    | 0=no; 1=yes                                     |
| 39 | Back pain                                    | Self-report of ever experiencing back pain                                | 0=no; 1=yes                                     |
| 40 | Stomach/abdominal pain                       | Self-report of ever experiencing stomach/abdominal pain                   | 0=no; 1=yes                                     |
| 41 | Hip pain                                     | Self-report of ever experiencing hip pain                                 | 0=no; 1=yes                                     |
| 42 | Knee pain                                    | Self-report of ever experiencing knee pain                                | 0=no; 1=yes                                     |
| 43 | Whole-body pain                              | Self-report of ever experiencing whole-body pain                          | 0=no; 1=yes                                     |
| 44 | Facial pain                                  | Self-report of ever experiencing facial pain                              | 0=no; 1=yes                                     |
| 45 | Sciatica                                     | Self-report of physician-diagnosed sciatica                               | 0=no; 1=yes                                     |
|    | Gastrointestinal                             |                                                                           |                                                 |
| 46 | Gastric reflux                               | Self-report of physician-diagnosed gastric reflux                         | 0=no; 1=yes                                     |
| 47 | Hiatus hernia                                | Self-report of physician-diagnosed hiatus hernia                          | 0=no; 1=yes                                     |
| 48 | Gall stones                                  | Self-report of physician-diagnosed gall stones                            | 0=no; 1=yes                                     |
| 49 | Diverticulitis                               | Self-report of physician-diagnosed diverticulitis                         | 0=no; 1=yes                                     |

Notes: Deficit points are summed for each individual, and divided by the total number of deficits, to produce a frailty index with a range from 0 to 1.



**Supplementary Table 2.** Generalized structural equation models of frailty

|                   |  | <i>Model 1</i>                       | <i>Model 2</i>                       |
|-------------------|--|--------------------------------------|--------------------------------------|
|                   |  | Coef.(95%CI);z                       | Coef.(95%CI);z                       |
| Frailty           |  | N=216,947                            | N=190,575                            |
| Breastfed as a    |  |                                      |                                      |
| baby              |  | -0.0052(-0.0059,-0.0046)†;z=-15.3833 | -0.0034(-0.0041,-0.0027)†;z=-9.4877  |
| Maternal          |  |                                      |                                      |
| smoking           |  | 0.0129(0.0122,0.0135)†;z=37.8771     | 0.0116(0.0109,0.0123)†;z=33.0189     |
| Birthweight (kg)  |  | -0.0031(-0.0036,-0.0026)†;z=-12.9125 | -0.0023(-0.0028,-0.0018)†;z=-9.3223  |
| Perinatal         |  |                                      |                                      |
| diseases          |  | 0.0121(0.0054,0.0189)*;z=3.5050      | 0.0132(0.0062,0.0203)*;z=3.6882      |
| Birth month       |  |                                      |                                      |
| (cos)             |  | -0.0007(-0.0011,-0.0003)*;z=-3.2108  | -0.0007(-0.0011,-0.0002)*;z=-3.0659  |
| Born in the UK    |  | 0.0052(0.0039,0.0065)†;z=7.7218      | 0.0018(0.0004,0.0031)*;z=2.5152      |
| Education         |  |                                      | -0.0051(-0.0057,-0.0044)†;z=-14.6416 |
| Income            |  |                                      | -0.0127(-0.0130,-0.0124)†;z=-84.9808 |
| Age (years)       |  | 0.0016(0.0016,0.0017)†;z=84.5320     | 0.0010(0.0009,0.0010)†;z=45.1147     |
| Male              |  | -0.0085(-0.0091,-0.0079)†;z=-26.8101 | -0.0056(-0.0062,-0.0050)†;z=-17.0706 |
| Caucasian         |  |                                      |                                      |
| ethnicity         |  | -0.0074(-0.0093,-0.0056)†;z=-7.7653  | -0.0020(-0.0040,-0.0000)*;z=-1.9706  |
| Smoking           |  | 0.0263(0.0253,0.0273)†;z=50.9897     | 0.0192(0.0181,0.0202)†;z=35.6251     |
| Alcohol drinking  |  | -0.0270(-0.0282,-0.0258)†;z=-44.5585 | -0.0209(-0.0221,-0.0196)†;z=-32.2058 |
| Physical activity |  | -0.0064(-0.0067,-0.0061)†;z=-42.2411 | -0.0067(-0.0070,-0.0064)†;z=-42.9813 |
| Education         |  |                                      | N=219,881                            |
| Breastfed as a    |  |                                      |                                      |
| baby              |  |                                      | 0.1686(0.1490,0.1882)†;z=16.8596     |
| Maternal          |  |                                      |                                      |
| smoking           |  |                                      | -0.3228(-0.3429,-0.3027)†;z=-31.4289 |
| Birthweight (kg)  |  |                                      | 0.0779(0.0641,0.0916)†;z=11.1100     |
| Perinatal         |  |                                      |                                      |
| diseases          |  |                                      | -0.0426(-0.2423,0.1572);z=-0.4179    |
| Birth month       |  |                                      |                                      |
| (cos)             |  |                                      | 0.0137(0.0013,0.0262)*;z=2.1573      |
| Born in the UK    |  |                                      | -0.7993(-0.8333,-0.7653)†;z=-46.0706 |
| Income            |  |                                      | N=194,800                            |
| Breastfed as a    |  |                                      |                                      |
| baby              |  |                                      | -0.1086(-0.1262,-0.0911)†;z=-12.1634 |
| Maternal          |  |                                      |                                      |
| smoking           |  |                                      | 0.0123(-0.0055,0.0301);z=1.3581      |
| Birthweight (kg)  |  |                                      | 0.1312(0.1186,0.1438)†;z=20.4590     |
| Perinatal         |  |                                      |                                      |
| diseases          |  |                                      | -0.0675(-0.2483,0.1132);z=-0.7322    |
| Birth month       |  |                                      |                                      |
| (cos)             |  |                                      | 0.0051(-0.0062,0.0164);z=0.8909      |
| Born in the UK    |  |                                      | 0.0541(0.0209,0.0873)*;z=3.1929      |
| Education         |  |                                      | 1.2703(1.2530,1.2877)†;z=143.3220    |

\*Significant at 0.05; † Significant at 0.0001

Generalized structural equation models: Frailty (Gaussian; identity), Education (Bernoulli, logit), Income (Ordinal, logit).

Model 1 includes early life predictors controlled with age, gender, ethnicity, smoking, alcohol drinking and physical activity covariates. Model 2 includes early life predictors controlled with age, gender, ethnicity, smoking, alcohol drinking and physical activity covariates, and education and income mediators.

**Supplementary Table 3.** Sensitivity analysis: Regression models predicting frailty index

|                     | Non-imputed data <sup>1</sup><br>(n=190,575) | Imputed data <sup>1</sup><br>(n=502,489) |
|---------------------|----------------------------------------------|------------------------------------------|
| Breastfed as a baby | -0.0034(-0.0041,-0.0027)†                    | -0.0042(-0.0047,-0.0036)†                |
| Maternal smoking    | 0.0116(0.0109,0.0123)†                       | 0.0125(0.0120,0.0130)†                   |
| Birthweight (kg)    | -0.0023(-0.0028,-0.0018)†                    | -0.0024(-0.0028,-0.0020)†                |
| Perinatal diseases  | 0.0132(0.0062,0.0203)*                       | 0.0093(0.0046,0.0140)†                   |
| Birth month (cos)   | -0.0007(-0.0011,-0.0002)*                    | -0.0006(-0.0009,-0.0003)†                |
| Born in the UK      | 0.0018(0.0004,0.0031)*                       | 0.0001(-0.0008,0.0010)                   |
| Education           | -0.0051(-0.0057,-0.0044)†                    | -0.0060(-0.0064,-0.0055)†                |
| Income              | -0.0127(-0.0130,-0.0124)†                    | -0.0139(-0.0141,-0.0137)†                |
| Age (years)         | 0.0010(0.0009,0.0010)†                       | 0.0009(0.0009,0.0010)†                   |
| Male                | -0.0056(-0.0062,-0.0050)†                    | -0.0045(-0.0049,-0.0041)†                |
| Caucasian ethnicity | -0.0020(-0.0040,-0.0001)*                    | -0.0015(-0.0026,-0.0004)*                |
| Smoking             | 0.0192(0.0181,0.0202)†                       | 0.0194(0.0187,0.0201)†                   |
| Alcohol drinking    | -0.0209(-0.0221,-0.0196)†                    | -0.0203(-0.0210,-0.0195)†                |
| Physical activity   | -0.0067 (-0.0070,-0.0064)†                   | -0.0074(-0.0076,-0.0072)†                |
| Intercept           | 0.1578(0.1542,0.1614)†                       | 0.1672(0.1650,0.1694)†                   |

Note: <sup>1</sup> presented are coefficients (95% confidence intervals); \*Significant at 0.05; † Significant at 0.0001. Non-imputed analysis was based on 190,575 respondents with complete information on all variables. Maternal smoking around birth variable has 13.86% missing data, breastfed as a baby variable has 23.64% missing data, birthweight variable has 44.88% missing data, education variable has 2.02% missing data, average total household income before tax variable has 15.36% missing data, moderate or vigorous physical activity variable has 2.43% missing data. The imputed analysis included all the respondents (n=502,489).

**Supplementary Table 4.** Generalized structural equation models of frailty for participants who have age above 60 years old

|                     |  | <i>Model 1</i>                | <i>Model 2</i>                |
|---------------------|--|-------------------------------|-------------------------------|
|                     |  | Coef.(95%CI)                  | Coef.(95%CI)                  |
| Frailty             |  | N=73,941                      | N= 61,431                     |
| Breastfed as a baby |  | -0.0041(-0.0054,-<br>0.0028)† | -0.0029(-0.0043,-<br>0.0015)† |
| Maternal smoking    |  | 0.0122(0.0110,0.0134)†        | 0.0114(0.0101,0.0127)†        |
| Birthweight (kg)    |  | -0.0022(-0.0030,-<br>0.0014)† | -0.0020(-0.0029,-<br>0.0012)† |
| Perinatal diseases  |  | 0.0129(-0.0003,0.0261)        | 0.0148(0.0007,0.0290)*        |
| Birth month (cos)   |  | -0.0007(-0.0014,0.0001)       | -0.0006(-0.0014,0.0002)       |
| Born in the UK      |  | 0.0053(0.0026,0.0080)*        | 0.0001(-0.0029,0.0030)        |
| Education           |  |                               | -0.0069(-0.0082,-<br>0.0056)† |
| Income              |  |                               | -0.0111(-0.0117,-<br>0.0105)† |
| Age (years)         |  | 0.0026(0.0024,0.0028)†        | 0.0017(0.0015,0.0019)†        |
| Male                |  | -0.0055(-0.0066,-<br>0.0044)† | -0.0017(-0.0029,-<br>0.0005)* |
| Caucasian ethnicity |  | -0.0119(-0.0167,-<br>0.0071)† | -0.0083(-0.0136,-<br>0.0030)* |
| Smoking             |  | 0.0213(0.0193,0.0234)†        | 0.0165(0.0143,0.0187)†        |
| Alcohol drinking    |  | -0.0250(-0.0269,-<br>0.0230)† | -0.0207(-0.0229,-<br>0.0186)† |
| Physical activity   |  | -0.0079(-0.0085,-<br>0.0073)† | -0.0078(-0.0084,-<br>0.0072)† |
| Education           |  |                               | N=75,181                      |
| Breastfed as a baby |  |                               | 0.1838(0.1438,0.2237)†        |
| Maternal smoking    |  |                               | -0.1563(-0.1934,-<br>0.1193)† |
| Birthweight (kg)    |  |                               | 0.0471(0.0237,0.0704)†        |
| Perinatal diseases  |  |                               | -0.1852(-0.5974,0.2271)       |
| Birth month (cos)   |  |                               | 0.0125(-0.0101,0.0352)        |
| Born in the UK      |  |                               | -0.7936(-0.8590,-<br>0.7282)† |
| Income              |  |                               | N=62,967                      |
| Breastfed as a baby |  |                               | 0.0843(0.0495,0.1191)†        |
| Maternal smoking    |  |                               | 0.0403(0.0079,0.0726)*        |
| Birthweight (kg)    |  |                               | 0.0919(0.0709,0.1129)†        |
| Perinatal diseases  |  |                               | -0.3311(-0.6857,0.0235)       |
| Birth month (cos)   |  |                               | 0.0282(0.0080,0.0484)*        |
| Born in the UK      |  |                               | -0.1172(-0.1840,-<br>0.0504)* |
| Education           |  |                               | 1.3530(1.3208,1.3852)†        |

\*Significant at 0.05; † Significant at 0.0001

Generalized structural equation models: Frailty (Gaussian; identity), Education (Bernoulli, logit), Income (Ordinal, logit).

Model 1 includes early life predictors controlled with age, gender, ethnicity, smoking, alcohol drinking and physical activity covariates. Model 2 includes early life predictors controlled with age, gender, ethnicity, smoking, alcohol drinking and physical activity covariates, and education and income mediators.

# Reporting checklist for cross sectional study.

Based on the STROBE cross sectional guidelines.

## Instructions to authors

Complete this checklist by entering the page numbers from your manuscript where readers will find each of the items listed below.

Your article may not currently address all the items on the checklist. Please modify your text to include the missing information. If you are certain that an item does not apply, please write "n/a" and provide a short explanation.

Upload your completed checklist as an extra file when you submit to a journal.

In your methods section, say that you used the STROBE cross sectional reporting guidelines, and cite them as:

von Elm E, Altman DG, Egger M, Pocock SJ, Gotsche PC, Vandenbroucke JP. The Strengthening the Reporting of Observational Studies in Epidemiology (STROBE) Statement: guidelines for reporting observational studies.

|                           |                     |                                                                                    | Page   |
|---------------------------|---------------------|------------------------------------------------------------------------------------|--------|
|                           |                     | Reporting Item                                                                     | Number |
| <b>Title and abstract</b> |                     |                                                                                    |        |
| Title                     | <a href="#">#1a</a> | Indicate the study's design with a commonly used term in the title or the abstract | 1      |
| Abstract                  | <a href="#">#1b</a> | Provide in the abstract an informative and balanced summary                        | 3      |

of what was done and what was found

## Introduction

|                               |                     |                                                                                                                                                                                                                                                                      |     |
|-------------------------------|---------------------|----------------------------------------------------------------------------------------------------------------------------------------------------------------------------------------------------------------------------------------------------------------------|-----|
| Background /<br>rationale     | <a href="#">#2</a>  | Explain the scientific background and rationale for the investigation being reported                                                                                                                                                                                 | 4   |
| Objectives                    | <a href="#">#3</a>  | State specific objectives, including any prespecified hypotheses                                                                                                                                                                                                     | 6   |
| <b>Methods</b>                |                     |                                                                                                                                                                                                                                                                      |     |
| Study design                  | <a href="#">#4</a>  | Present key elements of study design early in the paper                                                                                                                                                                                                              | 7   |
| Setting                       | <a href="#">#5</a>  | Describe the setting, locations, and relevant dates, including periods of recruitment, exposure, follow-up, and data collection                                                                                                                                      | 7   |
| Eligibility criteria          | <a href="#">#6a</a> | Give the eligibility criteria, and the sources and methods of selection of participants.                                                                                                                                                                             | 7   |
|                               | <a href="#">#7</a>  | Clearly define all outcomes, exposures, predictors, potential confounders, and effect modifiers. Give diagnostic criteria, if applicable                                                                                                                             | 8-9 |
| Data sources /<br>measurement | <a href="#">#8</a>  | For each variable of interest give sources of data and details of methods of assessment (measurement). Describe comparability of assessment methods if there is more than one group. Give information separately for for exposed and unexposed groups if applicable. | 9   |
| Bias                          | <a href="#">#9</a>  | Describe any efforts to address potential sources of bias                                                                                                                                                                                                            | 10  |
| Study size                    | <a href="#">#10</a> | Explain how the study size was arrived at                                                                                                                                                                                                                            | 8   |

|    |                  |                      |                                                                   |      |
|----|------------------|----------------------|-------------------------------------------------------------------|------|
| 1  | Quantitative     | <a href="#">#11</a>  | Explain how quantitative variables were handled in the            | 8-9  |
| 2  |                  |                      |                                                                   |      |
| 3  | variables        |                      | analyses. If applicable, describe which groupings were chosen,    |      |
| 4  |                  |                      |                                                                   |      |
| 5  |                  |                      | and why                                                           |      |
| 6  |                  |                      |                                                                   |      |
| 7  |                  |                      |                                                                   |      |
| 8  |                  |                      |                                                                   |      |
| 9  | Statistical      | <a href="#">#12a</a> | Describe all statistical methods, including those used to control | 9-10 |
| 10 |                  |                      |                                                                   |      |
| 11 | methods          |                      | for confounding                                                   |      |
| 12 |                  |                      |                                                                   |      |
| 13 |                  |                      |                                                                   |      |
| 14 | Statistical      | <a href="#">#12b</a> | Describe any methods used to examine subgroups and                | 10   |
| 15 |                  |                      |                                                                   |      |
| 16 | methods          |                      | interactions                                                      |      |
| 17 |                  |                      |                                                                   |      |
| 18 |                  |                      |                                                                   |      |
| 19 | Statistical      | <a href="#">#12c</a> | Explain how missing data were addressed                           | 10   |
| 20 |                  |                      |                                                                   |      |
| 21 | methods          |                      |                                                                   |      |
| 22 |                  |                      |                                                                   |      |
| 23 |                  |                      |                                                                   |      |
| 24 |                  |                      |                                                                   |      |
| 25 | Statistical      | <a href="#">#12d</a> | If applicable, describe analytical methods taking account of      | 8    |
| 26 |                  |                      |                                                                   |      |
| 27 | methods          |                      | sampling strategy                                                 |      |
| 28 |                  |                      |                                                                   |      |
| 29 |                  |                      |                                                                   |      |
| 30 | Statistical      | <a href="#">#12e</a> | Describe any sensitivity analyses                                 | 10   |
| 31 |                  |                      |                                                                   |      |
| 32 | methods          |                      |                                                                   |      |
| 33 |                  |                      |                                                                   |      |
| 34 |                  |                      |                                                                   |      |
| 35 |                  |                      |                                                                   |      |
| 36 | <b>Results</b>   |                      |                                                                   |      |
| 37 |                  |                      |                                                                   |      |
| 38 |                  |                      |                                                                   |      |
| 39 | Participants     | <a href="#">#13a</a> | Report numbers of individuals at each stage of study—eg           | 7    |
| 40 |                  |                      |                                                                   |      |
| 41 |                  |                      | numbers potentially eligible, examined for eligibility, confirmed |      |
| 42 |                  |                      |                                                                   |      |
| 43 |                  |                      | eligible, included in the study, completing follow-up, and        |      |
| 44 |                  |                      |                                                                   |      |
| 45 |                  |                      | analysed. Give information separately for for exposed and         |      |
| 46 |                  |                      |                                                                   |      |
| 47 |                  |                      | unexposed groups if applicable.                                   |      |
| 48 |                  |                      |                                                                   |      |
| 49 |                  |                      |                                                                   |      |
| 50 |                  |                      |                                                                   |      |
| 51 | Participants     | <a href="#">#13b</a> | Give reasons for non-participation at each stage                  | n/a  |
| 52 |                  |                      |                                                                   |      |
| 53 |                  |                      |                                                                   |      |
| 54 | Participants     | <a href="#">#13c</a> | Consider use of a flow diagram                                    | n/a  |
| 55 |                  |                      |                                                                   |      |
| 56 |                  |                      |                                                                   |      |
| 57 | Descriptive data | <a href="#">#14a</a> | Give characteristics of study participants (eg demographic,       | 11   |
| 58 |                  |                      |                                                                   |      |
| 59 |                  |                      |                                                                   |      |
| 60 |                  |                      |                                                                   |      |

clinical, social) and information on exposures and potential confounders. Give information separately for exposed and unexposed groups if applicable.

|    |                   |                      |                                                                                                                                                                                                          |       |
|----|-------------------|----------------------|----------------------------------------------------------------------------------------------------------------------------------------------------------------------------------------------------------|-------|
| 8  | Descriptive data  | <a href="#">#14b</a> | Indicate number of participants with missing data for each variable of interest                                                                                                                          | 11    |
| 9  |                   |                      |                                                                                                                                                                                                          |       |
| 10 |                   |                      |                                                                                                                                                                                                          |       |
| 11 |                   |                      |                                                                                                                                                                                                          |       |
| 12 |                   |                      |                                                                                                                                                                                                          |       |
| 13 | Outcome data      | <a href="#">#15</a>  | Report numbers of outcome events or summary measures. Give information separately for exposed and unexposed groups if applicable.                                                                        | 11    |
| 14 |                   |                      |                                                                                                                                                                                                          |       |
| 15 |                   |                      |                                                                                                                                                                                                          |       |
| 16 |                   |                      |                                                                                                                                                                                                          |       |
| 17 |                   |                      |                                                                                                                                                                                                          |       |
| 18 |                   |                      |                                                                                                                                                                                                          |       |
| 19 |                   |                      |                                                                                                                                                                                                          |       |
| 20 |                   |                      |                                                                                                                                                                                                          |       |
| 21 | Main results      | <a href="#">#16a</a> | Give unadjusted estimates and, if applicable, confounder-adjusted estimates and their precision (eg, 95% confidence interval). Make clear which confounders were adjusted for and why they were included | 11-12 |
| 22 |                   |                      |                                                                                                                                                                                                          |       |
| 23 |                   |                      |                                                                                                                                                                                                          |       |
| 24 |                   |                      |                                                                                                                                                                                                          |       |
| 25 |                   |                      |                                                                                                                                                                                                          |       |
| 26 |                   |                      |                                                                                                                                                                                                          |       |
| 27 |                   |                      |                                                                                                                                                                                                          |       |
| 28 |                   |                      |                                                                                                                                                                                                          |       |
| 29 |                   |                      |                                                                                                                                                                                                          |       |
| 30 |                   |                      |                                                                                                                                                                                                          |       |
| 31 | Main results      | <a href="#">#16b</a> | Report category boundaries when continuous variables were categorized                                                                                                                                    | 11-12 |
| 32 |                   |                      |                                                                                                                                                                                                          |       |
| 33 |                   |                      |                                                                                                                                                                                                          |       |
| 34 |                   |                      |                                                                                                                                                                                                          |       |
| 35 |                   |                      |                                                                                                                                                                                                          |       |
| 36 | Main results      | <a href="#">#16c</a> | If relevant, consider translating estimates of relative risk into absolute risk for a meaningful time period                                                                                             | 12    |
| 37 |                   |                      |                                                                                                                                                                                                          |       |
| 38 |                   |                      |                                                                                                                                                                                                          |       |
| 39 |                   |                      |                                                                                                                                                                                                          |       |
| 40 |                   |                      |                                                                                                                                                                                                          |       |
| 41 |                   |                      |                                                                                                                                                                                                          |       |
| 42 | Other analyses    | <a href="#">#17</a>  | Report other analyses done—e.g., analyses of subgroups and interactions, and sensitivity analyses                                                                                                        | 12-13 |
| 43 |                   |                      |                                                                                                                                                                                                          |       |
| 44 |                   |                      |                                                                                                                                                                                                          |       |
| 45 |                   |                      |                                                                                                                                                                                                          |       |
| 46 |                   |                      |                                                                                                                                                                                                          |       |
| 47 | <b>Discussion</b> |                      |                                                                                                                                                                                                          |       |
| 48 |                   |                      |                                                                                                                                                                                                          |       |
| 49 |                   |                      |                                                                                                                                                                                                          |       |
| 50 | Key results       | <a href="#">#18</a>  | Summarise key results with reference to study objectives                                                                                                                                                 | 13    |
| 51 |                   |                      |                                                                                                                                                                                                          |       |
| 52 |                   |                      |                                                                                                                                                                                                          |       |
| 53 | Limitations       | <a href="#">#19</a>  | Discuss limitations of the study, taking into account sources of potential bias or imprecision. Discuss both direction and magnitude of any potential bias.                                              | 14-15 |
| 54 |                   |                      |                                                                                                                                                                                                          |       |
| 55 |                   |                      |                                                                                                                                                                                                          |       |
| 56 |                   |                      |                                                                                                                                                                                                          |       |
| 57 |                   |                      |                                                                                                                                                                                                          |       |
| 58 |                   |                      |                                                                                                                                                                                                          |       |
| 59 |                   |                      |                                                                                                                                                                                                          |       |
| 60 |                   |                      |                                                                                                                                                                                                          |       |

|    |                          |                     |                                                                      |       |
|----|--------------------------|---------------------|----------------------------------------------------------------------|-------|
| 1  | Interpretation           | <a href="#">#20</a> | Give a cautious overall interpretation considering objectives,       | 14-15 |
| 2  |                          |                     | limitations, multiplicity of analyses, results from similar studies, |       |
| 3  |                          |                     | and other relevant evidence.                                         |       |
| 4  |                          |                     |                                                                      |       |
| 5  |                          |                     |                                                                      |       |
| 6  |                          |                     |                                                                      |       |
| 7  |                          |                     |                                                                      |       |
| 8  |                          |                     |                                                                      |       |
| 9  | Generalisability         | <a href="#">#21</a> | Discuss the generalisability (external validity) of the study        | 14    |
| 10 |                          |                     | results                                                              |       |
| 11 |                          |                     |                                                                      |       |
| 12 |                          |                     |                                                                      |       |
| 13 |                          |                     |                                                                      |       |
| 14 | <b>Other Information</b> |                     |                                                                      |       |
| 15 |                          |                     |                                                                      |       |
| 16 |                          |                     |                                                                      |       |
| 17 | Funding                  | <a href="#">#22</a> | Give the source of funding and the role of the funders for the       | 16    |
| 18 |                          |                     | present study and, if applicable, for the original study on which    |       |
| 19 |                          |                     | the present article is based                                         |       |
| 20 |                          |                     |                                                                      |       |
| 21 |                          |                     |                                                                      |       |
| 22 |                          |                     |                                                                      |       |
| 23 |                          |                     |                                                                      |       |
| 24 |                          |                     |                                                                      |       |

25 The STROBE checklist is distributed under the terms of the Creative Commons Attribution License  
26 CC-BY. This checklist was completed on 17. September 2021 using <https://www.goodreports.org/>, a  
27 tool made by the [EQUATOR Network](#) in collaboration with [Penelope.ai](#)  
28  
29  
30  
31  
32  
33  
34  
35  
36  
37  
38  
39  
40  
41  
42  
43  
44  
45  
46  
47  
48  
49  
50  
51  
52  
53  
54  
55  
56  
57  
58  
59  
60



# BMJ Open

## Pathways linking early life factors and frailty among middle-aged and older adults in England: Findings from the UK Biobank

|                                 |                                                                                                                                                                                                                                                                                                                                                                                                                                                                                                                                                                                                                                                                                                           |
|---------------------------------|-----------------------------------------------------------------------------------------------------------------------------------------------------------------------------------------------------------------------------------------------------------------------------------------------------------------------------------------------------------------------------------------------------------------------------------------------------------------------------------------------------------------------------------------------------------------------------------------------------------------------------------------------------------------------------------------------------------|
| Journal:                        | <i>BMJ Open</i>                                                                                                                                                                                                                                                                                                                                                                                                                                                                                                                                                                                                                                                                                           |
| Manuscript ID                   | bmjopen-2021-057511.R1                                                                                                                                                                                                                                                                                                                                                                                                                                                                                                                                                                                                                                                                                    |
| Article Type:                   | Original research                                                                                                                                                                                                                                                                                                                                                                                                                                                                                                                                                                                                                                                                                         |
| Date Submitted by the Author:   | 25-Jun-2022                                                                                                                                                                                                                                                                                                                                                                                                                                                                                                                                                                                                                                                                                               |
| Complete List of Authors:       | Maharani, Asri; The University of Manchester, Social Work<br>Didikoglu, Altug; The University of Manchester, Division of Neuroscience & Experimental Psychology<br>O'Neill, Terence; University of Manchester, Centre for Epidemiology Versus Arthritis, Division of Musculoskeletal & Dermatological Sciences; Manchester University NHS Foundation Trust, UK & NIHR Biomedical Research Centre<br>Pendleton, Neil; The University of Manchester, Division of Neuroscience & Experimental Psychology<br>Canal, Maria; The University of Manchester, Division of Neuroscience & Experimental Psychology<br>Payton, Antony; The University of Manchester, Division of Informatics, Imaging & Data Sciences |
| <b>Primary Subject Heading</b>: | Geriatric medicine                                                                                                                                                                                                                                                                                                                                                                                                                                                                                                                                                                                                                                                                                        |
| Secondary Subject Heading:      | Epidemiology, Public health                                                                                                                                                                                                                                                                                                                                                                                                                                                                                                                                                                                                                                                                               |
| Keywords:                       | EPIDEMIOLOGY, GERIATRIC MEDICINE, SOCIAL MEDICINE                                                                                                                                                                                                                                                                                                                                                                                                                                                                                                                                                                                                                                                         |
|                                 |                                                                                                                                                                                                                                                                                                                                                                                                                                                                                                                                                                                                                                                                                                           |

SCHOLARONE™  
Manuscripts

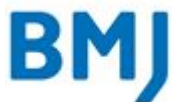

I, the Submitting Author has the right to grant and does grant on behalf of all authors of the Work (as defined in the below author licence), an exclusive licence and/or a non-exclusive licence for contributions from authors who are: i) UK Crown employees; ii) where BMJ has agreed a CC-BY licence shall apply, and/or iii) in accordance with the terms applicable for US Federal Government officers or employees acting as part of their official duties; on a worldwide, perpetual, irrevocable, royalty-free basis to BMJ Publishing Group Ltd ("BMJ") its licensees and where the relevant Journal is co-owned by BMJ to the co-owners of the Journal, to publish the Work in this journal and any other BMJ products and to exploit all rights, as set out in our [licence](#).

The Submitting Author accepts and understands that any supply made under these terms is made by BMJ to the Submitting Author unless you are acting as an employee on behalf of your employer or a postgraduate student of an affiliated institution which is paying any applicable article publishing charge ("APC") for Open Access articles. Where the Submitting Author wishes to make the Work available on an Open Access basis (and intends to pay the relevant APC), the terms of reuse of such Open Access shall be governed by a Creative Commons licence – details of these licences and which [Creative Commons](#) licence will apply to this Work are set out in our licence referred to above.

Other than as permitted in any relevant BMJ Author's Self Archiving Policies, I confirm this Work has not been accepted for publication elsewhere, is not being considered for publication elsewhere and does not duplicate material already published. I confirm all authors consent to publication of this Work and authorise the granting of this licence.

**Title Page****Title:**

Pathways linking early life factors and frailty among middle-aged and older adults in England:

Findings from the UK Biobank

**Running Title:**

Early-life factors and frailty

**Keywords:**

UK Biobank, Early-life factors, frailty

**Authors and author affiliations:**

Asri Maharani, MD, PhD<sup>1\*</sup>, Altug Didikoglu, PhD<sup>2\*</sup>, Terence W O'Neill, MD, PhD<sup>3</sup>, Neil Pendleton, MD, PhD<sup>2</sup>, Maria Mercè Canal, PhD<sup>2</sup>, Antony Payton, PhD<sup>4</sup>

1) Division of Nursing, Midwifery, and Social Work, The University of Manchester, UK

2) Division of Neuroscience & Experimental Psychology, The University of Manchester, UK

3) Centre for Epidemiology Versus Arthritis, Division of Musculoskeletal & Dermatological Sciences, The University of Manchester, UK & NIHR Biomedical Research Centre, Manchester University NHS Foundation Trust, Manchester.

4) Division of Informatics, Imaging & Data Sciences, The University of Manchester, UK

\* These authors contributed equally to this work

**Corresponding author's full address and corresponding author's current email:**

**Name:** Altug Didikoglu

**Address:** Division of Neuroscience & Experimental Psychology, The University of Manchester, AV Hill Building, Oxford Road, M13 9PL, Manchester, UK

**Email:** altug.didikoglu@manchester.ac.uk

**Acknowledgements**

1  
2  
3 Altug Didikoglu was supported by a grant from the Republic of Turkey Ministry of National  
4 Education. This research has been conducted using the UK Biobank Resource under  
5  
6 Application Number 41877.  
7  
8

9  
10 **Conflicts of interest**

11  
12 All authors declare no conflicts of interest.  
13

14  
15 **Main text word counts:** 3482

16  
17 **Number of data elements:** 4  
18  
19  
20  
21  
22  
23  
24  
25  
26  
27  
28  
29  
30  
31  
32  
33  
34  
35  
36  
37  
38  
39  
40  
41  
42  
43  
44  
45  
46  
47  
48  
49  
50  
51  
52  
53  
54  
55  
56  
57  
58  
59  
60

For peer review only

## Abstract

**Objectives** Exposures in utero and during infancy may impact the development of diseases later in life. They may be linked with development of frailty though the mechanism is unclear. This study aims to determine the associations between early life risk factors and development of frailty amongst middle-aged and older adults as well as potential pathways via education, for any observed association.

**Design** A cross-sectional study.

**Settings** This study used data from UK Biobank, a large population-based cohort.

**Participants** 502,489 individuals aged 37-73 years were included in the analysis.

**Primary and secondary outcome measures** Early life factors in this study included being breastfed as a baby, maternal smoking, birth weight, the presence of perinatal diseases, birth month, and birth place (in or outside the UK). We developed a frailty index comprising 49 deficits. We used generalised structural equation modelling to examine the associations between early life factors and development of frailty and whether any observed association was mediated via educational attainment.

**Results** A history of breastfeeding and higher birth weight were associated with a lower frailty index while maternal smoking, the occurrence of perinatal diseases and birth month with a longer day length were associated with a higher frailty index. Educational level mediated the relationship between these early life factors and frailty index.

**Conclusions** This study highlights that biological and social risk occurring at different stages of life are related to the variations in frailty index in later life and suggests opportunities for prevention across the life course.

**Keywords** early life factors, frailty, generalised structural equation model, UK Biobank

## Article Summary

### Strengths and limitations of this study

- Using a large cohort of British adults in middle and older age, this study was sufficiently powered to identify associations between early life factors and frailty index.
- The findings provide the first evidence that education mediates the association between early life factors and frailty index.
- As the cohort is not nationally representative, the findings cannot be generalised to the general population.
- The questionnaire on early life factors was based on self-report and is therefore subject to recall error.

## Introduction

As the world's population ages, a major goal is the attainment of increased life expectancy accompanied by fewer years spent in poor health and with disability and dependency. The worldwide population of older people (65 years and above) is predicted to double from 0.7 billion (9%) in 2019 to 1.5 billion (16%) in 2050 [1]. In addition, there is evidence that the number of disability adjusted life years (DALY) among those aged 60 years and older is increasing (from 434 million in 1990 to 574 million in 2010) [2], which will increase demand for health and care services. As physical disability is an adverse outcome of frailty [3], more research in geriatrics and gerontology has focused on defining and recognising frailty among older people with the aim of determining preventive and interventional measures [4].

Frailty can be defined as a state of increased vulnerability resulting from an age-related decline in physiologic and cognitive reserves and function following stressor events [5]. The frailty index approach, developed by Rockwood et al. [6], measures frailty level as the number of deficits presents over the number of deficits considered, including symptoms, diagnoses, disabilities, and functional impairments. Frailty has become more common with the ageing of the population. A systematic review including 240 studies from 62 countries showed that 24% of people aged 50 years and older are frail as calculated using the frailty index approach [7].

Frailty has been found to be associated with adverse health outcomes including loss of mobility, disability, falls, hospitalisation, need for long-term care, and death [8-10].

Understanding the factors that are associated with frailty is thus important for developing interventions to prevent frailty and for providing directions for future public health policies.

A growing body of literature acknowledges that the first two decades of human life are critical in determining adult life trajectories. Among the early life factors, body size at birth [11-12], cigarette smoke exposure in utero [13], infants exclusively breastfed [14], birth month [15], and the presence of perinatal diseases [16] have been found to be associated with adult chronic

1  
2  
3 diseases. However, the study linking those factors and frailty is limited. In addition, the  
4  
5 evidence on the link between early life factors and occurrence of frailty have been mixed  
6  
7 [17,18]. The present study thus aims to determine the associations between early life factors,  
8  
9 including a history of being breastfed, maternal smoking, birth weight, the presence of  
10  
11 perinatal diseases, birth in or outside of the UK or outside the UK and birth month, and frailty  
12  
13 in UK adults.  
14  
15

16  
17 Furthermore, this study contributes to the literature investigating the determinants of health  
18  
19 in later life by exploring the pathways of early life factors that have a lasting impact on health  
20  
21 in middle and old age. The pathway hypothesis posits that early life conditions are important  
22  
23 not only because they are directly associated with late life but also because they shape later  
24  
25 life experiences [19,20], including restricted educational attainment and life chances. The  
26  
27 most frequently hypothesised pathway between circumstances in early stages of life and adult  
28  
29 health is adult socioeconomic status. Pakpahan et al. showed that socioeconomic factors in  
30  
31 adulthood, including education, mediate the link between childhood health and  
32  
33 socioeconomic conditions and self-rated health among older Europeans [19]. Because  
34  
35 interventions that target common pathways have the potential to reduce frailty, the  
36  
37 identification of the pathways of early life factors leading to frailty later in life has substantial  
38  
39 public health relevance for the translation of life course epidemiology into practice. The  
40  
41 present study considers whether any observed association between early life factors and frailty  
42  
43 could be attributed to differences in education attainment (Figure 1).  
44  
45  
46  
47  
48

## 49 **Methods**

### 50 **Source and Sample**

51  
52 Data were drawn from the UK Biobank, a prospective cohort study of the genetic,  
53  
54 environmental and lifestyle causes of diseases among adults in the UK [21]. The study  
55  
56 involved the collection of extensive questionnaire data and biological samples from, and the  
57  
58  
59  
60



1  
2  
3 performance of, physical examinations of more than 500,000 respondents enrolled at 22  
4 assessment sites in England, Scotland, and Wales between 2006 and 2010. Subjects who took  
5 part provided written informed consent for data collection, analysis and linkage; they also  
6 completed a touchscreen questionnaire, a nurse-led interview, and had their physical  
7 measurements taken. The UK Biobank invited adults who were registered with a general  
8 practitioner and who lived within reasonable traveling distance of the assessment centre. The  
9 current study includes 502,489 individuals aged 37-73 years who had study-specific available  
10 data and were not withdrawn from the study. This study was conducted as part of UK Biobank  
11 Project Number 41877 and is covered by the generic ethics approval for UK Biobank studies  
12 from the NHS National Research Ethics Service (16/NW/0274).

## 26 **Measures**

### 28 *Early life factors*

30 Information by questionnaire was obtained on: maternal smoking in the pre- and post-natal  
31 period, history of being breastfed as a baby, birth month, birthweight, the presence of perinatal  
32 diseases, and place of birth. We defined maternal smoking based on the question ‘Did your  
33 mother smoke regularly around the time when you were born?’ (Data-Field 1787).  
34 Respondents were categorised as having been breastfed as babies if they answered ‘yes’ to  
35 the question: ‘Were you breastfed when you were a baby?’ (Data-Field 1677). We retrieved  
36 information on birth month from the birth date (Data-Field 52) and treated it as the cosine of  
37 the values, representing the rhythmic seasonal length of day and night. We considered this  
38 might represent daylight time better than treating it as a categorical variable. This is an  
39 approach which we have used in a previous study [22]. Birth months of participants born in  
40 the UK and other countries in the southern hemisphere were converted to their antiphase.  
41 Information on birthweight was gathered by means of self-reported birthweight in kilograms  
42 (Data-Field 20022). We categorised the birth weight into low birth weight (<2,500 g), normal  
43  
44  
45  
46  
47  
48  
49  
50  
51  
52  
53  
54  
55  
56  
57  
58  
59  
60

1  
2  
3 birth weight (2,500 – 4,000), and high birth weight (>4,000 gr). The presence of perinatal  
4 diseases ('ICD10 Chapter XVI: Certain conditions originating in the perinatal period') was  
5 coded as one based on self-reported medical history (Category 2416). We categorised the  
6 place birth of the respondents as born in the UK or outside the UK (Data-Field 1647). Answers  
7 of 'Do not know' or 'Prefer not to answer' were accepted as missing for all questions.  
8  
9

### 10 11 12 13 14 *Education*

15  
16 The education variable represents the highest educational level completed by the respondents.  
17 Qualifications were categorised as high school or less (reference) and college or university  
18 degree (Data-Field 6138).  
19  
20  
21  
22

### 23 24 *Frailty index*

25  
26 Following William et al. [23], we derived the frailty index using 49 functional, psychological,  
27 and social deficits within the range of data variables in the UK Biobank (see Supplementary  
28 Table 1). We coded the binary variables as 0 or 1, and for ordinal and continuous variables,  
29 coding was based on distribution. The total number of deficits was summed and divided by  
30 total possible deficits to create a frailty index between 0 and 1, where higher scores indicated  
31 greater frailty.  
32  
33  
34  
35  
36  
37  
38

### 39 40 *Covariates*

41  
42 We included demographic and health behaviour as covariates. Demographic information  
43 included age (in years; Data-Field 21003), gender (with male as the reference; Data-Field 31),  
44 and ethnicity (other than Caucasian as the reference or Caucasian; Data-Field 21000). Health  
45 behaviours included physical activity, alcohol intake and smoking status. Physical activity  
46 was measured as the number of days per week respondents engaged in at least 10 minutes of  
47 moderate or vigorous physical activity (Data-Field 884, Data-Field 904). Respondents were  
48 classified as non-current smokers (reference) or current smokers (Data-Field 20116). Alcohol  
49  
50  
51  
52  
53  
54  
55  
56  
57  
58  
59  
60

1  
2  
3 intake status was classified as non-current (reference) or current alcohol drinking (Data-Field  
4  
5 20117).  
6

### 7 8 **Statistical Analyses** 9

10 Descriptive statistics were used to summarise subject characteristics including means and  
11  
12 standard deviation for continuous variables and frequencies and percentages for categorical  
13  
14 variables. We looked at the associations between frailty index and both early life factors and  
15  
16 other covariates using unpaired t-tests (dichotomous variables), ANOVA (categorical  
17  
18 variables), and Pearson's correlation (continuous variables).  
19

20  
21 We first performed a multivariate regression model including early life factors, education, and  
22  
23 covariates (age, gender, ethnicity, smoking, alcohol drinking, physical activity). We further  
24  
25 handled missing data using multivariate imputation by chained equations (MICE) [24] (using  
26  
27 Stata's mi program) [25]. Twenty imputations were used.  
28  
29

30 The structural equation model (SEM) has been widely used to investigate complex  
31  
32 relationships between variables in epidemiological studies [26]. SEM can be used to resolve  
33  
34 the endogeneity problem between variables and to explore direct, indirect, and total effects  
35  
36 between exogenous and endogenous variables. It can jointly test a variety of hypotheses that  
37  
38 involve different types of complicated cause-effect relationships. However, all responses are  
39  
40 assumed to be continuous, even when a variable is binary or categorical. In our analysis we  
41  
42 include binary (education). To address this, we used a generalised structural equation model  
43  
44 (GSEM) to identify the link between early life factors and frailty index and the mediating  
45  
46 effect of education and income on that relationship. A GSEM combines generalised linear  
47  
48 model (GLM) estimation and SEM modelling estimation; it can accommodate binary, ordinal,  
49  
50 counted and categorical data [27]. Using maximum likelihood estimators, GLM estimators  
51  
52 are based on a density function, allowing the direct use of all types of data [28]. The analyses  
53  
54 were performed using MPlus version 8. We examined education as mediators of the  
55  
56  
57  
58  
59  
60

1  
2  
3 relationship in the GSEM model, which were controlled for age, gender, ethnicity and health  
4 behaviours (Model fit information: Chi-square=5049.35, p value=0.00; RMSEA=0.06,  
5  
6 CFI=0.82; WRMR=13.01).  
7  
8

### 9 10 **Patient and public involvement**

11  
12 Patients and/or the public were not involved in this study.  
13

### 14 15 **Results**

#### 16 17 *Subjects*

18  
19 The study sample consisted of 502,489 respondents with an average age of 56.53 years  
20 (standard deviation [SD]=8.10 years) (Table 1). Just under half (45%) of the respondents were  
21 male, and most were Caucasian (94.59%). Around one-third of the respondents had graduated  
22 from college or university. The proportion of respondents whose mothers smoked regularly  
23 around the time of their birth was 29%. More than 72% of respondents were breastfed as  
24 babies, and 0.18% had perinatal diseases. 10% of respondents had low birth weight, while  
25 13% of them had high birth weight. 91% of the respondents were born in the UK. Just over  
26 two-thirds of subjects reported engaging in at least 10 minutes of moderate or vigorous  
27 physical activity at least three days per week; 92% consumed alcohol and 11% were current  
28 smokers.  
29  
30  
31  
32  
33  
34  
35  
36  
37  
38  
39  
40  
41

#### 42 43 *Early life factors, covariates and frailty index*

44  
45 In bivariate analyses, compared to those whose mothers did not smoke around birth, maternal  
46 pre- and post-natal smoking was associated with a significantly higher frailty index (0.146 vs  
47 0.133) as was the presence of perinatal diseases (0.149 vs 0.138) and being born in the UK  
48 (0.138 vs 0.137). A history of breast feeding was associated with a lower frailty index (0.134  
49 vs 0.137). Low (0.149 vs 0.131) and high (0.136 vs 0.138) birthweight were associated with  
50 higher frailty scores compared to normal birthweight. Shorter daylight hours at birth ( $r=-0.01$ )  
51 were associated with lower frailty indices. As expected, the frailty index was higher among  
52  
53  
54  
55  
56  
57  
58  
59  
60

1  
2  
3 women than among men and in those with lower educational attainment. The frailty index  
4  
5 was also higher in smokers, non-drinkers and those who engaged in less physical activity.  
6

7  
8 In regression analyses the effects of early life factors and covariates on the frailty index  
9  
10 appeared similar in terms of both magnitude and direction when using both non-imputed and  
11  
12 imputed data (see Supplementary Table 2). In these multivariate regression analyses adjusting  
13  
14 for age, gender and health behaviours, birth month with longer hours of daylight, having a  
15  
16 low and high birthweight, maternal smoking, being breastfed as baby, perinatal diseases and  
17  
18 born in the UK had positive and significant associations with frailty index.  
19

### 20 21 *Mediation analysis*

22  
23 In the GSEM model, education mediated the association between early life factors and frailty  
24  
25 index among middle-aged and older adults, supporting the pathway hypothesis. Table 2  
26  
27 presents the total, direct and indirect effects for each of the early life factor on the frailty  
28  
29 index. Maternal smoking (direct effect: coef.=0.068, z=33.40; indirect effect: coef.=0.011,  
30  
31 z=25.54) and low (direct effect: coef.=0.041, z=20.93; indirect effect: coef.=0.003, z=9.18)  
32  
33 and high birthweight (direct effect: coef.=0.013, z=6.34; indirect effect: coef.=0.001, z=4.09)  
34  
35 were directly and indirectly affecting frailty index compared to normal birthweight. The direct  
36  
37 and indirect effects of breastfed as a baby on lower frailty index were -0.022 (z=-10.36) and  
38  
39 -0.009 (z=-22.91). Perinatal diseases had significant direct effect on higher frailty index  
40  
41 (coef.=0.007, z=3.83), but it had no indirect effect on the frailty index (coef.=0.000, z=0.27).  
42  
43 Born in the UK, differently, had significant indirect effect on higher frailty index  
44  
45 (coef.=0.016, z=31.24), but it had no direct effect on the frailty index (coef.=0.002, z=0.74).  
46  
47 Birth months with short daylight was affecting lower frailty scores with the lowest effect size  
48  
49 both directly (coef.=-0.006, z=-2.91) and indirectly (coef.=-0.001, p-value=-2.35).  
50  
51 Education mediated the links between early life factors and frailty index (Figure 2).  
52  
53 Participants born in the UK had a lower probability of completing higher education (coef.=  
54  
55  
56  
57  
58  
59  
60

0.130,  $z=-44.65$ ). Having been breastfed as a baby (coef.=0.076,  $z=26.87$ ) were associated with higher educational attainment, while maternal smoking was associated with lower educational attainment (coef.=-0.087,  $z=-31.41$ ). Had low (coef.=-0.027,  $z=-9.39$ ) and high birthweight (coef.=-0.011,  $z=-4.11$ ) was related to lower education attainment compared to normal birthweight. Birth months with short daylight was related to higher education with the lowest effect size (coef.=0.006,  $z=2.35$ ). Higher education was also associated with a lower frailty index (coef.=-0.123,  $z=-44.30$ ). Amongst covariates with greater effect sizes, older age (coef.=0.178,  $z=83.25$ ), lower activity levels (coef.=-0.088,  $z=-45.61$ ) and smoking (coef.=0.106,  $z=56.36$ ) were associated with a higher frailty index. Drinking alcohol is related to lower frailty index (coef.=-0.093;  $z=-51.63$ ).

## Discussions

Using data from UK Biobank we found that a history of breastfeeding was associated with a lower frailty index, while maternal smoking, having low or high birth weight, perinatal diseases and birth month with longer day length were associated with a higher frailty index. This study provides the first evidence that educational attainment level mediates the association between early life factors and frailty index.

Early life factors have previously been linked with higher frailty and chronic disease risk later in life [29,30]. Our findings highlight the importance of early life factors in determining frailty in middle age and older individuals. Maternal smoking was directly associated with higher frailty compared to those who were not exposed to maternal smoking. Evidence has suggested that cigarette smoke exposure in utero is linked to the development of chronic diseases later in life, including type 2 diabetes, obesity, certain cancers and respiratory disorders [13]. We also showed that this association was mediated by educational attainment. This is in line with a previous study which reported lower academic achievements of adolescents whose mothers

1  
2  
3 smoked during pregnancy [31]. Maternal smoking during pregnancy was also found to be  
4 correlated with the children's cognitive function [32].  
5  
6

7  
8 There is some evidence of a link between early life factors and occurrence of frailty. In a  
9  
10 recent study in Finland, greater weight, length and BMI at birth were associated with a lower  
11 risk of frailty later in life [17]. Having low or high birth weight were associated with higher  
12 frailty index compared to had normal birthweight, both directly and indirectly through  
13 education. Bleker and colleagues found that prenatal undernutrition was not associated with  
14 frailty but was associated with poorer health in old age, including slower gait speed and lower  
15 physical functioning and the findings remained significant after inclusion of an extensive set  
16 of control variables including adult socioeconomic status [18]. Low birth weight is associated  
17 with increased risk of age-related diseases in prior review, and insulin-like growth factor  
18 (IGF-1) is the key driver of this process [33]. High birth weight may be the results of maternal  
19 obesity,<sup>34</sup> and a study in Finland found that being born large for gestational age at term was  
20 associated with thicker carotid intima medial as the marker of subclinical atherosclerosis [35].  
21 We also found that individuals who reported that they were breastfed have lower frailty score.  
22 Infants exclusively breastfed have been found to have a lower risk of obesity, type 2 diabetes  
23 and high blood pressure in adulthood [14].  
24  
25  
26  
27  
28  
29  
30  
31  
32  
33  
34  
35  
36  
37  
38  
39  
40  
41

42 Birth months is associated with lower frailty index with a limited effect sizes in our study. In a  
43 large study in the US with 1,749,400 individuals showed that spring summer-born individual  
44 have relatively higher risk than autumn-winter born individuals and these seasons coincide  
45 with lower life expectancy [36]. This study showed that not only cardiovascular diseases but  
46 also several chronic diseases were found associated with season of birth with having a  
47 different seasonal pattern. The underlying mechanisms may differ for each of these  
48 associations such as sensitization to allergens or vitamin D deficiency [36]. Another possible  
49 mechanism is that differential light exposure during perinatal period influences development  
50  
51  
52  
53  
54  
55  
56  
57  
58  
59  
60

1  
2  
3 of the biological clock, in turn influencing later-life circadian rhythms and sleep system which  
4 are essential for health [37]. In European countries, it was shown that spring/summer born  
5 participants compared to autumn had higher frailty score but this effect seemed independent  
6 of education [38]. However, we found an indirect effect of season of birth through education.  
7  
8 the indirect relationship of season of birth and frailty may be due to social factors such as  
9  
10 September date cut-off to determine age when they start education, which is in line with our  
11 findings showing an association between winter-born individuals and higher education  
12 [39,40].

13  
14  
15 Our results further suggest that having a perinatal disease was associated directly with higher  
16 frailty index. New-borns' perinatal complications are related to accelerated ageing at midlife  
17 [16]. Being born in the UK only affecting the frailty index indirectly through education, but  
18 not directly. Respondents who were not born in the UK were likely to have higher education  
19 attainment, which in turn able to better maintain their health during in later stage of their lives.  
20  
21 However, we should note that our sample in this analysis may not be the representation  
22 of general population and that participants were categorised as being born outside UK without  
23 taking into account the country of origin and their background. In our analysis we observed  
24 that education levels mediate the link between the other early life factors and the frailty index.  
25  
26 Early life factors have a significant relationship with educational attainment, and higher  
27 education attainment is linked to lower frailty index. This result is broadly in keeping with a  
28 prior study in Sweden which found that the associations between childhood conditions and  
29 various old age health indicators (musculoskeletal disorders, cardiovascular disease, self-  
30 rated health and impaired mobility) are mediated by education [41]. Prior research on the  
31 biological and psychological pathways linked childhood health and socioeconomic conditions  
32 to self-reported health status among older adults in 15 European countries [19]. Early life  
33 health is marked by developmental plasticity; life-course trajectories of socioeconomic



1  
2  
3 attainment could be altered by physical and social conditions [42] and set cascading  
4 physiological processes in motion, impacting health decades later [43]. Our findings have  
5 potential implications for policies aiming at preventing frailty among older adults. Subsequent  
6 circumstances mediate the impact of early life factors on frailty later in life, and our study  
7 suggests that interventions such as improving education in midlife may mitigate early life  
8 disadvantages.

9  
10 Our findings are based on a large and well characterised cohort. There are, however, a number  
11 of limitations to be consider in interpreting the results. First, information concerning early life  
12 factors in this study was based on self-report and is therefore subject to recall error. The likely  
13 effect of such error would be to underestimate the relationship between these factors and the  
14 frailty index. Second, we have limited access to the health conditions of the parents. A broad  
15 range of conditions which are comprised in the frailty index bear a hereditary risk, thus taking  
16 into account the health conditions of the parents is important in assessing the independent  
17 associations with frailty. Future studies may include the health conditions of the parents as  
18 the covariates. Third, the information on breast feeding duration is unavailable. Breast feeding  
19 for weeks rather than months may confer different outcomes. A dose response relationship is  
20 thus cannot be assessed. Finally, the data were based on a sample of predominantly Caucasian  
21 men and women and should be extrapolated beyond this group with caution [44].

22  
23 In conclusion, this study indicates an association between early life factors and frailty later in  
24 life. Early life conditions are important as the start of a mediated, incremental process during  
25 the life course. A comprehensive understanding of the determinants of frailty among middle-  
26 aged and older adults requires attention to exposures throughout the entire life course, with a  
27 special focus on the in utero and infancy stages and the chains of associated socioeconomic  
28 conditions that that connect over the life course. Applying a life course perspective to health  
29 in adulthood and old age should have implications for public health interventions, social  
30

1  
2  
3 policy, and further research. Early life is not the only period for any potential successful  
4  
5 intervention; as our findings show, early life disadvantages may be offset by education and  
6  
7 material wealth. Interventions throughout the life course, and especially during early life,  
8  
9 could substantially reduce the health burden later in life.  
10  
11  
12  
13  
14  
15  
16  
17  
18  
19  
20  
21  
22  
23  
24  
25  
26  
27  
28  
29  
30  
31  
32  
33  
34  
35  
36  
37  
38  
39  
40  
41  
42  
43  
44  
45  
46  
47  
48  
49  
50  
51  
52  
53  
54  
55  
56  
57  
58  
59  
60

For peer review only

### **Contributorship statement**

A.D and A.M performed the data analysis. A.D and A.M drafted the manuscript. N.P, T.W.O, M.M.C., A.P. and were involved in planning and supervised the work. All authors discussed the results and commented on the manuscript.

### **Competing interest**

All authors declare no conflicts of interest.

### **Funding**

Altug Didikoglu was supported by a grant from the Republic of Turkey Ministry of National Education. This research has been conducted using the UK Biobank Resource under Application Number 41877.

### **Data sharing statement**

Data are available in a public, open access repository. Other researchers can apply for UK Biobank data to answer specific research questions.

## References

1. United Nations. World Population Prospects 2019: Highlights. New York: Department of Economic and Social Affairs; 2019. Contract No.: (ST/ESA/SER.A/423).
2. Prince MJ, Wu F, Guo Y, et al. The burden of disease in older people and implications for health policy and practice. *Lancet*. 2015;385:549-562.
3. Sternberg SA, Schwartz AW, Karunananthan S, Bergman H, Clarfield MA. The identification of frailty: a systematic literature review. *J Am Geriatr Soc*. 2011;59:2129-2138.
4. Daniels R, van Rossum E, de Witte L, Kempen GI, van den Heuvel W. Interventions to prevent disability in frail community-dwelling elderly: a systematic review. *BMC Health Serv Res*. 2008;8:278.
5. Hogan DB. Models, definitions, and criteria for frailty. *Conn's Handbook of Models for Human Aging*. 2018:35-44.
6. Rockwood K, Mitnitski A. Frailty defined by deficit accumulation and geriatric medicine defined by frailty. *Clin Geriatr Med*. 2011;27:17-26.
7. O'Caoimh R, Sezgin D, O'Donovan MR, et al. Prevalence of frailty in 62 countries across the world: a systematic review and meta-analysis of population-level studies. *Age and Ageing*. 2021;50:96-104.
8. Hanlon P, Nicholl BI, Jani BD, Lee D, McQueenie R, Mair FS. Frailty and prefrailty in middle-aged and older adults and its association with multimorbidity and mortality: a prospective analysis of 493 737 UK Biobank participants. *Lancet Public Health*. 2018;3:e323-e332.
9. Cegri F, Orfila F, Abellana RM, Pastor-Valero M. The Impact of Frailty on Admission to Home Care Services And Nursing Homes: Eight-Year Follow-Up of A Community-Dwelling, Older Adult, Spanish Cohort. *BMC Geriatrics*. 2020;20:1-13.
10. Ensrud KE, Ewing SK, Taylor BC, et al. Frailty and risk of falls, fracture, and mortality in older women: the study of osteoporotic fractures. *J Gerontol A Biol Sci Med Sci*. 2007;62:744-51.
11. Barker DJ. Fetal origins of coronary heart disease. *BMJ*. 1995;311:171-4.
12. Eriksson JG. Developmental origins of health and disease—from a small body size at birth to epigenetics. *Ann Med*. 2016;48:456-467.

13. Doherty S, Grabowski J, Hoffman C, Ng S, Zelikoff J. Early life insult from cigarette smoke may be predictive of chronic diseases later in life. *Biomarkers*. 2009;14(sup1):97-101.
14. Horta BL, Loret de Mola C, Victora CG. Long-term consequences of breastfeeding on cholesterol, obesity, systolic blood pressure and type 2 diabetes: a systematic review and meta-analysis. *Acta Paediatr*. 2015;104:30-7.
15. Zhang Y, Devore EE, Strohmaier S, Grodstein F, Schernhammer ES. Birth month, birth season, and overall and cardiovascular disease mortality in US women: prospective cohort study. *BMJ*. 2019;367.
16. Shalev I, Caspi A, Ambler A, et al. Perinatal complications and aging indicators by midlife. *Pediatrics*. 2014;134:e1315-e23.
17. Haapanen M, Perälä M, Salonen M, et al. Early life determinants of frailty in old age: the Helsinki Birth Cohort Study. *Age and Ageing*. 2018;47:569-75.
18. Bleker LS, de Rooij SR, Painter RC, van der Velde N, Roseboom TJ. Prenatal undernutrition and physical function and frailty at the age of 68 years: the Dutch Famine Birth Cohort Study. *J Gerontol A Biol Sci Med Sci*. 2016;71:1306-14.
19. Pakpahan E, Hoffmann R, Kröger H. The long arm of childhood circumstances on health in old age: Evidence from SHARELIFE. *Advances in Life Course Research*. 2017;31:1-10.
20. Power C, Hertzman C. Social and biological pathways linking early life and adult disease. *Br Med Bull*. 1997;53(1):210-21.
21. Sudlow C, Gallacher J, Allen N, Beral V, Burton P, Danesh J, et al. UK biobank: an open access resource for identifying the causes of a wide range of complex diseases of middle and old age. *PLoS Medicine*. 2015;12(3):e1001779.
22. Didikoglu A, Maharani A, Pendleton N, Canal MM, Payton A. Early life factors and COVID-19 infection in England: A prospective analysis of UK Biobank participants. *Early Human Development*. 2021;155:105326.
23. Williams DM, Jylhävä J, Pedersen NL, Hägg S. A frailty index for UK Biobank participants. *J Gerontol A Biol Sci Med Sci*. 2019;74(4):582-7.
24. Azur MJ, Stuart EA, Frangakis C, Leaf PJ. Multiple imputation by chained equations: what is it and how does it work? *International Journal of Methods in Psychiatric Research*. 2011;20(1):40-9.
25. StataCorp. Stata Multiple-Imputation Reference Manual Release 17. College Station, TX: StataCorp LLC; 2021.

- 1  
2  
3 26. Amorim LDAF, Fiaccone RL, Santos CAS, Santos TNd, de Moraes LTL, Oliveira  
4 NF, et al. Structural Equation Modeling in Epidemiology. *Cad Saúde Pública*.  
5 2010;26(12):2251-62.  
6  
7
- 8 27. Zhang L, Zhang J. Perception of small tourism enterprises in Lao PDR regarding  
9 social sustainability under the influence of social network. *Tourism Management*.  
10 2018;69:109-20.  
11  
12
- 13 28. McCullagh P, Nelder JA. *Generalized Linear Models*: Routledge; 2019.
- 14 29. Michels KB. Early life predictors of chronic disease. *J Womens Health*.  
15 2003;12(2):157-61.  
16  
17
- 18 30. Li Y, Xue Q-L, Odden MC, Chen X, Wu C. Linking early life risk factors to frailty  
19 in old age: evidence from the China Health and Retirement Longitudinal Study. *Age*  
20 *and Ageing*. 2020;49(2):208-17.  
21  
22
- 23 31. Kristjansson AL, Thomas S, Lilly CL, Thorisdottir IE, Allegrante JP, Sigfusdottir  
24 ID. Maternal smoking during pregnancy and academic achievement of offspring  
25 over time: a registry data-based cohort study. *Preventive Medicine*. 2018;113:74-9.  
26  
27
- 28 32. Julvez J, Ribas-Fitó N, Torrent M, Fornes M, Garcia-Esteban R, Sunyer J. Maternal  
29 smoking habits and cognitive development of children at age 4 years in a population-  
30 based birth cohort. *International Journal of Epidemiology*. 2007;36(4):825-32.  
31  
32
- 33 33. Vaiserman AM. Birth weight predicts aging trajectory: A hypothesis. *Mechanisms of*  
34 *Ageing and Development*. 2018;173:61-70.  
35  
36
- 37 34. Hanson M, Cooper C, Aihie Sayer A, Eendebak R, Clough G, Beard J.  
38 Developmental aspects of a life course approach to healthy ageing. *The Journal of*  
39 *Physiology*. 2016;594(8):2147-60.  
40  
41
- 42 35. Skilton MR, Viikari JS, Juonala M, Laitinen T, Lehtimäki T, Taittonen L, et al. Fetal  
43 growth and preterm birth influence cardiovascular risk factors and arterial health in  
44 young adults: the Cardiovascular Risk in Young Finns Study. *Arteriosclerosis,*  
45 *Thrombosis, and Vascular Biology*. 2011;31(12):2975-81.  
46  
47
- 48 36. Boland MR, Shahn Z, Madigan D, Hripacsak G, Tatonetti NP. Birth month affects  
49 lifetime disease risk: a phenome-wide method. *Journal of the American Medical*  
50 *Informatics Association*. 2015;22(5):1042-53.  
51  
52
- 53 37. Didikoglu A, Nair N, Robinson AC, Roncaroli F, Pendleton N, Payton A, et al. The  
54 effect of season of birth on brain epigenome-wide DNA methylation of older adults.  
55 *Journal of Developmental Origins of Health and Disease*. 2022;13(3):367-77.  
56  
57  
58  
59  
60

- 1  
2  
3 38. Abeliansky AL, Strulik H. Season of birth, health and aging. *Economics & Human*  
4 *Biology*. 2020;36:100812.  
5  
6 39. Verachtert P, De Fraine B, Onghena P, Ghesquière P. Season of birth and school  
7 success in the early years of primary education. *Oxford Review of Education*.  
8 2010;36(3):285-306.  
9  
10 40. Department of Education. Month of Birth and Education. Schools Analysis and  
11 Research Division. 2010. Contract No.: Research Report DFE-RR017.  
12  
13 41. Berndt H, Fors S. Childhood living conditions, education and health among the  
14 oldest old in Sweden. *Ageing & Society*. 2016;36(3):631-48.  
15  
16 42. Haas SA, Glymour MM, Berkman LF. Childhood health and labor market inequality  
17 over the life course. *Journal of Health and Social Behavior*. 2011;52(3):298-313.  
18  
19 43. Montez JK, Hayward MD. *Early life conditions and later life mortality*.  
20 International Handbook of Adult Mortality: Springer; 2011. p. 187-206.  
21  
22 44. Fry A, Littlejohns TJ, Sudlow C, Doherty N, Adamska L, Sprosen T, et al.  
23 Comparison of sociodemographic and health-related characteristics of UK Biobank  
24 participants with those of the general population. *American Journal of*  
25 *Epidemiology*. 2017;186(9):1026-34.  
26  
27  
28  
29  
30  
31  
32  
33  
34

### 35 **List of the figures and tables**

36  
37 **Figure 1** The pathways of early life factors and impact on frailty among adults

38  
39 **Figure 2** Generalised structural equation models to identify the association between early  
40 life factors and frailty index, and education as mediators of the relationship between early  
41 life factors and frailty index. Note: \*Significant at 0.05; † Significant at 0.0001  
42  
43  
44  
45

46 **Table 1** Subject characteristics

47  
48 **Table 2** Total, direct, and indirect effects of early life factors on frailty index  
49  
50  
51  
52  
53  
54  
55  
56  
57  
58  
59  
60

**Table 1.** Subject characteristics (n=502,489)

| Variable                            | Percentage<br>or mean<br>(SD)* | Mean (SD) of<br>frailty index** | Bivariate<br>association with<br>frailty index*** |
|-------------------------------------|--------------------------------|---------------------------------|---------------------------------------------------|
| Frailty index, mean (SD)            | 0.14(0.08)                     |                                 |                                                   |
| <i>Early-life factors</i>           |                                |                                 |                                                   |
| Maternal smoking around birth,<br>% |                                |                                 | p<0.0001                                          |
| No                                  | 70.75%                         | 0.133(0.073)                    |                                                   |
| Yes                                 | 29.25%                         | 0.146(0.078)                    |                                                   |
| Breastfed as a baby, %              |                                |                                 | p<0.0001                                          |
| No                                  | 27.65%                         | 0.137(0.076)                    |                                                   |
| Yes                                 | 72.35%                         | 0.134(0.074)                    |                                                   |
| Birthweight, %                      |                                |                                 | p<0.0001                                          |
| Low birth weight                    | 10.26%                         | 0.149(0.080)                    |                                                   |
| Normal birth weight                 | 76.34%                         | 0.131(0.073)                    |                                                   |
| High birth weight                   | 13.40%                         | 0.136(0.076)                    |                                                   |
| Birth month, %                      |                                |                                 | p=0.0002                                          |
| January                             | 8.44%                          | 0.138(0.076)                    |                                                   |
| February                            | 7.96%                          | 0.137(0.075)                    |                                                   |
| March                               | 8.98%                          | 0.138(0.075)                    |                                                   |
| April                               | 8.59%                          | 0.139(0.076)                    |                                                   |
| May                                 | 8.98%                          | 0.138(0.076)                    |                                                   |
| June                                | 8.45%                          | 0.139(0.076)                    |                                                   |
| July                                | 8.48%                          | 0.139(0.076)                    |                                                   |



|    |                          |             |                  |
|----|--------------------------|-------------|------------------|
| 1  |                          |             |                  |
| 2  |                          |             |                  |
| 3  | August                   | 8.24%       | 0.138(0.076)     |
| 4  |                          |             |                  |
| 5  | September                | 8.14%       | 0.138(0.075)     |
| 6  |                          |             |                  |
| 7  | October                  | 8.06%       | 0.137(0.076)     |
| 8  |                          |             |                  |
| 9  |                          |             |                  |
| 10 | November                 | 7.63%       | 0.137(0.075)     |
| 11 |                          |             |                  |
| 12 | December                 | 8.03%       | 0.138(0.076)     |
| 13 |                          |             |                  |
| 14 |                          |             |                  |
| 15 | Perinatal diseases, %    |             | p<0.0001         |
| 16 |                          |             |                  |
| 17 | No                       | 99.82%      | 0.138(0.075)     |
| 18 |                          |             |                  |
| 19 | Yes                      | 0.18%       | 0.149(0.084)     |
| 20 |                          |             |                  |
| 21 |                          |             |                  |
| 22 | Born in the UK, %        |             | p=0.0381         |
| 23 |                          |             |                  |
| 24 | No                       | 8.96%       | 0.137(0.076)     |
| 25 |                          |             |                  |
| 26 | Yes                      | 91.04%      | 0.138(0.075)     |
| 27 |                          |             |                  |
| 28 |                          |             |                  |
| 29 | <i>Sociodemographics</i> |             |                  |
| 30 |                          |             |                  |
| 31 | Age (years), mean (SD)   | 56.53(8.10) | R=0.16, p<0.0001 |
| 32 |                          |             |                  |
| 33 | Gender, %                |             | p<0.0001         |
| 34 |                          |             |                  |
| 35 | Female                   | 54.40%      | 0.141(0.075)     |
| 36 |                          |             |                  |
| 37 | Male                     | 45.60%      | 0.134(0.076)     |
| 38 |                          |             |                  |
| 39 |                          |             |                  |
| 40 | Ethnicity, %             |             | p<0.0001         |
| 41 |                          |             |                  |
| 42 | Other                    | 5.41%       | 0.141(0.078)     |
| 43 |                          |             |                  |
| 44 | Caucasian                | 94.59%      | 0.138(0.075)     |
| 45 |                          |             |                  |
| 46 |                          |             |                  |
| 47 | Education, %             |             | p<0.0001         |
| 48 |                          |             |                  |
| 49 | Less than college        | 67.27%      | 0.145(0.077)     |
| 50 |                          |             |                  |
| 51 | College or university    | 32.73%      | 0.122 (0.069)    |
| 52 |                          |             |                  |
| 53 | degree                   |             |                  |
| 54 |                          |             |                  |
| 55 |                          |             |                  |
| 56 | <i>Health behaviours</i> |             |                  |
| 57 |                          |             |                  |
| 58 |                          |             |                  |
| 59 |                          |             |                  |
| 60 |                          |             |                  |

|                                           |        |              |          |
|-------------------------------------------|--------|--------------|----------|
| Moderate or vigorous physical activity, % |        |              | p<0.0001 |
| None                                      | 10.75% | 0.160(0.085) |          |
| 1 day                                     | 7.11%  | 0.134(0.072) |          |
| 2 days                                    | 13.40% | 0.133(0.072) |          |
| 3 days or more                            | 68.75% | 0.135(0.073) |          |
| Current alcohol consumption, %            |        |              | p<0.0001 |
| No                                        | 8.08%  | 0.166(0.088) |          |
| Yes                                       | 91.92% | 0.135(0.074) |          |
| Current smoking, %                        |        |              | p<0.0001 |
| No                                        | 89.39% | 0.135(0.074) |          |
| Yes                                       | 10.61% | 0.159(0.084) |          |

**Note:** \* Presented are means (standard deviation) for continuous variables and percentages for categorical variables. The maternal smoking variable includes 13.86% missing data, the breastfed as a baby variable includes 23.64% missing data, the birthweight variable includes 44.88% missing data, the education variable includes 2.02% missing data, and the moderate or vigorous physical activity variable includes 2.43% missing data. \*\* Presented are the means (standard deviation) of the frailty index per group. \*\*\* Bivariate analyses are unpaired t-tests for binary variables, ANOVA for ordinal variables, and Pearson's correlation for continuous variables.

**Table 2.** Total, direct, and indirect effects of early life factors on frailty index

|                               | <b>Total effects</b> | <b>Direct effects</b> | <b>Indirect effects</b> |
|-------------------------------|----------------------|-----------------------|-------------------------|
| Breastfed as a baby           | -0.031 (0.002)†      | -0.022 (0.002)†       | -0.009 (0.000)†         |
| Maternal smoking around birth | 0.079 (0.002)†       | 0.068 (0.002)†        | 0.011 (0.000)†          |
| Low birth weight              | 0.045 (0.002)†       | 0.041 (0.002)†        | 0.003 (0.000)†          |
| High birth weight             | 0.015 (0.002)†       | 0.013 (0.002)†        | 0.001 (0.000)†          |
| Birth month (cos)             | -0.007 (0.002)*      | -0.006 (0.002)*       | -0.001 (0.000)*         |
| Perinatal diseases            | 0.007 (0.002)†       | 0.007 (0.002)†        | 0.000 (0.000)           |
| Born in the UK                | 0.018 (0.002)†       | 0.002 (0.002)         | 0.016 (0.001)†          |

For peer review only

1  
2  
3  
4  
5  
6  
7  
8  
9  
10  
11  
12  
13  
14  
15  
16  
17  
18  
19  
20  
21  
22  
23  
24  
25  
26  
27  
28  
29  
30  
31  
32  
33  
34  
35  
36  
37  
38  
39  
40  
41  
42  
43  
44  
45  
46  
47  
48  
49  
50  
51  
52  
53  
54  
55  
56  
57  
58  
59  
60

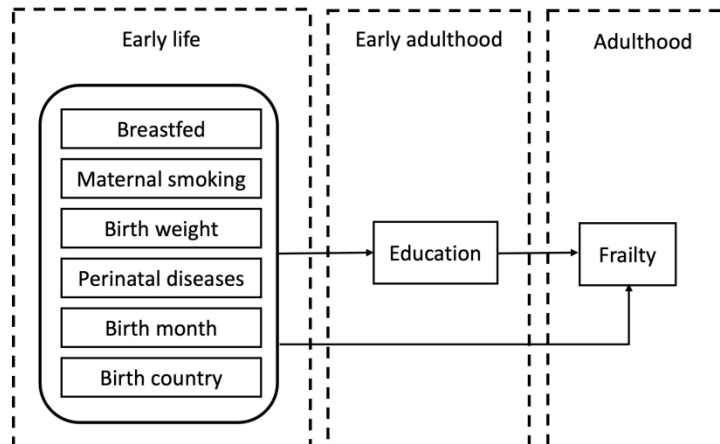

The pathways of early life factors and impact on frailty among adults

274x190mm (277 x 277 DPI)

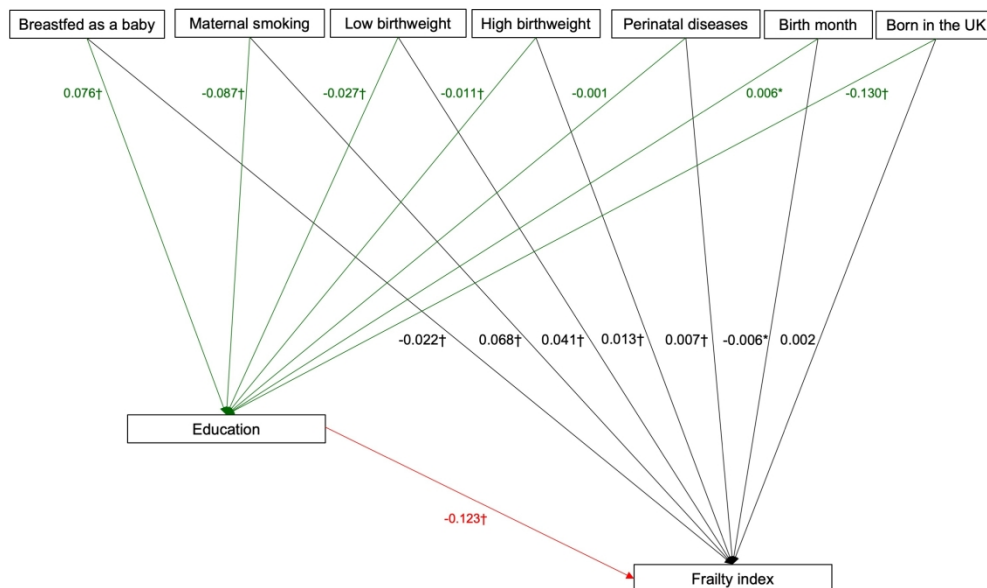

Generalised structural equation models to identify the association between early life factors and frailty index, and education as mediators of the relationship between early life factors and frailty index. Note: \*Significant at 0.05; † Significant at 0.0001

274x190mm (277 x 277 DPI)

## Supplementary Material: Pathways linking early life factors and frailty among middle-aged and older adults in England: Findings from UK Biobank

**Supplementary Table 1.** Variables included in the UK Biobank frailty indices

| Item | Variable                                  | Definition                                                                                                                      | Coding                                                                  |
|------|-------------------------------------------|---------------------------------------------------------------------------------------------------------------------------------|-------------------------------------------------------------------------|
|      | Sensory                                   |                                                                                                                                 |                                                                         |
| 1    | Glaucoma                                  | Self-report of physician-diagnosed glaucoma                                                                                     | 0=no; 1=yes                                                             |
| 2    | Cataracts                                 | Self-report of physician-diagnosed glaucoma                                                                                     | 0=no; 1=yes                                                             |
| 3    | Hearing difficulty                        | Self-report experiencing hearing difficulty                                                                                     | 0=no; 1=yes/completely deaf                                             |
|      | Cranial                                   |                                                                                                                                 |                                                                         |
| 4    | Migraine                                  | Self-report of physician-diagnosed migraine                                                                                     | 0=no; 1=yes                                                             |
| 5    | Dental problems                           | Self-report of physician-diagnosed dental problems, i.e., ulcers, painful gums, bleeding gums, loose teeth, toothache, dentures | 0=none; 1=any                                                           |
|      | Mental well-being                         |                                                                                                                                 |                                                                         |
| 6    | Self-rated health                         | Self-rated health in 4 Likert scale                                                                                             | 0=excellent; 0.25=good; 0.5=fair; 1=poor                                |
| 7    | Fatigue                                   | Self-report of frequency of tiredness / lethargy in last two weeks                                                              | 0=not at all; 0.25=several days; 0.5=more than half; 1=nearly every day |
| 8    | Sleep                                     | Self-report experiencing of sleeplessness/ insomnia                                                                             | 0=never/rarely; 0.5=sometimes; 1=usually                                |
| 9    | Depressed feelings                        | Self-report of frequency having depressed feeling in last two weeks                                                             | 0=not at all; 0.5=several days; 0.75=more than half; 1=nearly every day |
| 10   | Self-described nervous personality        | Self-report of having nervous personality                                                                                       | 0=no; 1=yes                                                             |
| 11   | Severe anxiety/ panic attacks             | Self-report of physician-diagnosed severe anxiety/panic attacks                                                                 | 0=no; 1=yes                                                             |
| 12   | Common to feel loneliness                 | Self-report of feeling lonely commonly                                                                                          | 0=no; 1=yes                                                             |
| 13   | Sense of misery (ever/never)              | Self-report of ever having sense of misery                                                                                      | 0=no; 1=yes                                                             |
|      | Infirmity                                 |                                                                                                                                 |                                                                         |
| 14   | Infirmity                                 | Self-report of having long-standing illness or disability                                                                       | 0=no; 1=yes                                                             |
| 15   | Falls in last year                        | Self-report of experiencing falls last year                                                                                     | 0=no falls; 0.5=one fall; 1=more than one fall                          |
| 16   | Fractures/broken bones in last five years | Self-report of experiencing fractures/broken bones in last five years                                                           | 0=no; 1=yes                                                             |
|      | Cardiometabolic                           |                                                                                                                                 |                                                                         |
| 17   | Diabetes                                  | Self-report of physician-diagnosed diabetes                                                                                     | 0=no; 1=yes                                                             |
| 18   | Myocardial infarction                     | Self-report of physician-diagnosed myocardial infarction                                                                        | 0=no; 1=yes                                                             |
| 19   | Angina                                    | Self-report of physician-diagnosed angina                                                                                       | 0=no; 1=yes                                                             |
| 20   | Stroke                                    | Self-report of physician-diagnosed stroke                                                                                       | 0=no; 1=yes                                                             |
| 21   | High blood pressure                       | Self-report of physician-diagnosed high blood pressure                                                                          | 0=no; 1=yes                                                             |
| 22   | Hypothyroidism                            | Self-report of physician-diagnosed hypothyroidism                                                                               | 0=no; 1=yes                                                             |
| 23   | Deep-vein thrombosis                      | Self-report of physician-diagnosed deep-vein thrombosis                                                                         | 0=no; 1=yes                                                             |
| 24   | High cholesterol                          | Self-report of physician-diagnosed high cholesterol                                                                             | 0=no; 1=yes                                                             |

|    |                                              |                                                                           |                                                 |
|----|----------------------------------------------|---------------------------------------------------------------------------|-------------------------------------------------|
|    | Respiratory                                  |                                                                           |                                                 |
| 25 | Breathing                                    | Self-report of having wheeze in last year                                 | 0=no; 1=yes                                     |
| 26 | Pneumonia                                    | Self-report of physician-diagnosed pneumonia                              | 0=no; 1=yes                                     |
| 27 | Chronic bronchitis/emphysema                 | Self-report of physician-diagnosed chronic bronchitis/emphysema           | 0=no; 1=yes                                     |
| 28 | Asthma                                       | Self-report of physician-diagnosed asthma                                 | 0=no; 1=yes                                     |
|    | Musculoskeletal                              |                                                                           |                                                 |
| 29 | Rheumatoid arthritis                         | Self-report of physician-diagnosed rheumatoid arthritis                   | 0=no; 1=yes                                     |
| 30 | Osteoarthritis                               | Self-report of physician-diagnosed osteoarthritis                         | 0=no; 1=yes                                     |
| 31 | Gout                                         | Self-report of physician-diagnosed gout                                   | 0=no; 1=yes                                     |
| 32 | Osteoporosis                                 | Self-report of physician-diagnosed osteoporosis                           | 0=no; 1=yes                                     |
|    | Immunological                                |                                                                           |                                                 |
| 33 | Hay fever, allergic rhinitis or eczema       | Self-report of physician-diagnosed hay fever, allergic rhinitis or eczema | 0=no; 1=yes                                     |
| 34 | Psoriasis                                    | Self-report of physician-diagnosed psoriasis                              | 0=no; 1=yes                                     |
|    | Cancer                                       |                                                                           |                                                 |
| 35 | Any cancer diagnosis                         | Self-report of physician-diagnosed any cancer                             | 0=no; 1=yes                                     |
| 36 | Multiple cancers diagnosed (number reported) | Self-report of physician-diagnosed multiple cancer                        | 0=no cancer or single cancer; 1=multiple cancer |
|    | Pain                                         |                                                                           |                                                 |
| 37 | Chest pain                                   | Self-report of ever experiencing chest pain                               | 0=no; 1=yes                                     |
| 38 | Head and/or neck pain                        | Self-report of ever experiencing head and/or neck pain                    | 0=no; 1=yes                                     |
| 39 | Back pain                                    | Self-report of ever experiencing back pain                                | 0=no; 1=yes                                     |
| 40 | Stomach/abdominal pain                       | Self-report of ever experiencing stomach/abdominal pain                   | 0=no; 1=yes                                     |
| 41 | Hip pain                                     | Self-report of ever experiencing hip pain                                 | 0=no; 1=yes                                     |
| 42 | Knee pain                                    | Self-report of ever experiencing knee pain                                | 0=no; 1=yes                                     |
| 43 | Whole-body pain                              | Self-report of ever experiencing whole-body pain                          | 0=no; 1=yes                                     |
| 44 | Facial pain                                  | Self-report of ever experiencing facial pain                              | 0=no; 1=yes                                     |
| 45 | Sciatica                                     | Self-report of physician-diagnosed sciatica                               | 0=no; 1=yes                                     |
|    | Gastrointestinal                             |                                                                           |                                                 |
| 46 | Gastric reflux                               | Self-report of physician-diagnosed gastric reflux                         | 0=no; 1=yes                                     |
| 47 | Hiatus hernia                                | Self-report of physician-diagnosed hiatus hernia                          | 0=no; 1=yes                                     |
| 48 | Gall stones                                  | Self-report of physician-diagnosed gall stones                            | 0=no; 1=yes                                     |
| 49 | Diverticulitis                               | Self-report of physician-diagnosed diverticulitis                         | 0=no; 1=yes                                     |

Notes: Deficit points are summed for each individual, and divided by the total number of deficits, to produce a frailty index with a range from 0 to 1.

**Supplementary Table 2.** Regression models predicting frailty index

|                     | <b>Non-imputed data<sup>1</sup></b> | <b>Imputed data<sup>1</sup></b> |
|---------------------|-------------------------------------|---------------------------------|
|                     | <b>(n=190,575)</b>                  | <b>(n=502,489)</b>              |
| Breastfed as a baby | -0.0042 (-0.0048,-0.0035)†          | -0.0045 (-0.0051,-0.0038)†      |
| Maternal smoking    | 0.0118 (0.0111,0.0125)†             | 0.0122 (0.0116,0.0128)†         |
| Low birthweight     | 0.0108 (0.0097,0.0118)†             | 0.0114 (0.0105,0.0122)†         |
| High birthweight    | 0.0030 (0.0021,0.0039)†             | 0.0036 (0.0028,0.0044)†         |
| Perinatal diseases  | 0.0117 (0.0049,0.0185)*             | 0.0107 (0.0046,0.0167)*         |
| Birth month (cos)   | -0.0006 (-0.0011,-0.000)*           | -0.0006 (-0.0010,-0.0002)*      |
| Born in the UK      | 0.0024 (0.0011,0.0037)†             | 0.0018 (0.0006,0.0030)*         |
| Education           | -0.0140 (-0.0147,-0.0134)†          | -0.0144 (-0.0150,-0.0139)†      |
| Age (years)         | 0.0015 (0.0015,0.0015)†             | 0.0015 (0.0015,0.0016)†         |
| Male                | -0.0084 (-0.0090,-0.0078)†          | -0.0084 (-0.0090,-0.0079)†      |
| Caucasian ethnicity | -0.0069 (-0.0088,-0.0050)†          | -0.0068 (-0.0085,-0.0051)†      |
| Smoking             | 0.0244 (0.0234,0.0254)†             | 0.0248 (0.0239,0.0257)†         |
| Alcohol drinking    | -0.0260 (-0.0272,-0.0248)†          | -0.0268 (-0.0279,-0.0258)†      |
| Physical activity   | -0.0065 (-0.0068,-0.0062)†          | -0.0069 (-0.0072,-0.0067)†      |
| Intercept           | 0.0976 (0.0947,0.1005)†             | 0.0998 (0.0972,0.1024)†         |

Note: <sup>1</sup> presented are coefficients (95% confidence intervals); \*Significant at 0.05; † Significant at 0.0001. Non-imputed analysis was based on 214,104 respondents with complete information on all variables. The maternal smoking variable includes 13.86% missing data, the breastfed as a baby variable includes 23.64% missing data, the birthweight variable includes 44.88% missing data, the education variable includes 2.02% missing data, and the moderate or vigorous physical activity variable includes 2.43% missing data. The imputed analysis included all the respondents (n=502,489).



# Reporting checklist for cross sectional study.

Based on the STROBE cross sectional guidelines.

## Instructions to authors

Complete this checklist by entering the page numbers from your manuscript where readers will find each of the items listed below.

Your article may not currently address all the items on the checklist. Please modify your text to include the missing information. If you are certain that an item does not apply, please write "n/a" and provide a short explanation.

Upload your completed checklist as an extra file when you submit to a journal.

In your methods section, say that you used the STROBE cross sectional reporting guidelines, and cite them as:

von Elm E, Altman DG, Egger M, Pocock SJ, Gotsche PC, Vandenbroucke JP. The Strengthening the Reporting of Observational Studies in Epidemiology (STROBE) Statement: guidelines for reporting observational studies.

|                           |                     |                                                                                    | Page   |
|---------------------------|---------------------|------------------------------------------------------------------------------------|--------|
|                           |                     | Reporting Item                                                                     | Number |
| <b>Title and abstract</b> |                     |                                                                                    |        |
| Title                     | <a href="#">#1a</a> | Indicate the study's design with a commonly used term in the title or the abstract | 1      |
| Abstract                  | <a href="#">#1b</a> | Provide in the abstract an informative and balanced summary                        | 3      |

of what was done and what was found

## Introduction

Background / [#2](#) Explain the scientific background and rationale for the 4  
 rationale investigation being reported

Objectives [#3](#) State specific objectives, including any prespecified 6  
 hypotheses

## Methods

Study design [#4](#) Present key elements of study design early in the paper 7

Setting [#5](#) Describe the setting, locations, and relevant dates, including 7  
 periods of recruitment, exposure, follow-up, and data collection

Eligibility criteria [#6a](#) Give the eligibility criteria, and the sources and methods of 7  
 selection of participants.

[#7](#) Clearly define all outcomes, exposures, predictors, potential 8-9  
 confounders, and effect modifiers. Give diagnostic criteria, if applicable

Data sources / [#8](#) For each variable of interest give sources of data and details of 9  
 measurement methods of assessment (measurement). Describe comparability of assessment methods if there is more than one group. Give information separately for for exposed and unexposed groups if applicable.

Bias [#9](#) Describe any efforts to address potential sources of bias 10

Study size [#10](#) Explain how the study size was arrived at 8

|    |                  |                      |                                                                   |      |
|----|------------------|----------------------|-------------------------------------------------------------------|------|
| 1  | Quantitative     | <a href="#">#11</a>  | Explain how quantitative variables were handled in the            | 8-9  |
| 2  |                  |                      |                                                                   |      |
| 3  | variables        |                      | analyses. If applicable, describe which groupings were chosen,    |      |
| 4  |                  |                      |                                                                   |      |
| 5  |                  |                      | and why                                                           |      |
| 6  |                  |                      |                                                                   |      |
| 7  |                  |                      |                                                                   |      |
| 8  |                  |                      |                                                                   |      |
| 9  | Statistical      | <a href="#">#12a</a> | Describe all statistical methods, including those used to control | 9-10 |
| 10 |                  |                      |                                                                   |      |
| 11 | methods          |                      | for confounding                                                   |      |
| 12 |                  |                      |                                                                   |      |
| 13 |                  |                      |                                                                   |      |
| 14 | Statistical      | <a href="#">#12b</a> | Describe any methods used to examine subgroups and                | 10   |
| 15 |                  |                      |                                                                   |      |
| 16 | methods          |                      | interactions                                                      |      |
| 17 |                  |                      |                                                                   |      |
| 18 |                  |                      |                                                                   |      |
| 19 | Statistical      | <a href="#">#12c</a> | Explain how missing data were addressed                           | 10   |
| 20 |                  |                      |                                                                   |      |
| 21 | methods          |                      |                                                                   |      |
| 22 |                  |                      |                                                                   |      |
| 23 |                  |                      |                                                                   |      |
| 24 |                  |                      |                                                                   |      |
| 25 | Statistical      | <a href="#">#12d</a> | If applicable, describe analytical methods taking account of      | 8    |
| 26 |                  |                      |                                                                   |      |
| 27 | methods          |                      | sampling strategy                                                 |      |
| 28 |                  |                      |                                                                   |      |
| 29 |                  |                      |                                                                   |      |
| 30 | Statistical      | <a href="#">#12e</a> | Describe any sensitivity analyses                                 | 10   |
| 31 |                  |                      |                                                                   |      |
| 32 | methods          |                      |                                                                   |      |
| 33 |                  |                      |                                                                   |      |
| 34 |                  |                      |                                                                   |      |
| 35 |                  |                      |                                                                   |      |
| 36 | <b>Results</b>   |                      |                                                                   |      |
| 37 |                  |                      |                                                                   |      |
| 38 |                  |                      |                                                                   |      |
| 39 | Participants     | <a href="#">#13a</a> | Report numbers of individuals at each stage of study—eg           | 7    |
| 40 |                  |                      |                                                                   |      |
| 41 |                  |                      | numbers potentially eligible, examined for eligibility, confirmed |      |
| 42 |                  |                      |                                                                   |      |
| 43 |                  |                      | eligible, included in the study, completing follow-up, and        |      |
| 44 |                  |                      |                                                                   |      |
| 45 |                  |                      | analysed. Give information separately for for exposed and         |      |
| 46 |                  |                      |                                                                   |      |
| 47 |                  |                      | unexposed groups if applicable.                                   |      |
| 48 |                  |                      |                                                                   |      |
| 49 |                  |                      |                                                                   |      |
| 50 |                  |                      |                                                                   |      |
| 51 | Participants     | <a href="#">#13b</a> | Give reasons for non-participation at each stage                  | n/a  |
| 52 |                  |                      |                                                                   |      |
| 53 |                  |                      |                                                                   |      |
| 54 | Participants     | <a href="#">#13c</a> | Consider use of a flow diagram                                    | n/a  |
| 55 |                  |                      |                                                                   |      |
| 56 |                  |                      |                                                                   |      |
| 57 | Descriptive data | <a href="#">#14a</a> | Give characteristics of study participants (eg demographic,       | 11   |
| 58 |                  |                      |                                                                   |      |
| 59 |                  |                      |                                                                   |      |
| 60 |                  |                      |                                                                   |      |

clinical, social) and information on exposures and potential confounders. Give information separately for exposed and unexposed groups if applicable.

|    |                   |                      |                                                                                                                                                                                                          |       |
|----|-------------------|----------------------|----------------------------------------------------------------------------------------------------------------------------------------------------------------------------------------------------------|-------|
| 8  | Descriptive data  | <a href="#">#14b</a> | Indicate number of participants with missing data for each variable of interest                                                                                                                          | 11    |
| 9  |                   |                      |                                                                                                                                                                                                          |       |
| 10 |                   |                      |                                                                                                                                                                                                          |       |
| 11 |                   |                      |                                                                                                                                                                                                          |       |
| 12 |                   |                      |                                                                                                                                                                                                          |       |
| 13 | Outcome data      | <a href="#">#15</a>  | Report numbers of outcome events or summary measures. Give information separately for exposed and unexposed groups if applicable.                                                                        | 11    |
| 14 |                   |                      |                                                                                                                                                                                                          |       |
| 15 |                   |                      |                                                                                                                                                                                                          |       |
| 16 |                   |                      |                                                                                                                                                                                                          |       |
| 17 |                   |                      |                                                                                                                                                                                                          |       |
| 18 |                   |                      |                                                                                                                                                                                                          |       |
| 19 |                   |                      |                                                                                                                                                                                                          |       |
| 20 |                   |                      |                                                                                                                                                                                                          |       |
| 21 | Main results      | <a href="#">#16a</a> | Give unadjusted estimates and, if applicable, confounder-adjusted estimates and their precision (eg, 95% confidence interval). Make clear which confounders were adjusted for and why they were included | 11-12 |
| 22 |                   |                      |                                                                                                                                                                                                          |       |
| 23 |                   |                      |                                                                                                                                                                                                          |       |
| 24 |                   |                      |                                                                                                                                                                                                          |       |
| 25 |                   |                      |                                                                                                                                                                                                          |       |
| 26 |                   |                      |                                                                                                                                                                                                          |       |
| 27 |                   |                      |                                                                                                                                                                                                          |       |
| 28 |                   |                      |                                                                                                                                                                                                          |       |
| 29 |                   |                      |                                                                                                                                                                                                          |       |
| 30 |                   |                      |                                                                                                                                                                                                          |       |
| 31 | Main results      | <a href="#">#16b</a> | Report category boundaries when continuous variables were categorized                                                                                                                                    | 11-12 |
| 32 |                   |                      |                                                                                                                                                                                                          |       |
| 33 |                   |                      |                                                                                                                                                                                                          |       |
| 34 |                   |                      |                                                                                                                                                                                                          |       |
| 35 |                   |                      |                                                                                                                                                                                                          |       |
| 36 | Main results      | <a href="#">#16c</a> | If relevant, consider translating estimates of relative risk into absolute risk for a meaningful time period                                                                                             | 12    |
| 37 |                   |                      |                                                                                                                                                                                                          |       |
| 38 |                   |                      |                                                                                                                                                                                                          |       |
| 39 |                   |                      |                                                                                                                                                                                                          |       |
| 40 |                   |                      |                                                                                                                                                                                                          |       |
| 41 |                   |                      |                                                                                                                                                                                                          |       |
| 42 | Other analyses    | <a href="#">#17</a>  | Report other analyses done—e.g., analyses of subgroups and interactions, and sensitivity analyses                                                                                                        | 12-13 |
| 43 |                   |                      |                                                                                                                                                                                                          |       |
| 44 |                   |                      |                                                                                                                                                                                                          |       |
| 45 |                   |                      |                                                                                                                                                                                                          |       |
| 46 |                   |                      |                                                                                                                                                                                                          |       |
| 47 | <b>Discussion</b> |                      |                                                                                                                                                                                                          |       |
| 48 |                   |                      |                                                                                                                                                                                                          |       |
| 49 |                   |                      |                                                                                                                                                                                                          |       |
| 50 | Key results       | <a href="#">#18</a>  | Summarise key results with reference to study objectives                                                                                                                                                 | 13    |
| 51 |                   |                      |                                                                                                                                                                                                          |       |
| 52 |                   |                      |                                                                                                                                                                                                          |       |
| 53 | Limitations       | <a href="#">#19</a>  | Discuss limitations of the study, taking into account sources of potential bias or imprecision. Discuss both direction and magnitude of any potential bias.                                              | 14-15 |
| 54 |                   |                      |                                                                                                                                                                                                          |       |
| 55 |                   |                      |                                                                                                                                                                                                          |       |
| 56 |                   |                      |                                                                                                                                                                                                          |       |
| 57 |                   |                      |                                                                                                                                                                                                          |       |
| 58 |                   |                      |                                                                                                                                                                                                          |       |
| 59 |                   |                      |                                                                                                                                                                                                          |       |
| 60 |                   |                      |                                                                                                                                                                                                          |       |

|    |                          |                     |                                                                      |       |
|----|--------------------------|---------------------|----------------------------------------------------------------------|-------|
| 1  | Interpretation           | <a href="#">#20</a> | Give a cautious overall interpretation considering objectives,       | 14-15 |
| 2  |                          |                     | limitations, multiplicity of analyses, results from similar studies, |       |
| 3  |                          |                     | and other relevant evidence.                                         |       |
| 4  |                          |                     |                                                                      |       |
| 5  |                          |                     |                                                                      |       |
| 6  |                          |                     |                                                                      |       |
| 7  |                          |                     |                                                                      |       |
| 8  |                          |                     |                                                                      |       |
| 9  | Generalisability         | <a href="#">#21</a> | Discuss the generalisability (external validity) of the study        | 14    |
| 10 |                          |                     | results                                                              |       |
| 11 |                          |                     |                                                                      |       |
| 12 |                          |                     |                                                                      |       |
| 13 |                          |                     |                                                                      |       |
| 14 | <b>Other Information</b> |                     |                                                                      |       |
| 15 |                          |                     |                                                                      |       |
| 16 |                          |                     |                                                                      |       |
| 17 | Funding                  | <a href="#">#22</a> | Give the source of funding and the role of the funders for the       | 16    |
| 18 |                          |                     | present study and, if applicable, for the original study on which    |       |
| 19 |                          |                     | the present article is based                                         |       |
| 20 |                          |                     |                                                                      |       |
| 21 |                          |                     |                                                                      |       |
| 22 |                          |                     |                                                                      |       |
| 23 |                          |                     |                                                                      |       |
| 24 |                          |                     |                                                                      |       |

25 The STROBE checklist is distributed under the terms of the Creative Commons Attribution License  
26 CC-BY. This checklist was completed on 17. September 2021 using <https://www.goodreports.org/>, a  
27 tool made by the [EQUATOR Network](#) in collaboration with [Penelope.ai](#)  
28  
29  
30  
31  
32  
33  
34  
35  
36  
37  
38  
39  
40  
41  
42  
43  
44  
45  
46  
47  
48  
49  
50  
51  
52  
53  
54  
55  
56  
57  
58  
59  
60

# BMJ Open

## Education mediating the associations between early life factors and frailty: a cross-sectional study of the UK Biobank

|                                 |                                                                                                                                                                                                                                                                                                                                                                                                                                                                                                                                                                                                                                                                                                                                                                                                                                 |
|---------------------------------|---------------------------------------------------------------------------------------------------------------------------------------------------------------------------------------------------------------------------------------------------------------------------------------------------------------------------------------------------------------------------------------------------------------------------------------------------------------------------------------------------------------------------------------------------------------------------------------------------------------------------------------------------------------------------------------------------------------------------------------------------------------------------------------------------------------------------------|
| Journal:                        | <i>BMJ Open</i>                                                                                                                                                                                                                                                                                                                                                                                                                                                                                                                                                                                                                                                                                                                                                                                                                 |
| Manuscript ID                   | bmjopen-2021-057511.R2                                                                                                                                                                                                                                                                                                                                                                                                                                                                                                                                                                                                                                                                                                                                                                                                          |
| Article Type:                   | Original research                                                                                                                                                                                                                                                                                                                                                                                                                                                                                                                                                                                                                                                                                                                                                                                                               |
| Date Submitted by the Author:   | 24-Jan-2023                                                                                                                                                                                                                                                                                                                                                                                                                                                                                                                                                                                                                                                                                                                                                                                                                     |
| Complete List of Authors:       | Maharani, Asri; The University of Manchester, Division of Population Health, Health Services Research & Primary Care; Manchester Metropolitan University, Department of Nursing<br>Didikoglu, Altug; The University of Manchester, Division of Neuroscience & Experimental Psychology<br>O'Neill, Terence; University of Manchester, Centre for Epidemiology Versus Arthritis, Division of Musculoskeletal & Dermatological Sciences; Manchester University NHS Foundation Trust, UK & NIHR Biomedical Research Centre<br>Pendleton, Neil; The University of Manchester, Division of Neuroscience & Experimental Psychology<br>Canal, Maria; The University of Manchester, Division of Neuroscience & Experimental Psychology<br>Payton, Antony; The University of Manchester, Division of Informatics, Imaging & Data Sciences |
| <b>Primary Subject Heading</b>: | Geriatric medicine                                                                                                                                                                                                                                                                                                                                                                                                                                                                                                                                                                                                                                                                                                                                                                                                              |
| Secondary Subject Heading:      | Epidemiology, Public health                                                                                                                                                                                                                                                                                                                                                                                                                                                                                                                                                                                                                                                                                                                                                                                                     |
| Keywords:                       | EPIDEMIOLOGY, GERIATRIC MEDICINE, SOCIAL MEDICINE                                                                                                                                                                                                                                                                                                                                                                                                                                                                                                                                                                                                                                                                                                                                                                               |
|                                 |                                                                                                                                                                                                                                                                                                                                                                                                                                                                                                                                                                                                                                                                                                                                                                                                                                 |

SCHOLARONE™  
Manuscripts

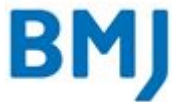

I, the Submitting Author has the right to grant and does grant on behalf of all authors of the Work (as defined in the below author licence), an exclusive licence and/or a non-exclusive licence for contributions from authors who are: i) UK Crown employees; ii) where BMJ has agreed a CC-BY licence shall apply, and/or iii) in accordance with the terms applicable for US Federal Government officers or employees acting as part of their official duties; on a worldwide, perpetual, irrevocable, royalty-free basis to BMJ Publishing Group Ltd ("BMJ") its licensees and where the relevant Journal is co-owned by BMJ to the co-owners of the Journal, to publish the Work in this journal and any other BMJ products and to exploit all rights, as set out in our [licence](#).

The Submitting Author accepts and understands that any supply made under these terms is made by BMJ to the Submitting Author unless you are acting as an employee on behalf of your employer or a postgraduate student of an affiliated institution which is paying any applicable article publishing charge ("APC") for Open Access articles. Where the Submitting Author wishes to make the Work available on an Open Access basis (and intends to pay the relevant APC), the terms of reuse of such Open Access shall be governed by a Creative Commons licence – details of these licences and which [Creative Commons](#) licence will apply to this Work are set out in our licence referred to above.

Other than as permitted in any relevant BMJ Author's Self Archiving Policies, I confirm this Work has not been accepted for publication elsewhere, is not being considered for publication elsewhere and does not duplicate material already published. I confirm all authors consent to publication of this Work and authorise the granting of this licence.

**Title Page****Title:**

Education mediating the associations between early life factors and frailty: a cross-sectional study of the UK Biobank

**Running Title:**

Early-life factors and frailty

**Keywords:**

UK Biobank, Early-life factors, frailty

**Authors and author affiliations:**

Asri Maharani, MD, PhD<sup>1\*</sup>, Altug Didikoglu, PhD<sup>2\*</sup>, Terence W O'Neill, MD, PhD<sup>3</sup>, Neil Pendleton, MD, PhD<sup>2</sup>, Maria Mercè Canal, PhD<sup>2</sup>, Antony Payton, PhD<sup>4</sup>

1) Division of Nursing, Midwifery, and Social Work, The University of Manchester, UK

2) Division of Neuroscience & Experimental Psychology, The University of Manchester, UK

3) Centre for Epidemiology Versus Arthritis, Division of Musculoskeletal & Dermatological Sciences, The University of Manchester, UK & NIHR Biomedical Research Centre, Manchester University NHS Foundation Trust, Manchester.

4) Division of Informatics, Imaging & Data Sciences, The University of Manchester, UK

\* These authors contributed equally to this work

**Corresponding author's full address and corresponding author's current email:**

**Name:** Altug Didikoglu

**Address:** Division of Neuroscience & Experimental Psychology, The University of Manchester, AV Hill Building, Oxford Road, M13 9PL, Manchester, UK

**Email:** altug.didikoglu@manchester.ac.uk

**Acknowledgements**



1  
2  
3 Altug Didikoglu was supported by a grant from the Republic of Turkey Ministry of National  
4 Education. This research has been conducted using the UK Biobank Resource under  
5  
6 Application Number 41877.  
7  
8

9  
10 **Conflicts of interest**

11  
12 All authors declare no conflicts of interest.  
13

14  
15 **Main text word counts:** 3492

16  
17 **Number of data elements:** 4  
18  
19  
20  
21  
22  
23  
24  
25  
26  
27  
28  
29  
30  
31  
32  
33  
34  
35  
36  
37  
38  
39  
40  
41  
42  
43  
44  
45  
46  
47  
48  
49  
50  
51  
52  
53  
54  
55  
56  
57  
58  
59  
60

## Abstract

**Objectives** Exposures in utero and during infancy may impact the development of diseases later in life. They may be linked with development of frailty though the mechanism is unclear. This study aims to determine the associations between early life risk factors and development of frailty amongst middle-aged and older adults as well as potential pathways via education, for any observed association.

**Design** A cross-sectional study.

**Settings** This study used data from UK Biobank, a large population-based cohort.

**Participants** 502,489 individuals aged 37-73 years were included in the analysis.

**Primary and secondary outcome measures** Early life factors in this study included being breastfed as a baby, maternal smoking, birth weight, the presence of perinatal diseases, birth month, and birth place (in or outside the UK). We developed a frailty index comprising 49 deficits. We used generalised structural equation modelling to examine the associations between early life factors and development of frailty and whether any observed association was mediated via educational attainment.

**Results** A history of breastfeeding and normal birth weight were associated with a lower frailty index while maternal smoking, the occurrence of perinatal diseases and birth month with a longer day length were associated with a higher frailty index. Educational level mediated the relationship between these early life factors and frailty index.

**Conclusions** This study highlights that biological and social risk occurring at different stages of life are related to the variations in frailty index in later life and suggests opportunities for prevention across the life course.

**Keywords** early life factors, frailty, generalised structural equation model, UK Biobank

## Article Summary

### Strengths and limitations of this study

- Using a large cohort of British adults in middle and older age, this study was sufficiently powered to identify associations between early life factors and frailty index.
- The questionnaire on early life factors was based on self-report and is therefore subject to recall error.
- The information on the health conditions of the parents is limited, and the data on the breast feeding duration is not available.
- As the cohort is not nationally representative, the findings cannot be generalised to the general population.

## Introduction

As the world's population ages, a major goal is the attainment of increased life expectancy accompanied by fewer years spent in poor health and with disability and dependency. The worldwide population of older people (65 years and above) is predicted to double from 0.7 billion (9%) in 2019 to 1.5 billion (16%) in 2050 [1]. In addition, there is evidence that the number of disability adjusted life years (DALY) among those aged 60 years and older is increasing (from 434 million in 1990 to 574 million in 2010) [2], which will increase demand for health and care services. As physical disability is an adverse outcome of frailty [3], more research in geriatrics and gerontology has focused on defining and recognising frailty among older people with the aim of determining preventive and interventional measures [4].

Frailty can be defined as a state of increased vulnerability resulting from an age-related decline in physiologic and cognitive reserves and function following stressor events [5]. The frailty index approach, developed by Rockwood et al. [6], measures frailty level as the number of deficits presents over the number of deficits considered, including symptoms, diagnoses, disabilities, and functional impairments. Frailty has become more common with the ageing of the population. A systematic review including 240 studies from 62 countries showed that 24% of people aged 50 years and older are frail as calculated using the frailty index approach [7].

Frailty has been found to be associated with adverse health outcomes including loss of mobility, disability, falls, hospitalisation, need for long-term care, and death [8-10].

Understanding the factors that are associated with frailty is thus important for developing interventions to prevent frailty and for providing directions for future public health policies.

A growing body of literature acknowledges that the first two decades of human life are critical in determining adult life trajectories. Among the early life factors, body size at birth [11-12], cigarette smoke exposure in utero [13], infants exclusively breastfed [14], birth month [15], and the presence of perinatal diseases [16] have been found to be associated with adult chronic

1  
2  
3 diseases. However, the study linking those factors and frailty is limited. In addition, the  
4  
5 evidence on the link between early life factors and occurrence of frailty have been mixed  
6  
7 [17,18]. The present study thus aims to determine the associations between early life factors,  
8  
9 including a history of being breastfed, maternal smoking, birth weight, the presence of  
10  
11 perinatal diseases, birth in or outside of the UK or outside the UK and birth month, and frailty  
12  
13 in UK adults.  
14  
15

16  
17 Furthermore, this study contributes to the literature investigating the determinants of health  
18  
19 in later life by exploring the pathways of early life factors that have a lasting impact on health  
20  
21 in middle and old age. The pathway hypothesis posits that early life conditions are important  
22  
23 not only because they are directly associated with late life but also because they shape later  
24  
25 life experiences [19,20], including restricted educational attainment and life chances. The  
26  
27 most frequently hypothesised pathway between circumstances in early stages of life and adult  
28  
29 health is adult socioeconomic status. Pakpahan et al. showed that socioeconomic factors in  
30  
31 adulthood, including education, mediate the link between childhood health and  
32  
33 socioeconomic conditions and self-rated health among older Europeans [19]. Because  
34  
35 interventions that target common pathways have the potential to reduce frailty, the  
36  
37 identification of the pathways of early life factors leading to frailty later in life has substantial  
38  
39 public health relevance for the translation of life course epidemiology into practice. The  
40  
41 present study considers whether any observed association between early life factors and frailty  
42  
43 could be attributed to differences in education attainment (Figure 1).  
44  
45  
46  
47  
48

## 49 **Methods**

### 50 **Source and Sample**

51  
52 Data were drawn from the UK Biobank, a prospective cohort study of the genetic,  
53  
54 environmental and lifestyle causes of diseases among adults in the UK [21]. The study  
55  
56 involved the collection of extensive questionnaire data and biological samples from, and the  
57  
58  
59  
60

1  
2  
3 performance of, physical examinations of more than 500,000 respondents enrolled at 22  
4 assessment sites in England, Scotland, and Wales between 2006 and 2010. Subjects who took  
5 part provided written informed consent for data collection, analysis and linkage; they also  
6 completed a touchscreen questionnaire, a nurse-led interview, and had their physical  
7 measurements taken. The UK Biobank invited adults who were registered with a general  
8 practitioner and who lived within reasonable traveling distance of the assessment centre. The  
9 current study includes 502,489 individuals aged 37-73 years who had study-specific available  
10 data and were not withdrawn from the study. This study was conducted as part of UK Biobank  
11 Project Number 41877 and is covered by the generic ethics approval for UK Biobank studies  
12 from the NHS National Research Ethics Service (16/NW/0274).

## 26 **Measures**

### 28 *Early life factors*

30 Information by questionnaire was obtained on: maternal smoking in the pre- and post-natal  
31 period, history of being breastfed as a baby, birth month, birthweight, the presence of perinatal  
32 diseases, and place of birth. We defined maternal smoking based on the question ‘Did your  
33 mother smoke regularly around the time when you were born?’ (Data-Field 1787).  
34 Respondents were categorised as having been breastfed as babies if they answered ‘yes’ to  
35 the question: ‘Were you breastfed when you were a baby?’ (Data-Field 1677). We retrieved  
36 information on birth month from the birth date (Data-Field 52) and treated it as the cosine of  
37 the values, representing the rhythmic seasonal length of day and night. We considered this  
38 might represent daylight time better than treating it as a categorical variable. This is an  
39 approach which we have used in a previous study [22]. Birth months of participants born in  
40 the UK and other countries in the southern hemisphere were converted to their antiphase.  
41 Information on birthweight was gathered by means of self-reported birthweight in kilograms  
42 (Data-Field 20022). We categorised the birth weight into low birth weight (<2,500 g), normal  
43  
44  
45  
46  
47  
48  
49  
50  
51  
52  
53  
54  
55  
56  
57  
58  
59  
60

1  
2  
3 birth weight (2,500 – 4,000 g), and high birth weight (>4,000 g). The presence of perinatal  
4 diseases ('ICD10 Chapter XVI: Certain conditions originating in the perinatal period') was  
5 coded as one based on self-reported medical history (Category 2416). We categorised the  
6 place birth of the respondents as born in the UK or outside the UK (Data-Field 1647). Answers  
7 of 'Do not know' or 'Prefer not to answer' were accepted as missing for all questions.  
8  
9

### 10 11 12 13 14 *Education*

15 The education variable represents the highest educational level completed by the respondents.  
16 Qualifications were categorised as high school or less (reference) and college or university  
17 degree (Data-Field 6138).  
18  
19

### 20 21 22 23 24 *Frailty index*

25 Following William et al. [23], we derived the frailty index using 49 functional, psychological,  
26 and social deficits within the range of data variables in the UK Biobank (see Supplementary  
27 Table 1). We coded the binary variables as 0 or 1, and for ordinal and continuous variables,  
28 coding was based on distribution. The total number of deficits was summed and divided by  
29 total possible deficits to create a frailty index between 0 and 1, where higher scores indicated  
30 greater frailty.  
31  
32

### 33 34 35 36 37 38 39 *Covariates*

40 We included demographic and health behaviour as covariates. Demographic information  
41 included age (in years; Data-Field 21003), gender (with male as the reference; Data-Field 31),  
42 and ethnicity (other than Caucasian as the reference or Caucasian; Data-Field 21000). Health  
43 behaviours included physical activity, alcohol intake and smoking status. Physical activity  
44 was measured as the number of days per week respondents engaged in at least 10 minutes of  
45 moderate or vigorous physical activity (Data-Field 884, Data-Field 904). Respondents were  
46 classified as non-current smokers (reference) or current smokers (Data-Field 20116). Alcohol  
47  
48  
49  
50  
51  
52  
53  
54  
55  
56  
57  
58  
59  
60

1  
2  
3 intake status was classified as non-current (reference) or current alcohol drinking (Data-Field  
4  
5 20117).

### 8 **Statistical Analyses**

9  
10 Descriptive statistics were used to summarise subject characteristics including means and  
11  
12 standard deviation for continuous variables and frequencies and percentages for categorical  
13  
14 variables. We looked at the associations between frailty index and both early life factors and  
15  
16 other covariates using unpaired t-tests (dichotomous variables), ANOVA (categorical  
17  
18 variables), and Pearson's correlation (continuous variables).

19  
20 We first performed a multivariate regression model including early life factors, education, and  
21  
22 covariates (age, gender, ethnicity, smoking, alcohol drinking, physical activity). We further  
23  
24 handled missing data using multivariate imputation by chained equations (MICE) [24] (using  
25  
26 Stata's mi program) [25]. Twenty imputations were used.

27  
28 The structural equation model (SEM) has been widely used to investigate complex  
29  
30 relationships between variables in epidemiological studies [26]. SEM can be used to resolve  
31  
32 the endogeneity problem between variables and to explore direct, indirect, and total effects  
33  
34 between exogenous and endogenous variables. It can jointly test a variety of hypotheses that  
35  
36 involve different types of complicated cause-effect relationships. However, all responses are  
37  
38 assumed to be continuous, even when a variable is binary or categorical. In our analysis we  
39  
40 include binary (education). To address this, we used a generalised structural equation model  
41  
42 (GSEM) to identify the link between early life factors and frailty index and the mediating  
43  
44 effect of education and income on that relationship. A GSEM combines generalised linear  
45  
46 model (GLM) estimation and SEM modelling estimation; it can accommodate binary, ordinal,  
47  
48 counted and categorical data [27]. Using maximum likelihood estimators, GLM estimators  
49  
50 are based on a density function, allowing the direct use of all types of data [28]. The analyses  
51  
52 were performed using MPlus version 8. We examined education as mediators of the  
53  
54  
55  
56  
57  
58  
59  
60



relationship in the GSEM model, which were controlled for age, gender, ethnicity and health behaviours (Model fit information: Chi-square=5049.35, p value=0.00; RMSEA=0.06, CFI=0.82; WRMR=13.01).

### Patient and public involvement

Patients and/or the public were not involved in this study.

### Results

#### Subjects

The study sample consisted of 502,489 respondents with an average age of 56.53 years (standard deviation [SD]=8.10 years) (Table 1). Just under half (45%) of the respondents were male, and most were Caucasian (94.59%). Around one-third of the respondents had graduated from college or university. The proportion of respondents whose mothers smoked regularly around the time of their birth was 29%. More than 72% of respondents were breastfed as babies, and 0.18% had perinatal diseases. 10% of respondents had low birth weight, while 13% of them had high birth weight. 91% of the respondents were born in the UK. Just over two-thirds of subjects reported engaging in at least 10 minutes of moderate or vigorous physical activity at least three days per week; 92% consumed alcohol and 11% were current smokers.

**Table 1.** Subject characteristics (n=502,489)

| Variable                         | Percentage or mean (SD)* | Mean (SD) of frailty index** | Bivariate association with frailty index*** |
|----------------------------------|--------------------------|------------------------------|---------------------------------------------|
| Frailty index, mean (SD)         | 0.14(0.08)               |                              |                                             |
| <i>Early-life factors</i>        |                          |                              |                                             |
| Maternal smoking around birth, % |                          |                              | p<0.0001                                    |
| No                               | 70.75%                   | 0.133(0.073)                 |                                             |
| Yes                              | 29.25%                   | 0.146(0.078)                 |                                             |
| Breastfed as a baby, %           |                          |                              | p<0.0001                                    |
| No                               | 27.65%                   | 0.137(0.076)                 |                                             |

|    |                                           |             |               |                  |
|----|-------------------------------------------|-------------|---------------|------------------|
| 1  |                                           |             |               |                  |
| 2  |                                           |             |               |                  |
| 3  | Yes                                       | 72.35%      | 0.134(0.074)  |                  |
| 4  | Birthweight, %                            |             |               | p<0.0001         |
| 5  | Low birth weight                          | 10.26%      | 0.149(0.080)  |                  |
| 6  | Normal birth weight                       | 76.34%      | 0.131(0.073)  |                  |
| 7  | High birth weight                         | 13.40%      | 0.136(0.076)  |                  |
| 8  | Birth month, %                            |             |               | p=0.0002         |
| 9  | January                                   | 8.44%       | 0.138(0.076)  |                  |
| 10 | February                                  | 7.96%       | 0.137(0.075)  |                  |
| 11 | March                                     | 8.98%       | 0.138(0.075)  |                  |
| 12 | April                                     | 8.59%       | 0.139(0.076)  |                  |
| 13 | May                                       | 8.98%       | 0.138(0.076)  |                  |
| 14 | June                                      | 8.45%       | 0.139(0.076)  |                  |
| 15 | July                                      | 8.48%       | 0.139(0.076)  |                  |
| 16 | August                                    | 8.24%       | 0.138(0.076)  |                  |
| 17 | September                                 | 8.14%       | 0.138(0.075)  |                  |
| 18 | October                                   | 8.06%       | 0.137(0.076)  |                  |
| 19 | November                                  | 7.63%       | 0.137(0.075)  |                  |
| 20 | December                                  | 8.03%       | 0.138(0.076)  |                  |
| 21 | Perinatal diseases, %                     |             |               | p<0.0001         |
| 22 | No                                        | 99.82%      | 0.138(0.075)  |                  |
| 23 | Yes                                       | 0.18%       | 0.149(0.084)  |                  |
| 24 | Born in the UK, %                         |             |               | p=0.0381         |
| 25 | No                                        | 8.96%       | 0.137(0.076)  |                  |
| 26 | Yes                                       | 91.04%      | 0.138(0.075)  |                  |
| 27 | <i>Sociodemographics</i>                  |             |               |                  |
| 28 | Age (years), mean (SD)                    | 56.53(8.10) |               | R=0.16, p<0.0001 |
| 29 | Gender, %                                 |             |               | p<0.0001         |
| 30 | Female                                    | 54.40%      | 0.141(0.075)  |                  |
| 31 | Male                                      | 45.60%      | 0.134(0.076)  |                  |
| 32 | Ethnicity, %                              |             |               | p<0.0001         |
| 33 | Other                                     | 5.41%       | 0.141(0.078)  |                  |
| 34 | Caucasian                                 | 94.59%      | 0.138(0.075)  |                  |
| 35 | Education, %                              |             |               | p<0.0001         |
| 36 | Less than college                         | 67.27%      | 0.145(0.077)  |                  |
| 37 | College or university degree              | 32.73%      | 0.122 (0.069) |                  |
| 38 | <i>Health behaviours</i>                  |             |               |                  |
| 39 | Moderate or vigorous physical activity, % |             |               | p<0.0001         |
| 40 | None                                      | 10.75%      | 0.160(0.085)  |                  |
| 41 | 1 day                                     | 7.11%       | 0.134(0.072)  |                  |
| 42 | 2 days                                    | 13.40%      | 0.133(0.072)  |                  |
| 43 | 3 days or more                            | 68.75%      | 0.135(0.073)  |                  |
| 44 | Current alcohol consumption, %            |             |               | p<0.0001         |
| 45 | No                                        | 8.08%       | 0.166(0.088)  |                  |
| 46 | Yes                                       | 91.92%      | 0.135(0.074)  |                  |
| 47 | Current smoking, %                        |             |               | p<0.0001         |
| 48 | No                                        | 89.39%      | 0.135(0.074)  |                  |
| 49 | Yes                                       | 10.61%      | 0.159(0.084)  |                  |
| 50 |                                           |             |               |                  |
| 51 |                                           |             |               |                  |
| 52 |                                           |             |               |                  |
| 53 |                                           |             |               |                  |
| 54 |                                           |             |               |                  |
| 55 |                                           |             |               |                  |
| 56 |                                           |             |               |                  |
| 57 |                                           |             |               |                  |
| 58 |                                           |             |               |                  |
| 59 |                                           |             |               |                  |
| 60 |                                           |             |               |                  |

1  
2  
3 **Note:** \* Presented are means (standard deviation) for continuous variables and percentages  
4 for categorical variables. The maternal smoking variable includes 13.86% missing data, the  
5 breastfed as a baby variable includes 23.64% missing data, the birthweight variable includes  
6 44.88% missing data, the education variable includes 2.02% missing data, and the moderate  
7 or vigorous physical activity variable includes 2.43% missing data. \*\* Presented are the  
8 means (standard deviation) of the frailty index per group. \*\*\* Bivariate analyses are unpaired  
9 t-tests for binary variables, ANOVA for ordinal variables, and Pearson's correlation for  
10 continuous variables.  
11  
12  
13  
14  
15

### 16 *Early life factors, covariates and frailty index*

17  
18 In bivariate analyses, compared to those whose mothers did not smoke around birth, maternal  
19 pre- and post-natal smoking was associated with a significantly higher frailty index (0.146 vs  
20 0.133) as was the presence of perinatal diseases (0.149 vs 0.138) and being born in the UK  
21 (0.138 vs 0.137). A history of breast feeding was associated with a lower frailty index (0.134  
22 vs 0.137). Low (0.149 vs 0.131) and high (0.136 vs 0.138) birthweight were associated with  
23 higher frailty scores compared to normal birthweight. Shorter daylight hours at birth ( $r=-0.01$ )  
24 were associated with lower frailty indices. As expected, the frailty index was higher among  
25 women than among men and in those with lower educational attainment. The frailty index  
26 was also higher in smokers, non-drinkers and those who engaged in less physical activity.  
27  
28  
29  
30  
31  
32  
33  
34  
35  
36  
37  
38

39 In regression analyses the effects of early life factors and covariates on the frailty index  
40 appeared similar in terms of both magnitude and direction when using both non-imputed and  
41 imputed data (see Supplementary Table 2). In these multivariate regression analyses adjusting  
42 for age, gender and health behaviours, birth month with longer hours of daylight, having a  
43 low and high birthweight, maternal smoking, being breastfed as baby, perinatal diseases and  
44 born in the UK had positive and significant associations with frailty index.  
45  
46  
47  
48  
49  
50  
51  
52

### 53 *Mediation analysis*

54  
55 In the GSEM model, education mediated the association between early life factors and frailty  
56 index among middle-aged and older adults, supporting the pathway hypothesis. Table 2  
57 presents the total, direct and indirect effects for each of the early life factors on the frailty  
58  
59  
60

index. Maternal smoking (direct effect: coef.=0.068, z=33.40; indirect effect: coef.=0.011, z=25.54) and low birthweight (direct effect: coef.=0.041, z=20.93; indirect effect: coef.=0.003, z=9.18) and high birthweight (direct effect: coef.=0.013, z=6.34; indirect effect: coef.=0.001, z=4.09) directly and indirectly affected the frailty index compared to normal birthweight. The direct and indirect effects of being breastfed as a baby on having a lower frailty index were -0.022 (z=-10.36) and -0.009 (z=-22.91). Perinatal diseases had significant direct effect on higher frailty index (coef.=0.007, z=3.83), but it had no indirect effect on the frailty index (coef.=0.000, z=0.27). Being born in the UK, differently, had a significant indirect effect on higher frailty index (coef.=0.016, z=31.24), but it had no direct effect on the frailty index (coef.=0.002, z=0.74). Birth months with a short daylength were directly (coef.=-0.006, z=-2.91) and indirectly (coef.=-0.001, p-value=-2.35) associated with lower frailty scores.

**Table 2.** Total, direct, and indirect effects of early life factors on frailty index

|                               | <b>Total effects</b> | <b>Direct effects</b> | <b>Indirect effects</b> |
|-------------------------------|----------------------|-----------------------|-------------------------|
| Breastfed as a baby           | -0.031 (0.002)†      | -0.022 (0.002)†       | -0.009 (0.000)†         |
| Maternal smoking around birth | 0.079 (0.002)†       | 0.068 (0.002)†        | 0.011 (0.000)†          |
| Low birth weight              | 0.045 (0.002)†       | 0.041 (0.002)†        | 0.003 (0.000)†          |
| High birth weight             | 0.015 (0.002)†       | 0.013 (0.002)†        | 0.001 (0.000)†          |
| Birth month (cos)             | -0.007 (0.002)*      | -0.006 (0.002)*       | -0.001 (0.000)*         |
| Perinatal diseases            | 0.007 (0.002)†       | 0.007 (0.002)†        | 0.000 (0.000)           |
| Born in the UK                | 0.018 (0.002)†       | 0.002 (0.002)         | 0.016 (0.001)†          |

Education mediated the links between early life factors and frailty index (Figure 2). Participants born in the UK had a lower probability of completing higher education (coef.=-0.130, z=-44.65). Having been breastfed as a baby (coef.=0.076, z=26.87) was associated with higher educational attainment, while maternal smoking was associated with lower educational attainment (coef.=-0.087, z=-31.41). Both low (coef.=-0.027, z=-9.39) and high birthweight (coef.=-0.011, z=-4.11) was related to lower education attainment compared to normal

1  
2  
3 birthweight. Birth months with short daylight was related to higher education with the lowest  
4 effect size (coef.=0.006, z=2.35). Higher education was also associated with a lower frailty  
5 index (coef.=-0.123, z=-44.30). Amongst covariates with greater effect sizes, older age  
6 (coef.=0.178, z=83.25), lower activity levels (coef.=-0.088, z=-45.61) and smoking  
7 (coef.=0.106, z=56.36) were associated with a higher frailty index. Drinking alcohol is related  
8 to lower frailty index (coef.=-0.093; z=-51.63).  
9  
10  
11  
12  
13  
14  
15

## 16 **Discussions**

17  
18 Using data from UK Biobank we found that a history of breastfeeding was associated with a  
19 lower frailty index, while maternal smoking, having low or high birth weight, perinatal  
20 diseases and birth month with longer day length were associated with a higher frailty index.  
21  
22 This study provides the first evidence that educational attainment level mediates the  
23 association between early life factors and frailty index.  
24  
25

26  
27 Early life factors have previously been linked with higher frailty and chronic disease risk later  
28 in life [29,30]. Our findings highlight the importance of early life factors in determining frailty  
29 in middle age and older individuals. Maternal smoking was directly associated with higher  
30 frailty compared to those who were not exposed to maternal smoking. Evidence has suggested  
31 that cigarette smoke exposure in utero is linked to the development of chronic diseases later  
32 in life, including type 2 diabetes, obesity, certain cancers and respiratory disorders [13]. We  
33 also showed that this association was mediated by educational attainment. This is in line with  
34 a previous study which reported lower academic achievements of adolescents whose mothers  
35 smoked during pregnancy [31]. Maternal smoking during pregnancy was also found to be  
36 correlated with the children's cognitive function [32].  
37  
38  
39  
40  
41  
42  
43  
44  
45  
46  
47  
48  
49  
50  
51  
52

53  
54 There is some evidence of a link between early life factors and occurrence of frailty. In a  
55 recent study in Finland, greater weight, length and BMI at birth were associated with a lower  
56 risk of frailty later in life [17]. In our study, having low or high birth weight were associated  
57  
58  
59  
60

1  
2  
3 with higher frailty index compared to having a normal birthweight, both directly and  
4 indirectly through education. Bleker and colleagues found that prenatal undernutrition was  
5 not associated with frailty but was associated with poorer health in old age, including slower  
6 gait speed and lower physical functioning which are components of the frailty phenotype, and  
7 the findings remained significant after inclusion of an extensive set of control variables  
8 including adult socioeconomic status [18]. Low birth weight is associated with increased risk  
9 of age-related diseases in prior review, and insulin-like growth factor (IGF-1) is the key driver  
10 of this process [33]. High birth weight may be the results of maternal obesity [34] and a study  
11 in Finland found that being born large for gestational age at term was associated with thicker  
12 carotid intima medial as the marker of subclinical atherosclerosis [35]. We also found that  
13 individuals who reported that they were breastfed have a lower frailty score. Infants  
14 exclusively breastfed have been found to have a lower risk of obesity, type 2 diabetes and  
15 high blood pressure in adulthood [14].

16  
17 Birth month is associated with lower frailty index scores with a limited effect size in our study.  
18  
19 In a large study in the US with 1,749,400 individuals showed that spring summer-born  
20 individuals have a relatively higher cardiovascular disease risk than autumn-winter born  
21 individuals and these seasons coincide with lower life expectancy [36]. This study showed  
22 that not only cardiovascular diseases, but several chronic diseases were associated with season  
23 of birth, having a different seasonal pattern. The underlying mechanisms may differ for each  
24 of these associations, such as sensitization to allergens or vitamin D deficiency [36]. Another  
25 possible mechanism is that differential light exposure during perinatal period influences  
26 development of the biological clock, in turn influencing later-life circadian rhythms and the  
27 sleep system, which are essential for health [37]. In European countries, it was shown that  
28 spring/summer born participants compared to autumn had higher frailty scores but this effect  
29 seemed independent of education [38]. However, we found an indirect effect of season of  
30  
31  
32  
33  
34  
35  
36  
37  
38  
39  
40  
41  
42  
43  
44  
45  
46  
47  
48  
49  
50  
51  
52  
53  
54  
55  
56  
57  
58  
59  
60

1  
2  
3 birth through education. The indirect relationship of season of birth and frailty may be due to  
4 social factors such as the UK September date cut-off for starting education, which is in line  
5 with our findings showing an association between winter-born individuals and higher  
6 educational attainment [39,40].  
7  
8  
9

10  
11  
12 Our results further suggest that having a perinatal disease was associated directly with higher  
13 frailty index scores. This finding is in keeping with that new-borns' perinatal complications  
14 are related to accelerated ageing at midlife [16]. Being born in the UK affected the frailty  
15 index indirectly through education, but not directly. Respondents who were not born in the  
16 UK were likely to have higher education attainment, which may enable better maintenance of  
17 health during older ages. However, we should note that our sample in this analysis may not  
18 be representative of the general population, and that participants were categorised as being  
19 born outside the UK without taking into account the country of origin and their socioeconomic  
20 background. In our analysis, we observed that education levels mediate the link between the  
21 other early life factors and the frailty index. Early life factors have a significant relationship  
22 with educational attainment, and higher education attainment is linked to a lower frailty index.  
23 This result is broadly in keeping with a prior study in Sweden which found that the  
24 associations between childhood conditions and various old age health indicators  
25 (musculoskeletal disorders, cardiovascular disease, self-rated health and impaired mobility)  
26 are mediated by education [41]. Prior research on the biological and psychological pathways  
27 linked childhood health and socioeconomic conditions to self-reported health status among  
28 older adults in 15 European countries [19]. Prior studies have shown that the life-course  
29 trajectories of socioeconomic attainment could be altered by physical and social conditions  
30 [42], and both childhood and adult conditions may impact health decades later [43]. Our  
31 findings have potential implications for policies aiming at preventing frailty among older  
32 adults. Subsequent circumstances mediate the impact of early life factors on frailty later in  
33  
34  
35  
36  
37  
38  
39  
40  
41  
42  
43  
44  
45  
46  
47  
48  
49  
50  
51  
52  
53  
54  
55  
56  
57  
58  
59  
60

1  
2  
3 life, and our study suggests that interventions such as improving education in midlife may  
4  
5 mitigate early life disadvantages.  
6

7  
8 Our findings are based on a large and well characterised cohort. There are, however, a number  
9  
10 of limitations to be consider in interpreting the results. First, information concerning early life  
11  
12 factors in this study was based on self-report and is therefore subject to recall error. The likely  
13  
14 effect of such error would be to underestimate the relationship between these factors and the  
15  
16 frailty index. Second, we have limited access to the health conditions of the parents. A broad  
17  
18 range of conditions which are comprised in the frailty index bear a hereditary risk, thus taking  
19  
20 into account the health conditions of the parents is important in assessing the independent  
21  
22 associations with frailty. Future studies may include the health conditions of the parents as  
23  
24 the covariates. Third, the information on breast feeding duration is unavailable. Breast feeding  
25  
26 for weeks rather than months may confer different outcomes. A dose response relationship  
27  
28 thus cannot be assessed. Finally, these data were based on a sample of predominantly  
29  
30 Caucasian men and women and should be extrapolated beyond this group with caution [44].  
31  
32  
33

34  
35 In conclusion, this study indicates an association between early life factors and frailty later in  
36  
37 life. Early life conditions are important as the start of a mediated, incremental process during  
38  
39 the life course. A comprehensive understanding of the determinants of frailty among middle-  
40  
41 aged and older adults requires attention to exposures throughout the entire life course, with a  
42  
43 special focus on the in utero and infancy stages and the chains of associated socioeconomic  
44  
45 conditions that that connect over the life course. Applying a life course perspective to health  
46  
47 in adulthood and old age should have implications for public health interventions, social  
48  
49 policy, and further research. Early life is not the only period for any potential successful  
50  
51 intervention; as our findings show, early life disadvantages may be offset by education and  
52  
53 material wealth. Interventions throughout the life course, and especially during early life,  
54  
55 could substantially reduce the health burden later in life.  
56  
57  
58  
59  
60



### **Contributorship statement**

A.D and A.M performed the data analysis. A.D and A.M drafted the manuscript. N.P, T.W.O, M.M.C., A.P. and were involved in planning and supervised the work. All authors discussed the results and commented on the manuscript.

### **Competing interest**

All authors declare no conflicts of interest.

### **Funding**

Altug Didikoglu was supported by a grant from the Republic of Turkey Ministry of National Education.

### **Data sharing statement**

Data are available in a public, open access repository. Other researchers can apply for UK Biobank data to answer specific research questions.

### **Ethics Approval**

This study was conducted as part of UK Biobank Project Number 41877 and is covered by the generic ethics approval for UK Biobank studies from the NHS National Research Ethics Service (16/NW/0274).

## References

1. United Nations. World Population Prospects 2019: Highlights. New York: Department of Economic and Social Affairs; 2019. Contract No.: (ST/ESA/SER.A/423).
2. Prince MJ, Wu F, Guo Y, et al. The burden of disease in older people and implications for health policy and practice. *Lancet*. 2015;385:549-562.
3. Sternberg SA, Schwartz AW, Karunanathan S, Bergman H, Clarfield MA. The identification of frailty: a systematic literature review. *J Am Geriatr Soc*. 2011;59:2129-2138.
4. Daniels R, van Rossum E, de Witte L, Kempen GI, van den Heuvel W. Interventions to prevent disability in frail community-dwelling elderly: a systematic review. *BMC Health Serv Res*. 2008;8:278.
5. Hogan DB. Models, definitions, and criteria for frailty. *Conn's Handbook of Models for Human Aging*. 2018:35-44.
6. Rockwood K, Mitnitski A. Frailty defined by deficit accumulation and geriatric medicine defined by frailty. *Clin Geriatr Med*. 2011;27:17-26.
7. O'Caoimh R, Sezgin D, O'Donovan MR, et al. Prevalence of frailty in 62 countries across the world: a systematic review and meta-analysis of population-level studies. *Age and Ageing*. 2021;50:96-104.
8. Hanlon P, Nicholl BI, Jani BD, Lee D, McQueenie R, Mair FS. Frailty and prefrailty in middle-aged and older adults and its association with multimorbidity and mortality: a prospective analysis of 493 737 UK Biobank participants. *Lancet Public Health*. 2018;3:e323-e332.
9. Cegri F, Orfila F, Abellana RM, Pastor-Valero M. The Impact of Frailty on Admission to Home Care Services And Nursing Homes: Eight-Year Follow-Up of A Community-Dwelling, Older Adult, Spanish Cohort. *BMC Geriatrics*. 2020;20:1-13.
10. Ensrud KE, Ewing SK, Taylor BC, et al. Frailty and risk of falls, fracture, and mortality in older women: the study of osteoporotic fractures. *J Gerontol A Biol Sci Med Sci*. 2007;62:744-51.
11. Barker DJ. Fetal origins of coronary heart disease. *BMJ*. 1995;311:171-4.
12. Eriksson JG. Developmental origins of health and disease—from a small body size at birth to epigenetics. *Ann Med*. 2016;48:456-467.

13. Doherty S, Grabowski J, Hoffman C, Ng S, Zelikoff J. Early life insult from cigarette smoke may be predictive of chronic diseases later in life. *Biomarkers*. 2009;14(sup1):97-101.
14. Horta BL, Loret de Mola C, Victora CG. Long-term consequences of breastfeeding on cholesterol, obesity, systolic blood pressure and type 2 diabetes: a systematic review and meta-analysis. *Acta Paediatr*. 2015;104:30-7.
15. Zhang Y, Devore EE, Strohmaier S, Grodstein F, Schernhammer ES. Birth month, birth season, and overall and cardiovascular disease mortality in US women: prospective cohort study. *BMJ*. 2019;367.
16. Shalev I, Caspi A, Ambler A, et al. Perinatal complications and aging indicators by midlife. *Pediatrics*. 2014;134:e1315-e23.
17. Haapanen M, Perälä M, Salonen M, et al. Early life determinants of frailty in old age: the Helsinki Birth Cohort Study. *Age and Ageing*. 2018;47:569-75.
18. Bleker LS, de Rooij SR, Painter RC, van der Velde N, Roseboom TJ. Prenatal undernutrition and physical function and frailty at the age of 68 years: the Dutch Famine Birth Cohort Study. *J Gerontol A Biol Sci Med Sci*. 2016;71:1306-14.
19. Pakpahan E, Hoffmann R, Kröger H. The long arm of childhood circumstances on health in old age: Evidence from SHARELIFE. *Advances in Life Course Research*. 2017;31:1-10.
20. Power C, Hertzman C. Social and biological pathways linking early life and adult disease. *Br Med Bull*. 1997;53(1):210-21.
21. Sudlow C, Gallacher J, Allen N, Beral V, Burton P, Danesh J, et al. UK biobank: an open access resource for identifying the causes of a wide range of complex diseases of middle and old age. *PLoS Medicine*. 2015;12(3):e1001779.
22. Didikoglu A, Maharani A, Pendleton N, Canal MM, Payton A. Early life factors and COVID-19 infection in England: A prospective analysis of UK Biobank participants. *Early Human Development*. 2021;155:105326.
23. Williams DM, Jylhävä J, Pedersen NL, Hägg S. A frailty index for UK Biobank participants. *J Gerontol A Biol Sci Med Sci*. 2019;74(4):582-7.
24. Azur MJ, Stuart EA, Frangakis C, Leaf PJ. Multiple imputation by chained equations: what is it and how does it work? *International Journal of Methods in Psychiatric Research*. 2011;20(1):40-9.
25. StataCorp. Stata Multiple-Imputation Reference Manual Release 17. College Station, TX: StataCorp LLC; 2021.

- 1  
2  
3  
4  
5  
6  
7  
8  
9  
10  
11  
12  
13  
14  
15  
16  
17  
18  
19  
20  
21  
22  
23  
24  
25  
26  
27  
28  
29  
30  
31  
32  
33  
34  
35  
36  
37  
38  
39  
40  
41  
42  
43  
44  
45  
46  
47  
48  
49  
50  
51  
52  
53  
54  
55  
56  
57  
58  
59  
60
26. Amorim LDAF, Fiaccone RL, Santos CAS, Santos TNd, de Moraes LTL, Oliveira NF, et al. Structural Equation Modeling in Epidemiology. *Cad Saúde Pública*. 2010;26(12):2251-62.
  27. Zhang L, Zhang J. Perception of small tourism enterprises in Lao PDR regarding social sustainability under the influence of social network. *Tourism Management*. 2018;69:109-20.
  28. McCullagh P, Nelder JA. *Generalized Linear Models*: Routledge; 2019.
  29. Michels KB. Early life predictors of chronic disease. *J Womens Health*. 2003;12(2):157-61.
  30. Li Y, Xue Q-L, Odden MC, Chen X, Wu C. Linking early life risk factors to frailty in old age: evidence from the China Health and Retirement Longitudinal Study. *Age and Ageing*. 2020;49(2):208-17.
  31. Kristjansson AL, Thomas S, Lilly CL, Thorisdottir IE, Allegrante JP, Sigfusdottir ID. Maternal smoking during pregnancy and academic achievement of offspring over time: a registry data-based cohort study. *Preventive Medicine*. 2018;113:74-9.
  32. Julvez J, Ribas-Fitó N, Torrent M, Fornes M, Garcia-Esteban R, Sunyer J. Maternal smoking habits and cognitive development of children at age 4 years in a population-based birth cohort. *International Journal of Epidemiology*. 2007;36(4):825-32.
  33. Vaiserman AM. Birth weight predicts aging trajectory: A hypothesis. *Mechanisms of Ageing and Development*. 2018;173:61-70.
  34. Hanson M, Cooper C, Aihie Sayer A, Eendebak R, Clough G, Beard J. Developmental aspects of a life course approach to healthy ageing. *The Journal of Physiology*. 2016;594(8):2147-60.
  35. Skilton MR, Viikari JS, Juonala M, Laitinen T, Lehtimäki T, Taittonen L, et al. Fetal growth and preterm birth influence cardiovascular risk factors and arterial health in young adults: the Cardiovascular Risk in Young Finns Study. *Arteriosclerosis, Thrombosis, and Vascular Biology*. 2011;31(12):2975-81.
  36. Boland MR, Shahn Z, Madigan D, Hripacsak G, Tatonetti NP. Birth month affects lifetime disease risk: a phenome-wide method. *Journal of the American Medical Informatics Association*. 2015;22(5):1042-53.
  37. Didikoglu A, Nair N, Robinson AC, Roncaroli F, Pendleton N, Payton A, et al. The effect of season of birth on brain epigenome-wide DNA methylation of older adults. *Journal of Developmental Origins of Health and Disease*. 2022;13(3):367-77.

- 1  
2  
3 38. Abeliansky AL, Strulik H. Season of birth, health and aging. *Economics & Human*  
4 *Biology*. 2020;36:100812.  
5  
6 39. Verachtert P, De Fraine B, Onghena P, Ghesquière P. Season of birth and school  
7 success in the early years of primary education. *Oxford Review of Education*.  
8 2010;36(3):285-306.  
9  
10 40. Department of Education. Month of Birth and Education. Schools Analysis and  
11 Research Division. 2010. Contract No.: Research Report DFE-RR017.  
12  
13 41. Berndt H, Fors S. Childhood living conditions, education and health among the  
14 oldest old in Sweden. *Ageing & Society*. 2016;36(3):631-48.  
15  
16 42. Haas SA, Glymour MM, Berkman LF. Childhood health and labor market inequality  
17 over the life course. *Journal of Health and Social Behavior*. 2011;52(3):298-313.  
18  
19 43. Montez JK, Hayward MD. *Early life conditions and later life mortality*.  
20 International Handbook of Adult Mortality: Springer; 2011. p. 187-206.  
21  
22 44. Fry A, Littlejohns TJ, Sudlow C, Doherty N, Adamska L, Sprosen T, et al.  
23 Comparison of sociodemographic and health-related characteristics of UK Biobank  
24 participants with those of the general population. *American Journal of*  
25 *Epidemiology*. 2017;186(9):1026-34.  
26  
27  
28  
29  
30  
31  
32  
33  
34  
35  
36  
37  
38  
39  
40  
41  
42  
43  
44  
45  
46  
47  
48  
49  
50  
51  
52  
53  
54  
55  
56  
57  
58  
59  
60

1  
2  
3 **List of the figures and tables**  
4

5 **Figure 1** The pathways of early life factors and impact on frailty among adults  
6

7 **Figure 2** Generalised structural equation models to identify the association between early  
8 life factors and frailty index, and education as mediators of the relationship between early  
9 life factors and frailty index. Note: \*Significant at 0.05; † Significant at 0.0001  
10  
11  
12  
13

14 **Table 1** Subject characteristics  
15

16 **Table 2** Total, direct, and indirect effects of early life factors on frailty index  
17  
18  
19  
20  
21  
22  
23  
24  
25  
26  
27  
28  
29  
30  
31  
32  
33  
34  
35  
36  
37  
38  
39  
40  
41  
42  
43  
44  
45  
46  
47  
48  
49  
50  
51  
52  
53  
54  
55  
56  
57  
58  
59  
60

1  
2  
3  
4  
5  
6  
7  
8  
9  
10  
11  
12  
13  
14  
15  
16  
17  
18  
19  
20  
21  
22  
23  
24  
25  
26  
27  
28  
29  
30  
31  
32  
33  
34  
35  
36  
37  
38  
39  
40  
41  
42  
43  
44  
45  
46  
47  
48  
49  
50  
51  
52  
53  
54  
55  
56  
57  
58  
59  
60

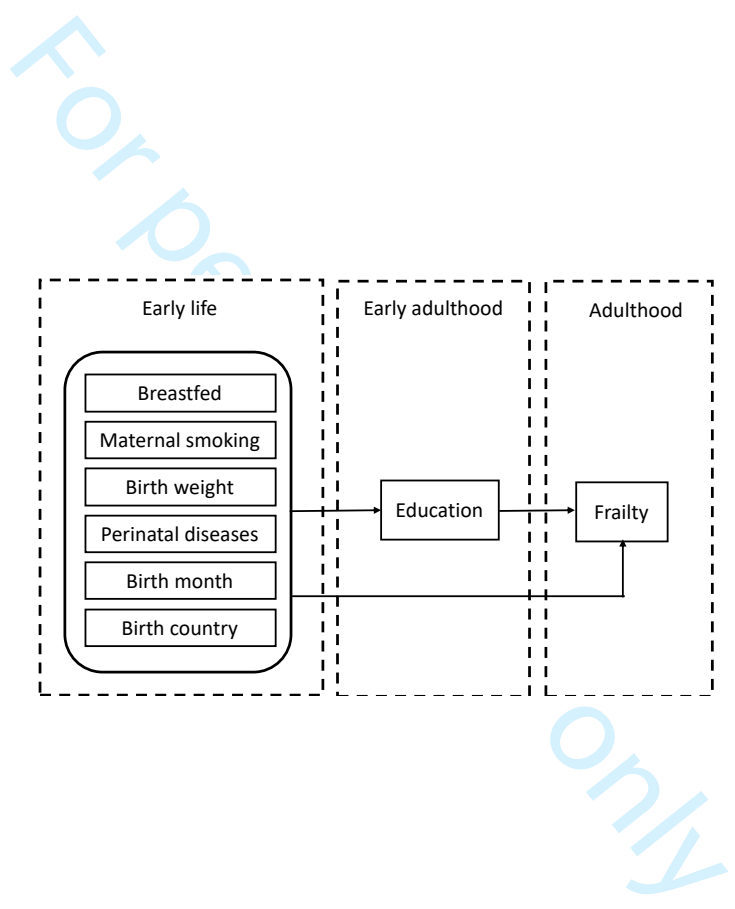

Breastfed as a baby

Maternal smoking

Low birthweight

High birthweight

Perinatal diseases

Birth month

Born in the UK

0.076†

-0.087†

-0.027†

-0.011†

-0.001

0.006\*

-0.130†

1  
2  
3  
4  
5  
6  
7  
8

Education

-0.022†

0.068†

0.041†

0.013†

0.007†

-0.006\*

0.002

-0.123†

Frailty index



## Supplementary Material: Pathways linking early life factors and frailty among middle-aged and older adults in England: Findings from UK Biobank

**Supplementary Table 1.** Variables included in the UK Biobank frailty indices

| Item | Variable                                  | Definition                                                                                                                      | Coding                                                                  |
|------|-------------------------------------------|---------------------------------------------------------------------------------------------------------------------------------|-------------------------------------------------------------------------|
|      | Sensory                                   |                                                                                                                                 |                                                                         |
| 1    | Glaucoma                                  | Self-report of physician-diagnosed glaucoma                                                                                     | 0=no; 1=yes                                                             |
| 2    | Cataracts                                 | Self-report of physician-diagnosed glaucoma                                                                                     | 0=no; 1=yes                                                             |
| 3    | Hearing difficulty                        | Self-report experiencing hearing difficulty                                                                                     | 0=no; 1=yes/completely deaf                                             |
|      | Cranial                                   |                                                                                                                                 |                                                                         |
| 4    | Migraine                                  | Self-report of physician-diagnosed migraine                                                                                     | 0=no; 1=yes                                                             |
| 5    | Dental problems                           | Self-report of physician-diagnosed dental problems, i.e., ulcers, painful gums, bleeding gums, loose teeth, toothache, dentures | 0=none; 1=any                                                           |
|      | Mental well-being                         |                                                                                                                                 |                                                                         |
| 6    | Self-rated health                         | Self-rated health in 4 Likert scale                                                                                             | 0=excellent; 0.25=good; 0.5=fair; 1=poor                                |
| 7    | Fatigue                                   | Self-report of frequency of tiredness / lethargy in last two weeks                                                              | 0=not at all; 0.25=several days; 0.5=more than half; 1=nearly every day |
| 8    | Sleep                                     | Self-report experiencing of sleeplessness/ insomnia                                                                             | 0=never/rarely; 0.5=sometimes; 1=usually                                |
| 9    | Depressed feelings                        | Self-report of frequency having depressed feeling in last two weeks                                                             | 0=not at all; 0.5=several days; 0.75=more than half; 1=nearly every day |
| 10   | Self-described nervous personality        | Self-report of having nervous personality                                                                                       | 0=no; 1=yes                                                             |
| 11   | Severe anxiety/ panic attacks             | Self-report of physician-diagnosed severe anxiety/panic attacks                                                                 | 0=no; 1=yes                                                             |
| 12   | Common to feel loneliness                 | Self-report of feeling lonely commonly                                                                                          | 0=no; 1=yes                                                             |
| 13   | Sense of misery (ever/never)              | Self-report of ever having sense of misery                                                                                      | 0=no; 1=yes                                                             |
|      | Infirmity                                 |                                                                                                                                 |                                                                         |
| 14   | Infirmity                                 | Self-report of having long-standing illness or disability                                                                       | 0=no; 1=yes                                                             |
| 15   | Falls in last year                        | Self-report of experiencing falls last year                                                                                     | 0=no falls; 0.5=one fall; 1=more than one fall                          |
| 16   | Fractures/broken bones in last five years | Self-report of experiencing fractures/broken bones in last five years                                                           | 0=no; 1=yes                                                             |
|      | Cardiometabolic                           |                                                                                                                                 |                                                                         |
| 17   | Diabetes                                  | Self-report of physician-diagnosed diabetes                                                                                     | 0=no; 1=yes                                                             |
| 18   | Myocardial infarction                     | Self-report of physician-diagnosed myocardial infarction                                                                        | 0=no; 1=yes                                                             |
| 19   | Angina                                    | Self-report of physician-diagnosed angina                                                                                       | 0=no; 1=yes                                                             |
| 20   | Stroke                                    | Self-report of physician-diagnosed stroke                                                                                       | 0=no; 1=yes                                                             |
| 21   | High blood pressure                       | Self-report of physician-diagnosed high blood pressure                                                                          | 0=no; 1=yes                                                             |
| 22   | Hypothyroidism                            | Self-report of physician-diagnosed hypothyroidism                                                                               | 0=no; 1=yes                                                             |
| 23   | Deep-vein thrombosis                      | Self-report of physician-diagnosed deep-vein thrombosis                                                                         | 0=no; 1=yes                                                             |
| 24   | High cholesterol                          | Self-report of physician-diagnosed high cholesterol                                                                             | 0=no; 1=yes                                                             |

|    |                                              |                                                                           |                                                 |
|----|----------------------------------------------|---------------------------------------------------------------------------|-------------------------------------------------|
|    | Respiratory                                  |                                                                           |                                                 |
| 25 | Breathing                                    | Self-report of having wheeze in last year                                 | 0=no; 1=yes                                     |
| 26 | Pneumonia                                    | Self-report of physician-diagnosed pneumonia                              | 0=no; 1=yes                                     |
| 27 | Chronic bronchitis/emphysema                 | Self-report of physician-diagnosed chronic bronchitis/emphysema           | 0=no; 1=yes                                     |
| 28 | Asthma                                       | Self-report of physician-diagnosed asthma                                 | 0=no; 1=yes                                     |
|    | Musculoskeletal                              |                                                                           |                                                 |
| 29 | Rheumatoid arthritis                         | Self-report of physician-diagnosed rheumatoid arthritis                   | 0=no; 1=yes                                     |
| 30 | Osteoarthritis                               | Self-report of physician-diagnosed osteoarthritis                         | 0=no; 1=yes                                     |
| 31 | Gout                                         | Self-report of physician-diagnosed gout                                   | 0=no; 1=yes                                     |
| 32 | Osteoporosis                                 | Self-report of physician-diagnosed osteoporosis                           | 0=no; 1=yes                                     |
|    | Immunological                                |                                                                           |                                                 |
| 33 | Hay fever, allergic rhinitis or eczema       | Self-report of physician-diagnosed hay fever, allergic rhinitis or eczema | 0=no; 1=yes                                     |
| 34 | Psoriasis                                    | Self-report of physician-diagnosed psoriasis                              | 0=no; 1=yes                                     |
|    | Cancer                                       |                                                                           |                                                 |
| 35 | Any cancer diagnosis                         | Self-report of physician-diagnosed any cancer                             | 0=no; 1=yes                                     |
| 36 | Multiple cancers diagnosed (number reported) | Self-report of physician-diagnosed multiple cancer                        | 0=no cancer or single cancer; 1=multiple cancer |
|    | Pain                                         |                                                                           |                                                 |
| 37 | Chest pain                                   | Self-report of ever experiencing chest pain                               | 0=no; 1=yes                                     |
| 38 | Head and/or neck pain                        | Self-report of ever experiencing head and/or neck pain                    | 0=no; 1=yes                                     |
| 39 | Back pain                                    | Self-report of ever experiencing back pain                                | 0=no; 1=yes                                     |
| 40 | Stomach/abdominal pain                       | Self-report of ever experiencing stomach/abdominal pain                   | 0=no; 1=yes                                     |
| 41 | Hip pain                                     | Self-report of ever experiencing hip pain                                 | 0=no; 1=yes                                     |
| 42 | Knee pain                                    | Self-report of ever experiencing knee pain                                | 0=no; 1=yes                                     |
| 43 | Whole-body pain                              | Self-report of ever experiencing whole-body pain                          | 0=no; 1=yes                                     |
| 44 | Facial pain                                  | Self-report of ever experiencing facial pain                              | 0=no; 1=yes                                     |
| 45 | Sciatica                                     | Self-report of physician-diagnosed sciatica                               | 0=no; 1=yes                                     |
|    | Gastrointestinal                             |                                                                           |                                                 |
| 46 | Gastric reflux                               | Self-report of physician-diagnosed gastric reflux                         | 0=no; 1=yes                                     |
| 47 | Hiatus hernia                                | Self-report of physician-diagnosed hiatus hernia                          | 0=no; 1=yes                                     |
| 48 | Gall stones                                  | Self-report of physician-diagnosed gall stones                            | 0=no; 1=yes                                     |
| 49 | Diverticulitis                               | Self-report of physician-diagnosed diverticulitis                         | 0=no; 1=yes                                     |

Notes: Deficit points are summed for each individual, and divided by the total number of deficits, to produce a frailty index with a range from 0 to 1.

**Supplementary Table 2.** Regression models predicting frailty index

|                     | <b>Non-imputed data<sup>1</sup></b> | <b>Imputed data<sup>1</sup></b> |
|---------------------|-------------------------------------|---------------------------------|
|                     | <b>(n=190,575)</b>                  | <b>(n=502,489)</b>              |
| Breastfed as a baby | -0.0042 (-0.0048,-0.0035)†          | -0.0045 (-0.0051,-0.0038)†      |
| Maternal smoking    | 0.0118 (0.0111,0.0125)†             | 0.0122 (0.0116,0.0128)†         |
| Low birthweight     | 0.0108 (0.0097,0.0118)†             | 0.0114 (0.0105,0.0122)†         |
| High birthweight    | 0.0030 (0.0021,0.0039)†             | 0.0036 (0.0028,0.0044)†         |
| Perinatal diseases  | 0.0117 (0.0049,0.0185)*             | 0.0107 (0.0046,0.0167)*         |
| Birth month (cos)   | -0.0006 (-0.0011,-0.000)*           | -0.0006 (-0.0010,-0.0002)*      |
| Born in the UK      | 0.0024 (0.0011,0.0037)†             | 0.0018 (0.0006,0.0030)*         |
| Education           | -0.0140 (-0.0147,-0.0134)†          | -0.0144 (-0.0150,-0.0139)†      |
| Age (years)         | 0.0015 (0.0015,0.0015)†             | 0.0015 (0.0015,0.0016)†         |
| Male                | -0.0084 (-0.0090,-0.0078)†          | -0.0084 (-0.0090,-0.0079)†      |
| Caucasian ethnicity | -0.0069 (-0.0088,-0.0050)†          | -0.0068 (-0.0085,-0.0051)†      |
| Smoking             | 0.0244 (0.0234,0.0254)†             | 0.0248 (0.0239,0.0257)†         |
| Alcohol drinking    | -0.0260 (-0.0272,-0.0248)†          | -0.0268 (-0.0279,-0.0258)†      |
| Physical activity   | -0.0065 (-0.0068,-0.0062)†          | -0.0069 (-0.0072,-0.0067)†      |
| Intercept           | 0.0976 (0.0947,0.1005)†             | 0.0998 (0.0972,0.1024)†         |

Note: <sup>1</sup> presented are coefficients (95% confidence intervals); \*Significant at 0.05; † Significant at 0.0001. Non-imputed analysis was based on 214,104 respondents with complete information on all variables. The maternal smoking variable includes 13.86% missing data, the breastfed as a baby variable includes 23.64% missing data, the birthweight variable includes 44.88% missing data, the education variable includes 2.02% missing data, and the moderate or vigorous physical activity variable includes 2.43% missing data. The imputed analysis included all the respondents (n=502,489).

# Reporting checklist for cross sectional study.

Based on the STROBE cross sectional guidelines.

## Instructions to authors

Complete this checklist by entering the page numbers from your manuscript where readers will find each of the items listed below.

Your article may not currently address all the items on the checklist. Please modify your text to include the missing information. If you are certain that an item does not apply, please write "n/a" and provide a short explanation.

Upload your completed checklist as an extra file when you submit to a journal.

In your methods section, say that you used the STROBE cross sectional reporting guidelines, and cite them as:

von Elm E, Altman DG, Egger M, Pocock SJ, Gotsche PC, Vandenbroucke JP. The Strengthening the Reporting of Observational Studies in Epidemiology (STROBE) Statement: guidelines for reporting observational studies.

|                           |                     |                                                                                    | Page   |
|---------------------------|---------------------|------------------------------------------------------------------------------------|--------|
|                           |                     | Reporting Item                                                                     | Number |
| <b>Title and abstract</b> |                     |                                                                                    |        |
| Title                     | <a href="#">#1a</a> | Indicate the study's design with a commonly used term in the title or the abstract | 1      |
| Abstract                  | <a href="#">#1b</a> | Provide in the abstract an informative and balanced summary                        | 3      |

of what was done and what was found

## Introduction

Background / [#2](#) Explain the scientific background and rationale for the 4  
 rationale investigation being reported

Objectives [#3](#) State specific objectives, including any prespecified 6  
 hypotheses

## Methods

Study design [#4](#) Present key elements of study design early in the paper 7

Setting [#5](#) Describe the setting, locations, and relevant dates, including 7  
 periods of recruitment, exposure, follow-up, and data collection

Eligibility criteria [#6a](#) Give the eligibility criteria, and the sources and methods of 7  
 selection of participants.

[#7](#) Clearly define all outcomes, exposures, predictors, potential 8-9  
 confounders, and effect modifiers. Give diagnostic criteria, if applicable

Data sources / [#8](#) For each variable of interest give sources of data and details of 9  
 measurement methods of assessment (measurement). Describe comparability of assessment methods if there is more than one group. Give information separately for for exposed and unexposed groups if applicable.

Bias [#9](#) Describe any efforts to address potential sources of bias 10

Study size [#10](#) Explain how the study size was arrived at 8

|    |                  |                      |                                                                   |      |
|----|------------------|----------------------|-------------------------------------------------------------------|------|
| 1  | Quantitative     | <a href="#">#11</a>  | Explain how quantitative variables were handled in the            | 8-9  |
| 2  |                  |                      |                                                                   |      |
| 3  | variables        |                      | analyses. If applicable, describe which groupings were chosen,    |      |
| 4  |                  |                      |                                                                   |      |
| 5  |                  |                      | and why                                                           |      |
| 6  |                  |                      |                                                                   |      |
| 7  |                  |                      |                                                                   |      |
| 8  |                  |                      |                                                                   |      |
| 9  | Statistical      | <a href="#">#12a</a> | Describe all statistical methods, including those used to control | 9-10 |
| 10 |                  |                      |                                                                   |      |
| 11 | methods          |                      | for confounding                                                   |      |
| 12 |                  |                      |                                                                   |      |
| 13 |                  |                      |                                                                   |      |
| 14 | Statistical      | <a href="#">#12b</a> | Describe any methods used to examine subgroups and                | 10   |
| 15 |                  |                      |                                                                   |      |
| 16 | methods          |                      | interactions                                                      |      |
| 17 |                  |                      |                                                                   |      |
| 18 |                  |                      |                                                                   |      |
| 19 | Statistical      | <a href="#">#12c</a> | Explain how missing data were addressed                           | 10   |
| 20 |                  |                      |                                                                   |      |
| 21 | methods          |                      |                                                                   |      |
| 22 |                  |                      |                                                                   |      |
| 23 |                  |                      |                                                                   |      |
| 24 |                  |                      |                                                                   |      |
| 25 | Statistical      | <a href="#">#12d</a> | If applicable, describe analytical methods taking account of      | 8    |
| 26 |                  |                      |                                                                   |      |
| 27 | methods          |                      | sampling strategy                                                 |      |
| 28 |                  |                      |                                                                   |      |
| 29 |                  |                      |                                                                   |      |
| 30 | Statistical      | <a href="#">#12e</a> | Describe any sensitivity analyses                                 | 10   |
| 31 |                  |                      |                                                                   |      |
| 32 | methods          |                      |                                                                   |      |
| 33 |                  |                      |                                                                   |      |
| 34 |                  |                      |                                                                   |      |
| 35 |                  |                      |                                                                   |      |
| 36 | <b>Results</b>   |                      |                                                                   |      |
| 37 |                  |                      |                                                                   |      |
| 38 |                  |                      |                                                                   |      |
| 39 | Participants     | <a href="#">#13a</a> | Report numbers of individuals at each stage of study—eg           | 7    |
| 40 |                  |                      |                                                                   |      |
| 41 |                  |                      | numbers potentially eligible, examined for eligibility, confirmed |      |
| 42 |                  |                      |                                                                   |      |
| 43 |                  |                      | eligible, included in the study, completing follow-up, and        |      |
| 44 |                  |                      |                                                                   |      |
| 45 |                  |                      | analysed. Give information separately for for exposed and         |      |
| 46 |                  |                      |                                                                   |      |
| 47 |                  |                      | unexposed groups if applicable.                                   |      |
| 48 |                  |                      |                                                                   |      |
| 49 |                  |                      |                                                                   |      |
| 50 |                  |                      |                                                                   |      |
| 51 | Participants     | <a href="#">#13b</a> | Give reasons for non-participation at each stage                  | n/a  |
| 52 |                  |                      |                                                                   |      |
| 53 |                  |                      |                                                                   |      |
| 54 | Participants     | <a href="#">#13c</a> | Consider use of a flow diagram                                    | n/a  |
| 55 |                  |                      |                                                                   |      |
| 56 |                  |                      |                                                                   |      |
| 57 | Descriptive data | <a href="#">#14a</a> | Give characteristics of study participants (eg demographic,       | 11   |
| 58 |                  |                      |                                                                   |      |
| 59 |                  |                      |                                                                   |      |
| 60 |                  |                      |                                                                   |      |

clinical, social) and information on exposures and potential confounders. Give information separately for exposed and unexposed groups if applicable.

|    |                   |                      |                                                                                                                                                                                                          |       |
|----|-------------------|----------------------|----------------------------------------------------------------------------------------------------------------------------------------------------------------------------------------------------------|-------|
| 8  | Descriptive data  | <a href="#">#14b</a> | Indicate number of participants with missing data for each variable of interest                                                                                                                          | 11    |
| 9  |                   |                      |                                                                                                                                                                                                          |       |
| 10 |                   |                      |                                                                                                                                                                                                          |       |
| 11 |                   |                      |                                                                                                                                                                                                          |       |
| 12 |                   |                      |                                                                                                                                                                                                          |       |
| 13 | Outcome data      | <a href="#">#15</a>  | Report numbers of outcome events or summary measures. Give information separately for exposed and unexposed groups if applicable.                                                                        | 11    |
| 14 |                   |                      |                                                                                                                                                                                                          |       |
| 15 |                   |                      |                                                                                                                                                                                                          |       |
| 16 |                   |                      |                                                                                                                                                                                                          |       |
| 17 |                   |                      |                                                                                                                                                                                                          |       |
| 18 |                   |                      |                                                                                                                                                                                                          |       |
| 19 |                   |                      |                                                                                                                                                                                                          |       |
| 20 |                   |                      |                                                                                                                                                                                                          |       |
| 21 | Main results      | <a href="#">#16a</a> | Give unadjusted estimates and, if applicable, confounder-adjusted estimates and their precision (eg, 95% confidence interval). Make clear which confounders were adjusted for and why they were included | 11-12 |
| 22 |                   |                      |                                                                                                                                                                                                          |       |
| 23 |                   |                      |                                                                                                                                                                                                          |       |
| 24 |                   |                      |                                                                                                                                                                                                          |       |
| 25 |                   |                      |                                                                                                                                                                                                          |       |
| 26 |                   |                      |                                                                                                                                                                                                          |       |
| 27 |                   |                      |                                                                                                                                                                                                          |       |
| 28 |                   |                      |                                                                                                                                                                                                          |       |
| 29 |                   |                      |                                                                                                                                                                                                          |       |
| 30 |                   |                      |                                                                                                                                                                                                          |       |
| 31 | Main results      | <a href="#">#16b</a> | Report category boundaries when continuous variables were categorized                                                                                                                                    | 11-12 |
| 32 |                   |                      |                                                                                                                                                                                                          |       |
| 33 |                   |                      |                                                                                                                                                                                                          |       |
| 34 |                   |                      |                                                                                                                                                                                                          |       |
| 35 |                   |                      |                                                                                                                                                                                                          |       |
| 36 | Main results      | <a href="#">#16c</a> | If relevant, consider translating estimates of relative risk into absolute risk for a meaningful time period                                                                                             | 12    |
| 37 |                   |                      |                                                                                                                                                                                                          |       |
| 38 |                   |                      |                                                                                                                                                                                                          |       |
| 39 |                   |                      |                                                                                                                                                                                                          |       |
| 40 |                   |                      |                                                                                                                                                                                                          |       |
| 41 |                   |                      |                                                                                                                                                                                                          |       |
| 42 | Other analyses    | <a href="#">#17</a>  | Report other analyses done—e.g., analyses of subgroups and interactions, and sensitivity analyses                                                                                                        | 12-13 |
| 43 |                   |                      |                                                                                                                                                                                                          |       |
| 44 |                   |                      |                                                                                                                                                                                                          |       |
| 45 |                   |                      |                                                                                                                                                                                                          |       |
| 46 |                   |                      |                                                                                                                                                                                                          |       |
| 47 | <b>Discussion</b> |                      |                                                                                                                                                                                                          |       |
| 48 |                   |                      |                                                                                                                                                                                                          |       |
| 49 |                   |                      |                                                                                                                                                                                                          |       |
| 50 | Key results       | <a href="#">#18</a>  | Summarise key results with reference to study objectives                                                                                                                                                 | 13    |
| 51 |                   |                      |                                                                                                                                                                                                          |       |
| 52 |                   |                      |                                                                                                                                                                                                          |       |
| 53 | Limitations       | <a href="#">#19</a>  | Discuss limitations of the study, taking into account sources of potential bias or imprecision. Discuss both direction and magnitude of any potential bias.                                              | 14-15 |
| 54 |                   |                      |                                                                                                                                                                                                          |       |
| 55 |                   |                      |                                                                                                                                                                                                          |       |
| 56 |                   |                      |                                                                                                                                                                                                          |       |
| 57 |                   |                      |                                                                                                                                                                                                          |       |
| 58 |                   |                      |                                                                                                                                                                                                          |       |
| 59 |                   |                      |                                                                                                                                                                                                          |       |
| 60 |                   |                      |                                                                                                                                                                                                          |       |

|    |                          |                     |                                                                      |       |
|----|--------------------------|---------------------|----------------------------------------------------------------------|-------|
| 1  | Interpretation           | <a href="#">#20</a> | Give a cautious overall interpretation considering objectives,       | 14-15 |
| 2  |                          |                     | limitations, multiplicity of analyses, results from similar studies, |       |
| 3  |                          |                     | and other relevant evidence.                                         |       |
| 4  |                          |                     |                                                                      |       |
| 5  |                          |                     |                                                                      |       |
| 6  |                          |                     |                                                                      |       |
| 7  |                          |                     |                                                                      |       |
| 8  |                          |                     |                                                                      |       |
| 9  | Generalisability         | <a href="#">#21</a> | Discuss the generalisability (external validity) of the study        | 14    |
| 10 |                          |                     | results                                                              |       |
| 11 |                          |                     |                                                                      |       |
| 12 |                          |                     |                                                                      |       |
| 13 |                          |                     |                                                                      |       |
| 14 | <b>Other Information</b> |                     |                                                                      |       |
| 15 |                          |                     |                                                                      |       |
| 16 |                          |                     |                                                                      |       |
| 17 | Funding                  | <a href="#">#22</a> | Give the source of funding and the role of the funders for the       | 16    |
| 18 |                          |                     | present study and, if applicable, for the original study on which    |       |
| 19 |                          |                     | the present article is based                                         |       |
| 20 |                          |                     |                                                                      |       |
| 21 |                          |                     |                                                                      |       |
| 22 |                          |                     |                                                                      |       |
| 23 |                          |                     |                                                                      |       |
| 24 |                          |                     |                                                                      |       |

25 The STROBE checklist is distributed under the terms of the Creative Commons Attribution License  
26 CC-BY. This checklist was completed on 17. September 2021 using <https://www.goodreports.org/>, a  
27 tool made by the [EQUATOR Network](#) in collaboration with [Penelope.ai](#)  
28  
29  
30  
31  
32  
33  
34  
35  
36  
37  
38  
39  
40  
41  
42  
43  
44  
45  
46  
47  
48  
49  
50  
51  
52  
53  
54  
55  
56  
57  
58  
59  
60
