# Supplementary material for: Education mediating the associations between early life factors and frailty: a cross-sectional study of the UK Biobank
Source: PubMed Central journal article supplement (PMC9990643; doi:10.1136/bmjopen-2021-057511), 2023-03-02
Supplement: bmjopen-2021-057511supp001.pdf [file bmjopen-2021-057511supp001.pdf]

## Supplementary Material: Pathways linking early life factors and frailty among middle-aged and older adults in England: Findings from UK Biobank

**Supplementary Table 1.** Variables included in the UK Biobank frailty indices

| Item | Variable                                  | Definition                                                                                                                      | Coding                                                                  |
|------|-------------------------------------------|---------------------------------------------------------------------------------------------------------------------------------|-------------------------------------------------------------------------|
|      | Sensory                                   |                                                                                                                                 |                                                                         |
| 1    | Glaucoma                                  | Self-report of physician-diagnosed glaucoma                                                                                     | 0=no; 1=yes                                                             |
| 2    | Cataracts                                 | Self-report of physician-diagnosed glaucoma                                                                                     | 0=no; 1=yes                                                             |
| 3    | Hearing difficulty                        | Self-report experiencing hearing difficulty                                                                                     | 0=no; 1=yes/completely deaf                                             |
|      | Cranial                                   |                                                                                                                                 |                                                                         |
| 4    | Migraine                                  | Self-report of physician-diagnosed migraine                                                                                     | 0=no; 1=yes                                                             |
| 5    | Dental problems                           | Self-report of physician-diagnosed dental problems, i.e., ulcers, painful gums, bleeding gums, loose teeth, toothache, dentures | 0=none; 1=any                                                           |
|      | Mental well-being                         |                                                                                                                                 |                                                                         |
| 6    | Self-rated health                         | Self-rated health in 4 Likert scale                                                                                             | 0=excellent; 0.25=good; 0.5=fair; 1=poor                                |
| 7    | Fatigue                                   | Self-report of frequency of tiredness / lethargy in last two weeks                                                              | 0=not at all; 0.25=several days; 0.5=more than half; 1=nearly every day |
| 8    | Sleep                                     | Self-report experiencing of sleeplessness/ insomnia                                                                             | 0=never/rarely; 0.5=sometimes; 1=usually                                |
| 9    | Depressed feelings                        | Self-report of frequency having depressed feeling in last two weeks                                                             | 0=not at all; 0.5=several days; 0.75=more than half; 1=nearly every day |
| 10   | Self-described nervous personality        | Self-report of having nervous personality                                                                                       | 0=no; 1=yes                                                             |
| 11   | Severe anxiety/ panic attacks             | Self-report of physician-diagnosed severe anxiety/panic attacks                                                                 | 0=no; 1=yes                                                             |
| 12   | Common to feel loneliness                 | Self-report of feeling lonely commonly                                                                                          | 0=no; 1=yes                                                             |
| 13   | Sense of misery (ever/never)              | Self-report of ever having sense of misery                                                                                      | 0=no; 1=yes                                                             |
|      | Infirmity                                 |                                                                                                                                 |                                                                         |
| 14   | Infirmity                                 | Self-report of having long-standing illness or disability                                                                       | 0=no; 1=yes                                                             |
| 15   | Falls in last year                        | Self-report of experiencing falls last year                                                                                     | 0=no falls; 0.5=one fall; 1=more than one fall                          |
| 16   | Fractures/broken bones in last five years | Self-report of experiencing fractures/broken bones in last five years                                                           | 0=no; 1=yes                                                             |
|      | Cardiometabolic                           |                                                                                                                                 |                                                                         |
| 17   | Diabetes                                  | Self-report of physician-diagnosed diabetes                                                                                     | 0=no; 1=yes                                                             |
| 18   | Myocardial infarction                     | Self-report of physician-diagnosed myocardial infarction                                                                        | 0=no; 1=yes                                                             |
| 19   | Angina                                    | Self-report of physician-diagnosed angina                                                                                       | 0=no; 1=yes                                                             |
| 20   | Stroke                                    | Self-report of physician-diagnosed stroke                                                                                       | 0=no; 1=yes                                                             |
| 21   | High blood pressure                       | Self-report of physician-diagnosed high blood pressure                                                                          | 0=no; 1=yes                                                             |
| 22   | Hypothyroidism                            | Self-report of physician-diagnosed hypothyroidism                                                                               | 0=no; 1=yes                                                             |
| 23   | Deep-vein thrombosis                      | Self-report of physician-diagnosed deep-vein thrombosis                                                                         | 0=no; 1=yes                                                             |
| 24   | High cholesterol                          | Self-report of physician-diagnosed high cholesterol                                                                             | 0=no; 1=yes                                                             |

|    |                                              |                                                                           |                                                 |
|----|----------------------------------------------|---------------------------------------------------------------------------|-------------------------------------------------|
|    | Respiratory                                  |                                                                           |                                                 |
| 25 | Breathing                                    | Self-report of having wheeze in last year                                 | 0=no; 1=yes                                     |
| 26 | Pneumonia                                    | Self-report of physician-diagnosed pneumonia                              | 0=no; 1=yes                                     |
| 27 | Chronic bronchitis/emphysema                 | Self-report of physician-diagnosed chronic bronchitis/emphysema           | 0=no; 1=yes                                     |
| 28 | Asthma                                       | Self-report of physician-diagnosed asthma                                 | 0=no; 1=yes                                     |
|    | Musculoskeletal                              |                                                                           |                                                 |
| 29 | Rheumatoid arthritis                         | Self-report of physician-diagnosed rheumatoid arthritis                   | 0=no; 1=yes                                     |
| 30 | Osteoarthritis                               | Self-report of physician-diagnosed osteoarthritis                         | 0=no; 1=yes                                     |
| 31 | Gout                                         | Self-report of physician-diagnosed gout                                   | 0=no; 1=yes                                     |
| 32 | Osteoporosis                                 | Self-report of physician-diagnosed osteoporosis                           | 0=no; 1=yes                                     |
|    | Immunological                                |                                                                           |                                                 |
| 33 | Hay fever, allergic rhinitis or eczema       | Self-report of physician-diagnosed hay fever, allergic rhinitis or eczema | 0=no; 1=yes                                     |
| 34 | Psoriasis                                    | Self-report of physician-diagnosed psoriasis                              | 0=no; 1=yes                                     |
|    | Cancer                                       |                                                                           |                                                 |
| 35 | Any cancer diagnosis                         | Self-report of physician-diagnosed any cancer                             | 0=no; 1=yes                                     |
| 36 | Multiple cancers diagnosed (number reported) | Self-report of physician-diagnosed multiple cancer                        | 0=no cancer or single cancer; 1=multiple cancer |
|    | Pain                                         |                                                                           |                                                 |
| 37 | Chest pain                                   | Self-report of ever experiencing chest pain                               | 0=no; 1=yes                                     |
| 38 | Head and/or neck pain                        | Self-report of ever experiencing head and/or neck pain                    | 0=no; 1=yes                                     |
| 39 | Back pain                                    | Self-report of ever experiencing back pain                                | 0=no; 1=yes                                     |
| 40 | Stomach/abdominal pain                       | Self-report of ever experiencing stomach/abdominal pain                   | 0=no; 1=yes                                     |
| 41 | Hip pain                                     | Self-report of ever experiencing hip pain                                 | 0=no; 1=yes                                     |
| 42 | Knee pain                                    | Self-report of ever experiencing knee pain                                | 0=no; 1=yes                                     |
| 43 | Whole-body pain                              | Self-report of ever experiencing whole-body pain                          | 0=no; 1=yes                                     |
| 44 | Facial pain                                  | Self-report of ever experiencing facial pain                              | 0=no; 1=yes                                     |
| 45 | Sciatica                                     | Self-report of physician-diagnosed sciatica                               | 0=no; 1=yes                                     |
|    | Gastrointestinal                             |                                                                           |                                                 |
| 46 | Gastric reflux                               | Self-report of physician-diagnosed gastric reflux                         | 0=no; 1=yes                                     |
| 47 | Hiatus hernia                                | Self-report of physician-diagnosed hiatus hernia                          | 0=no; 1=yes                                     |
| 48 | Gall stones                                  | Self-report of physician-diagnosed gall stones                            | 0=no; 1=yes                                     |
| 49 | Diverticulitis                               | Self-report of physician-diagnosed diverticulitis                         | 0=no; 1=yes                                     |

Notes: Deficit points are summed for each individual, and divided by the total number of deficits, to produce a frailty index with a range from 0 to 1.

**Supplementary Table 2.** Regression models predicting frailty index

|                     | <b>Non-imputed data<sup>1</sup></b><br><b>(n=190,575)</b> | <b>Imputed data<sup>1</sup></b><br><b>(n=502,489)</b> |
|---------------------|-----------------------------------------------------------|-------------------------------------------------------|
| Breastfed as a baby | -0.0042 (-0.0048,-0.0035)†                                | -0.0045 (-0.0051,-0.0038)†                            |
| Maternal smoking    | 0.0118 (0.0111,0.0125)†                                   | 0.0122 (0.0116,0.0128)†                               |
| Low birthweight     | 0.0108 (0.0097,0.0118)†                                   | 0.0114 (0.0105,0.0122)†                               |
| High birthweight    | 0.0030 (0.0021,0.0039)†                                   | 0.0036 (0.0028,0.0044)†                               |
| Perinatal diseases  | 0.0117 (0.0049,0.0185)*                                   | 0.0107 (0.0046,0.0167)*                               |
| Birth month (cos)   | -0.0006 (-0.0011,-0.000)*                                 | -0.0006 (-0.0010,-0.0002)*                            |
| Born in the UK      | 0.0024 (0.0011,0.0037)†                                   | 0.0018 (0.0006,0.0030)*                               |
| Education           | -0.0140 (-0.0147,-0.0134)†                                | -0.0144 (-0.0150,-0.0139)†                            |
| Age (years)         | 0.0015 (0.0015,0.0015)†                                   | 0.0015 (0.0015,0.0016)†                               |
| Male                | -0.0084 (-0.0090,-0.0078)†                                | -0.0084 (-0.0090,-0.0079)†                            |
| Caucasian ethnicity | -0.0069 (-0.0088,-0.0050)†                                | -0.0068 (-0.0085,-0.0051)†                            |
| Smoking             | 0.0244 (0.0234,0.0254)†                                   | 0.0248 (0.0239,0.0257)†                               |
| Alcohol drinking    | -0.0260 (-0.0272,-0.0248)†                                | -0.0268 (-0.0279,-0.0258)†                            |
| Physical activity   | -0.0065 (-0.0068,-0.0062)†                                | -0.0069 (-0.0072,-0.0067)†                            |
| Intercept           | 0.0976 (0.0947,0.1005)†                                   | 0.0998 (0.0972,0.1024)†                               |

Note: <sup>1</sup> presented are coefficients (95% confidence intervals); \*Significant at 0.05; † Significant at 0.0001. Non-imputed analysis was based on 214,104 respondents with complete information on all variables. The maternal smoking variable includes 13.86% missing data, the breastfed as a baby variable includes 23.64% missing data, the birthweight variable includes 44.88% missing data, the education variable includes 2.02% missing data, and the moderate or vigorous physical activity variable includes 2.43% missing data. The imputed analysis included all the respondents (n=502,489).
